# Supplementary material for: Deconvoluting Post-Transplant Immunity: Cell Subset-Specific Mapping Reveals Pathways for Activation and Expansion of Memory T, Monocytes and B Cells
Source: PLoS One. 2010 Oct 14;5(10):e13358. doi: 10.1371/journal.pone.0013358 (PMC2954794; doi:10.1371/journal.pone.0013358)
Supplement: Table S1 — Whole Blood multivariate gene expression (1.62 MB XLS) [file pone.0013358.s003.xls]

## Sheet: Data S1
Supplemental Table S1: Whole Blood multivariate gene expression
Gene symbo	Parametric p-value	FDR	Geom mean of intensities in Pre-Tx	Geom mean of intensities in Wk1	Geom mean of intensities in Wk2	Fold change Early	Geom mean of intensities in Wk4	Geom mean of intensities in Wk8	Geom mean of intensities in Wk12	Fold Change Late	Probeset	Description
CEACAM1	0.0008162	0.0192234	36.0036	116.788	96.3519	2.67617	84.4032	109.265	128.509	3.56934	209498_at	carcinoembryonic antigen-related cell adhesion molecule 1 (biliary glycoprotein)
HP	0.0008451	0.0197063	73.2997	294.369	194.712	2.65638	138.551	124.024	234.196	3.19505	206697_s_at	haptoglobin
PRKAR2B	0.0001582	0.0057934	35.9476	72.2093	167.413	4.65713	161.176	123.738	108.811	3.02692	203680_at	protein kinase, cAMP-dependent, regulatory, type II, beta
HIST2H2BE	0.0002815	0.0089068	76.3814	204.447	292.559	3.83024	188.219	226.726	221.894	2.90507	202708_s_at	histone cluster 2, H2be
FMNL2	7.7e-05	0.0033386	6.92687	7.94084	8.95518	1.29282	12.1872	12.1902	19.5791	2.82655	226184_at	formin-like 2
GPR84	1.79e-05	0.0010755	14.1008	58.6981	23.3686	1.65725	20.5529	21.6115	39.1412	2.77581	223767_at	G protein-coupled receptor 84
HIST1H3D	0.0009476	0.0214801	68.2648	220.399	221.885	3.25036	154.053	181.125	170.508	2.49774	214472_at	histone cluster 1, H3d
HIST1H3H	0.000148	0.005516	46.322	166.484	169.863	3.667	108.799	139.466	115.156	2.486	206110_at	histone cluster 1, H3h
GUCY1B3	0.0002129	0.0072255	5.68835	9.49418	14.5164	2.55194	12.1568	10.5688	14.0874	2.47654	203817_at	guanylate cyclase 1, soluble, beta 3
HIST1H2BD	0.0006004	0.0155578	117.85	268.345	386.536	3.27989	264.709	321.403	289.667	2.45792	209911_x_at	histone cluster 1, H2bd
HIST1H2AC	0.0002494	0.008107	341.448	715.222	978.637	2.86613	795.614	904.478	806.541	2.36212	215071_s_at	histone cluster 1, H2ac
PGLYRP1	1.21e-05	0.000798	222.112	960.821	588.79	2.65087	464.017	373.755	523.109	2.35516	207384_at	peptidoglycan recognition protein 1
RHOB	5.57e-05	0.0025852	201.535	331.871	480.607	2.38473	371.145	580.382	471.835	2.3412	212099_at	ras homolog gene family, member B
TUBB1	0.0006101	0.015668	309.316	568.671	931.198	3.01051	908.53	729.768	716.742	2.31719	230690_at	tubulin, beta 1
SLC26A8	0.0007995	0.0189396	27.4172	79.0887	53.299	1.944	42.8563	65.6865	60.5884	2.20987	237340_at	solute carrier family 26, member 8
NA	7.06e-05	0.0031281	7.60425	17.5123	20.4754	2.69263	13.1983	15.7596	16.7452	2.20209	239669_at	NA
PRRG4	0.0005236	0.0141609	72.4663	149.528	122.107	1.68501	137.006	155.489	156.92	2.16542	207291_at	proline rich Gla (G-carboxyglutamic acid) 4 (transmembrane)
HIST1H4D	0.000491	0.0135789	8.82651	15.0759	17.2443	1.95369	11.9975	14.2058	18.8835	2.13941	208076_at	histone cluster 1, H4d
MMP9	3.4e-06	0.0003003	621.391	3062.27	1264.1	2.0343	803.384	786.613	1306.88	2.10315	203936_s_at	matrix metallopeptidase 9 (gelatinase B, 92kDa gelatinase, 92kDa type IV collagenase)
BPI	6.77e-05	0.0030241	64.022	431.503	305.05	4.76478	164.372	105.646	132.335	2.06703	205557_at	bactericidal/permeability-increasing protein
CHST11	0.0009392	0.0213339	43.099	54.1087	123.334	2.86163	103.169	110.906	87.3636	2.02704	219634_at	carbohydrate (chondroitin 4) sulfotransferase 11
RNF19B	0.0009381	0.0213267	79.493	181.066	220.056	2.76824	153.248	235.034	158.955	1.99961	36564_at	ring finger protein 19B
HIST4H4	0.0002891	0.0091157	28.1287	54.174	84.5592	3.00616	50.2815	52.0449	56.1498	1.99618	232035_at	histone cluster 4, H4
FRMD3	0.0004694	0.0131438	15.8405	52.5152	42.6437	2.69207	27.577	29.0005	31.3988	1.98219	242600_at	FERM domain containing 3
NA	0.0008869	0.0204518	10.2219	12.8822	15.8912	1.55463	21.8829	30.748	19.2236	1.88064	239966_at	NA
ABHD2	0.0002394	0.0078519	75.8111	168.198	149.538	1.9725	144.417	155.673	140.332	1.85107	228490_at	abhydrolase domain containing 2
TLR4	0.0004023	0.0117028	34.4438	55.3731	79.4991	2.30808	62.6361	69.1149	63.6731	1.84861	1552798_a_at	toll-like receptor 4
EPS8	0.0005971	0.0155237	4.60778	4.20458	5.91088	1.2828	5.16385	5.25604	8.35343	1.81289	202609_at	epidermal growth factor receptor pathway substrate 8
MS4A3	0.0006765	0.0168126	7.75069	40.5093	70.6477	9.11502	35.0239	13.1311	13.6983	1.76737	210254_at	membrane-spanning 4-domains, subfamily A, member 3 (hematopoietic cell-specific)
LCN2	0.0001677	0.0060601	139.759	796.731	644.139	4.60894	415.522	241.801	246.071	1.76069	212531_at	lipocalin 2
CA4	4.8e-05	0.0022961	62.2654	185.705	147.148	2.36324	90.6796	93.6123	107.875	1.7325	206209_s_at	carbonic anhydrase IV
ST6GALNAC4	0.0008913	0.0205187	182.848	151.153	386.829	2.11558	473.067	447.136	314.472	1.71986	220937_s_at	ST6 (alpha-N-acetyl-neuraminyl-2,3-beta-galactosyl-1,3)-N-acetylgalactosaminide alpha-2,6-sialyltransferase 4
CR1	0.0002368	0.0077947	14.308	22.2718	24.3365	1.7009	30.3994	29.3662	24.5493	1.71577	217484_at	complement component (3b/4b) receptor 1 (Knops blood group)
PSMF1	0.0006562	0.0164275	479.19	476.632	1047.18	2.18531	1285.5	988.87	814.017	1.69873	201052_s_at	proteasome (prosome, macropain) inhibitor subunit 1 (PI31)
AHCTF1	0.0001852	0.0065244	19.6709	32.5758	46.6096	2.36947	32.6142	34.6812	32.9738	1.67627	214766_s_at	AT hook containing transcription factor 1
PLAUR	0.0002223	0.0074383	163.102	410.827	356.033	2.18288	260.946	285.634	269.026	1.64943	210845_s_at	plasminogen activator, urokinase receptor
CDC42EP2	0.0008339	0.0195261	59.0191	139.651	114.866	1.94626	139.892	112.666	96.8845	1.64158	214014_at	CDC42 effector protein (Rho GTPase binding) 2
MOSPD2	0.0006414	0.0161755	268.38	396.558	508.562	1.89493	465.389	515.237	430.441	1.60385	221895_at	motile sperm domain containing 2
P2RY13	0.0005766	0.0151057	502.098	723.042	882.881	1.75838	793.375	959.372	804.696	1.60267	220005_at	purinergic receptor P2Y, G-protein coupled, 13
VNN1	0.0005692	0.014962	7.63662	14.1003	12.1076	1.58546	9.07875	8.15787	12.2327	1.60185	1558549_s_at	vanin 1
RNF24	0.0002983	0.0093038	62.9977	136.756	117.698	1.86829	110.61	100.812	100.707	1.59859	204668_at	ring finger protein 24
HIST1H2AI	1.88e-05	0.0011197	23.3629	38.0969	42.3782	1.81391	36.9835	34.1488	37.165	1.59077	214542_x_at	histone cluster 1, H2ai
CPEB2	0.0007138	0.0174696	18.9589	28.1152	32.9985	1.74053	27.2896	27.8289	30.1543	1.59051	235479_at	cytoplasmic polyadenylation element binding protein 2
ABHD5	0.0009195	0.0209911	63.1184	117.747	166.044	2.63068	115.289	109.727	100.176	1.58711	218739_at	abhydrolase domain containing 5
C19orf59	0.0007382	0.0179303	293.103	713.322	359.144	1.22532	328.216	349.148	463.155	1.58018	235568_at	chromosome 19 open reading frame 59
FAM131A	0.0003261	0.0099662	46.5135	80.5902	73.4773	1.5797	63.7414	87.2227	73.0926	1.57143	221904_at	family with sequence similarity 131, member A
PADI4	3.76e-05	0.0019177	417.029	1132.42	792.338	1.89996	588.577	552.225	654.496	1.56943	220001_at	peptidyl arginine deiminase, type IV
MSRB3	0.000276	0.0087836	7.34143	12.136	11.5718	1.57623	11.0745	10.0333	11.4904	1.56515	1554127_s_at	methionine sulfoxide reductase B3
RTN3	0.0005553	0.0147384	283.496	548.572	491.986	1.73542	398.207	432.598	443.214	1.56339	224564_s_at	reticulon 3
LRG1	0.000576	0.0150972	252.227	645.424	445.296	1.76546	370.837	400.902	392.621	1.55662	228648_at	leucine-rich alpha-2-glycoprotein 1
RGL4	7.35e-05	0.003227	78.1942	193.221	138.589	1.77237	113.105	116.26	121.286	1.55108	235816_s_at	ral guanine nucleotide dissociation stimulator-like 4
CAMP	0.0004815	0.0134111	260.104	1117.61	743.608	2.85888	548.954	408.103	401.724	1.54447	210244_at	cathelicidin antimicrobial peptide
ST6GALNAC2	0.000456	0.012878	113.401	292.635	272.281	2.40105	207.809	196.327	175.103	1.54411	204542_at	ST6 (alpha-N-acetyl-neuraminyl-2,3-beta-galactosyl-1,3)-N-acetylgalactosaminide alpha-2,6-sialyltransferase 2
ST6GALNAC4	0.0009671	0.0218136	162.44	113.441	318.614	1.96143	400.032	358.125	250.026	1.53919	221551_x_at	ST6 (alpha-N-acetyl-neuraminyl-2,3-beta-galactosyl-1,3)-N-acetylgalactosaminide alpha-2,6-sialyltransferase 4
LOC440731	3.9e-06	0.0003347	54.1497	125.735	91.336	1.68673	73.8754	87.2865	83.2684	1.53774	237563_s_at	similar to hCG1817424
DEFA4	9e-06	0.0006399	102.962	1399.57	768.039	7.45941	563.299	216.388	155.86	1.51376	207269_at	defensin, alpha 4, corticostatin
RGS10	0.0009092	0.0207907	621.288	545.937	1190.4	1.91602	1260.72	1022.46	936.262	1.50697	204319_s_at	regulator of G-protein signaling 10
PHLPP	0.0007408	0.0179775	14.1068	27.3316	33.6521	2.38552	26.2197	24.6317	21.1778	1.50125	212719_at	PH domain and leucine rich repeat protein phosphatase
REPS2	2e-06	0.0002025	145.092	352.45	340.23	2.34492	275.681	248.118	217.762	1.50085	205645_at	RALBP1 associated Eps domain containing 2
PINK1	0.0006991	0.0172099	200.031	305.045	389.068	1.94504	428.025	443.491	298.966	1.4946	209018_s_at	PTEN induced putative kinase 1
F11R	0.0003229	0.009885	58.95	122.725	110.134	1.86826	96.4044	86.9556	87.8425	1.49012	224097_s_at	F11 receptor
CHP	0.0005149	0.0140185	28.5669	38.5141	58.67	2.05377	46.9325	44.7931	42.5302	1.48879	207993_s_at	calcium binding protein P22
PINK1	0.0005589	0.014798	387.79	608.512	708.78	1.82774	741.902	748.56	574.58	1.48168	209019_s_at	PTEN induced putative kinase 1
C5orf32	0.000633	0.0160525	443.795	752.171	820.915	1.84976	757.116	756.232	654.517	1.47482	224707_at	chromosome 5 open reading frame 32
MAPK14	0.0003661	0.0108904	71.0584	152.114	127.115	1.78887	101.96	101.509	104.004	1.46364	211561_x_at	mitogen-activated protein kinase 14
FAM149B1	0.0008096	0.0191292	6.95559	6.7681	12.772	1.83622	10.0658	11.319	10.1016	1.4523	213463_s_at	family with sequence similarity 149, member B1
SNN	0.0005309	0.014292	35.7552	67.8006	65.1376	1.82176	56.2573	49.973	51.846	1.45002	218033_s_at	stannin
SENP2	0.0003203	0.009844	23.8472	37.3628	36.8265	1.54427	30.0812	31.4889	34.4883	1.44622	218122_s_at	SUMO1/sentrin/SMT3 specific peptidase 2
RAB27A	1.97e-05	0.0011619	269.782	503.818	410.567	1.52185	341.35	308.598	389.827	1.44497	210951_x_at	RAB27A, member RAS oncogene family
TPST1	0.0001206	0.0047403	27.4581	81.8934	78.3672	2.85406	44.335	49.806	39.5014	1.4386	204140_at	tyrosylprotein sulfotransferase 1
IER3	0.00074	0.017966	216.548	505.255	397.273	1.83457	333.681	291.74	311.326	1.43767	201631_s_at	immediate early response 3
NA	0.0005687	0.0149561	5.02242	5.40998	6.99819	1.39339	5.76029	4.96114	7.21034	1.43563	242277_at	NA
RAB13	0.0006483	0.0163069	37.7175	104.877	73.7198	1.95453	64.1056	57.5931	53.7807	1.42588	202252_at	RAB13, member RAS oncogene family
TMEM38A	2.92e-05	0.0015621	40.7396	75.5328	56.5822	1.38887	54.5447	51.7907	58.0281	1.42436	222896_at	transmembrane protein 38A
MTMR3	0.0002789	0.0088553	249.598	405.426	398.388	1.59612	309.642	372.156	350.329	1.40357	202197_at	myotubularin related protein 3
TTC33	0.0007572	0.0182298	5.85704	6.27233	10.784	1.8412	7.31453	8.26504	8.20782	1.40136	219421_at	tetratricopeptide repeat domain 33
AZU1	4.8e-06	0.000397	20.5578	239.553	131.193	6.38168	89.5176	38.3654	28.7563	1.3988	214575_s_at	azurocidin 1
DST	2.9e-06	0.0002651	11.3255	13.0338	12.146	1.07245	13.4571	17.8563	15.8089	1.39587	215016_x_at	dystonin
MAX	0.0009912	0.0222144	38.6255	52.7157	73.7412	1.90913	60.2501	47.1172	53.2214	1.37788	208403_x_at	MYC associated factor X
INSC	0.0002535	0.0082061	4.57216	7.55148	6.83053	1.49394	4.65027	4.9416	6.29362	1.37651	237056_at	inscuteable homolog (Drosophila)
BRD3	8.96e-05	0.0037311	27.0187	32.7878	40.3053	1.49176	27.6937	26.47	37.079	1.37235	213788_s_at	bromodomain containing 3
NHSL2	0.0002608	0.0084009	13.6912	23.0443	28.0983	2.05228	21.2028	20.1091	18.6213	1.36009	1569932_at	NHS-like 2
CA4	0.0002157	0.0072799	55.0303	142.937	102.715	1.86652	68.735	65.3315	74.7131	1.35767	206208_at	carbonic anhydrase IV
HLX	0.0004397	0.0125407	177.766	367.449	351.538	1.97754	251.99	292.771	240.769	1.35442	214438_at	H2.0-like homeobox
FN1	6.15e-05	0.0027951	11.131	11.8677	10.421	-1.06813	13.4972	16.0609	15.058	1.3528	210495_x_at	fibronectin 1
HIST2H2AA3	0.0003315	0.0100637	632.523	1279.78	1088.7	1.72121	912.681	786.552	851.839	1.34673	218280_x_at	histone cluster 2, H2aa3
RAB27A	6.15e-05	0.0027951	209.164	380.841	297.148	1.42065	262.01	235.828	280.672	1.34187	209514_s_at	RAB27A, member RAS oncogene family
TCF4	0.0005339	0.0143445	10.0855	10.6444	13.5228	1.34081	13.2615	13.4636	13.4203	1.33065	212385_at	transcription factor 4
SRPK1	0.0001054	0.0042342	29.222	48.0259	42.6307	1.45886	32.8233	36.4925	38.8164	1.32833	202199_s_at	SFRS protein kinase 1
ABHD2	0.0003291	0.0100298	87.7804	159.863	138.734	1.58047	109.233	118.203	116.335	1.32529	205566_at	abhydrolase domain containing 2
LRP10	1.04e-05	0.0007152	793.196	1273.77	1326.63	1.67252	1143.95	1239.28	1048.03	1.32128	201412_at	low density lipoprotein receptor-related protein 10
AK3L1	1.34e-05	0.0008579	6.10035	8.20284	6.8656	1.12544	7.7747	8.06103	8.05316	1.32012	225342_at	adenylate kinase 3-like 1
NA	9.41e-05	0.0038859	180.773	68.8844	116.397	-1.55307	191.977	187.765	238.113	1.3172	243366_s_at	NA
ASF1B	0.0003858	0.0113346	54.5472	92.6633	123.24	2.25933	90.3379	83.5091	71.6501	1.31354	218115_at	ASF1 anti-silencing function 1 homolog B (S. cerevisiae)
NA	0.0004024	0.0117028	143.22	329.88	208.671	1.457	185.497	205.476	187.887	1.31188	230395_at	NA
OPLAH	0.0008885	0.0204801	24.6288	60.9451	32.4377	1.31707	29.3338	34.4738	32.2097	1.30781	222025_s_at	5-oxoprolinase (ATP-hydrolysing)
PDK3	0.0005151	0.0140185	57.577	114.631	86.3479	1.4997	64.5305	79.0714	75.1446	1.30512	221957_at	pyruvate dehydrogenase kinase, isozyme 3
RAB31	0.0008452	0.0197063	1131.45	1733.69	1490.43	1.31727	1482.85	1471.32	1469.92	1.29914	217762_s_at	RAB31, member RAS oncogene family
POMP	0.0008213	0.0192972	2.92778	3.24718	3.84533	1.31339	3.26558	3.60595	3.7897	1.29439	222402_at	proteasome maturation protein
CASP9	0.0003901	0.0114424	100.918	141.696	143.429	1.42125	128.394	125.654	130.258	1.29074	203984_s_at	caspase 9, apoptosis-related cysteine peptidase
CSPG4LYP1	0.0003654	0.0108755	9.23023	12.5293	11.8859	1.28771	10.922	9.30722	11.9039	1.28966	211461_at	chondroitin sulfate proteoglycan 4-like, Y-linked pseudogene 1
NA	9.53e-05	0.0039236	39.2815	70.8098	49.9191	1.2708	51.5846	47.1808	50.2899	1.28025	239117_at	NA
ARL1	0.000132	0.0050717	5.61554	6.51187	6.03914	1.07543	6.58341	5.22208	7.15729	1.27455	201657_at	ADP-ribosylation factor-like 1
MSRB2	7.62e-05	0.0033144	472.056	1006.03	762.239	1.61472	658.318	585.777	600.696	1.27251	218773_s_at	methionine sulfoxide reductase B2
FLJ20674	0.0002108	0.0071844	6.94673	15.5963	8.96327	1.29029	10.0169	9.95169	8.78584	1.26475	220137_at	hypothetical protein FLJ20674
DIRC2	0.0003426	0.0103319	9.64026	17.559	13.8997	1.44184	15.2512	12.9088	12.1637	1.26176	229213_at	disrupted in renal carcinoma 2
NA	0.0002056	0.0070655	340.589	480.842	525.802	1.5438	470.732	463.5	428.216	1.25728	227252_at	NA
MSRB2	0.0002917	0.0091638	109.58	276.412	157.513	1.43743	149.071	144.146	136.859	1.24894	219451_at	methionine sulfoxide reductase B2
TREML2	1.5e-05	0.0009341	71.9084	129.874	155.859	2.16746	123.953	136.312	89.8031	1.24885	219748_at	triggering receptor expressed on myeloid cells-like 2
SLC40A1	3.65e-05	0.0018738	41.0332	100.781	50.1758	1.22281	72.9504	66.8606	51.0749	1.24472	233123_at	solute carrier family 40 (iron-regulated transporter), member 1
DEFA1	2.86e-05	0.0015376	2071.83	8449.6	6102.04	2.94524	5374.39	2880.46	2572.9	1.24185	205033_s_at	defensin, alpha 1
UNC13D	0.0005342	0.0143455	26.9261	39.0056	38.0835	1.41437	32.7679	24.2861	33.3084	1.23703	228352_at	unc-13 homolog D (C. elegans)
OSBPL2	7.25e-05	0.0031916	100.968	155.023	142.883	1.41513	120.989	129.921	124.588	1.23394	209221_s_at	oxysterol binding protein-like 2
CEACAM3	1.05e-05	0.0007203	204.023	468.546	365.503	1.79148	301.346	260.706	251.263	1.23154	210789_x_at	carcinoembryonic antigen-related cell adhesion molecule 3
PNPLA1	2.4e-06	0.0002294	5.00977	12.5283	6.7368	1.34473	5.31167	5.91524	6.16876	1.23135	1553364_at	patatin-like phospholipase domain containing 1
MPO	0.0004388	0.0125281	24.7512	118.539	59.7559	2.41426	54.5635	32.3726	30.469	1.23101	203949_at	myeloperoxidase
HIST1H2AJ	1.48e-05	0.0009258	43.2905	68.3796	71.029	1.64075	54.5481	45.5411	53.269	1.2305	208583_x_at	histone cluster 1, H2aj
NA	0.0009282	0.021172	195.93	302.209	284.012	1.44956	253.822	263.118	240.408	1.22701	228037_at	NA
NDST1	0.0001226	0.004788	22.5729	35.5542	32.2622	1.42925	25.7383	27.0861	27.6653	1.2256	1554010_at	N-deacetylase/N-sulfotransferase (heparan glucosaminyl) 1
RTN2	5.75e-05	0.002653	30.2432	59.4251	36.3568	1.20215	36.1624	30.0442	37.0385	1.22469	34408_at	reticulon 2
LRRC16A	0.0006484	0.0163069	8.0392	10.2126	9.58591	1.1924	7.77194	9.51845	9.84005	1.22401	1562939_at	leucine rich repeat containing 16A
SMC6	0.000702	0.0172736	5.78293	5.72206	6.98627	1.20808	5.53966	5.22208	7.05711	1.22034	236535_at	structural maintenance of chromosomes 6
SIRPD	0.0001212	0.0047537	22.0671	37.1837	31.9853	1.44946	29.6667	25.601	26.9181	1.21983	232891_at	signal-regulatory protein delta
DYSF	6.49e-05	0.0029253	517.045	1016.56	727.331	1.40671	628.815	609.174	630.555	1.21953	218660_at	dysferlin, limb girdle muscular dystrophy 2B (autosomal recessive)
NA	0.0001389	0.0052483	29.592	85.9788	50.1914	1.69611	40.3864	38.0781	35.9704	1.21554	1569263_at	NA
AATK	8.39e-05	0.0035726	179.942	293.065	280.563	1.55918	238.975	226.845	218.602	1.21484	205986_at	apoptosis-associated tyrosine kinase
LIN7A	0.0009923	0.0222144	18.1251	34.9598	32.8506	1.81244	27.4165	23.4742	22.005	1.21407	206440_at	lin-7 homolog A (C. elegans)
LOC100131170	0.0003013	0.009376	17.2901	45.8191	27.3797	1.58355	24.8917	19.8045	20.98	1.21341	1556145_a_at	hypothetical LOC100131170
GRB10	8.92e-05	0.0037201	25.5509	66.997	47.0361	1.84087	31.2678	36.4357	30.9881	1.2128	209409_at	growth factor receptor-bound protein 10
HOMER3	0.000201	0.0069292	75.2516	139.464	84.628	1.1246	91.9264	85.2824	91.1047	1.21067	204647_at	homer homolog 3 (Drosophila)
SLC19A1	0.0003978	0.0116184	274.853	519.903	382.731	1.39249	345.481	309.794	332.603	1.21011	211576_s_at	solute carrier family 19 (folate transporter), member 1
YIPF3	2.2e-06	0.0002156	198.041	319.091	351.044	1.77258	254.381	273.993	238.738	1.2055	216338_s_at	Yip1 domain family, member 3
SEPX1	9.37e-05	0.0038723	2682.27	4147.18	3708.37	1.38255	3418.94	3326.53	3231.68	1.20483	217977_at	selenoprotein X, 1
NFAM1	9.73e-05	0.0039969	435.535	811.723	671.201	1.54109	536.67	581.102	522.504	1.19968	243099_at	NFAT activating protein with ITAM motif 1
NA	0.0005537	0.014703	888.753	1807.91	1416.7	1.59403	1364.74	1369.55	1065.68	1.19908	232555_at	NA
FKBP9	2e-07	3.18e-05	40.984	92.8519	61.606	1.50317	53.1154	54.3236	48.9503	1.19437	212169_at	FK506 binding protein 9, 63 kDa
UPB1	3.02e-05	0.0016078	18.9947	47.1594	27.2669	1.4355	21.3097	19.7525	22.5685	1.18815	220507_s_at	ureidopropionase, beta
TFE3	0.0005223	0.014144	121.522	163.522	178.226	1.46662	162.749	197.451	144.277	1.18725	206649_s_at	transcription factor binding to IGHM enhancer 3
STAT5B	0.0008161	0.0192234	58.0021	86.7621	82.1728	1.41672	69.8655	57.6772	68.5692	1.18218	205026_at	signal transducer and activator of transcription 5B
NA	0.0008202	0.0192879	9.22731	13.823	11.3946	1.23488	11.3289	10.6665	10.8734	1.1784	1556453_at	NA
GRHL1	0.0003054	0.0094658	3.52402	3.64475	4.81215	1.36553	3.88812	3.48714	4.15251	1.17834	222830_at	grainyhead-like 1 (Drosophila)
RARA	0.0008328	0.0195087	4.84682	5.97651	7.52101	1.55174	5.98119	4.91721	5.68082	1.17207	1565358_at	retinoic acid receptor, alpha
TIMP2	0.0003635	0.0108662	218.477	416.099	357.154	1.63475	289.132	265.737	256.004	1.17177	203167_at	TIMP metallopeptidase inhibitor 2
DAPK2	5.08e-05	0.0023923	43.804	88.9922	86.0713	1.96492	63.667	58.2475	51.2664	1.17036	206324_s_at	death-associated protein kinase 2
CCR5	< 1e-07	< 1e-07	65.4801	22.7996	37.9843	-1.72387	57.1989	70.9429	76.41	1.16692	206991_s_at	chemokine (C-C motif) receptor 5
NA	0.0007567	0.0182298	5.04786	4.64659	6.11638	1.21168	4.68072	4.82986	5.88053	1.16495	231576_at	NA
NA	0.0006719	0.016721	4.38147	5.68975	5.27648	1.20427	5.3845	6.08907	5.09583	1.16304	1561572_at	NA
SYTL2	0.00044	0.0125428	18.2287	7.06798	11.5588	-1.57704	14.3853	19.9583	21.1776	1.16177	232914_s_at	synaptotagmin-like 2
CLTCL1	2.95e-05	0.0015766	16.8777	38.1805	26.1744	1.55083	25.0789	19.8487	19.5867	1.16051	205944_s_at	clathrin, heavy chain-like 1
SLC19A1	2.8e-05	0.0015113	66.7696	134.669	107.085	1.60379	82.1973	92.1628	77.4518	1.15999	209777_s_at	solute carrier family 19 (folate transporter), member 1
MEIS3P1	1.35e-05	0.0008613	8.34357	11.4671	12.0334	1.44224	10.4857	8.45712	9.60078	1.15068	214077_x_at	Meis homeobox 3 pseudogene 1
MXD1	0.0005214	0.0141336	11.6525	23.5945	23.9074	2.05169	15.2308	11.0881	13.369	1.1473	206877_at	MAX dimerization protein 1
TALDO1	0.0008572	0.0199606	3061.45	4371.03	4456.8	1.45578	3932.2	3879.72	3497.25	1.14235	201463_s_at	transaldolase 1
AGTRAP	3.6e-06	0.0003149	45.3268	103.975	56.0489	1.23655	48.2095	51.7237	51.664	1.13981	238135_at	angiotensin II receptor-associated protein
ORAI2	0.0003641	0.0108723	109.856	182.799	185.274	1.68653	170.324	131.816	124.82	1.13622	218812_s_at	ORAI calcium release-activated calcium modulator 2
CEACAM3	4.41e-05	0.0021452	194.781	444.783	327.21	1.67989	265.767	226.591	221.292	1.13611	208052_x_at	carcinoembryonic antigen-related cell adhesion molecule 3
CBLB	0.0006213	0.0158614	5.89187	3.58055	4.59446	-1.28238	5.24257	6.51235	6.6819	1.13409	227900_at	Cas-Br-M (murine) ecotropic retroviral transforming sequence b
DAPK2	1e-06	0.0001186	89.7613	181.779	173.96	1.93803	104.761	138.775	101.667	1.13264	215184_at	death-associated protein kinase 2
MCF2L	0.0001253	0.0048691	6.08841	7.98615	8.5962	1.4119	6.61448	8.35326	6.88541	1.13091	1552743_at	MCF.2 cell line derived transforming sequence-like
CHIT1	2.18e-05	0.0012442	13.4257	38.1425	24.0058	1.78804	19.1979	16.1507	15.0947	1.12431	208168_s_at	chitinase 1 (chitotriosidase)
CLEC2L	3.7e-05	0.0018942	24.186	36.3544	36.3788	1.50412	32.4518	25.0108	27.12	1.12131	232173_at	C-type lectin domain family 2, member L
NA	0.0003177	0.0097916	101.421	148.273	117.587	1.15939	109.859	106.45	113.567	1.11975	235659_at	NA
GBA	0.0001468	0.0054899	114.94	157.828	128.684	1.11957	111.711	97.2219	128.701	1.11972	209093_s_at	glucosidase, beta; acid (includes glucosylceramidase)
MYO7B	0.0006056	0.0156111	61.3145	106.515	106.971	1.74463	80.97	74.1771	68.5836	1.11856	235383_at	myosin VIIB
ABHD4	0.0005161	0.0140356	25.1639	38.0712	37.7359	1.49961	31.9143	35.0731	28.1413	1.11832	242023_at	abhydrolase domain containing 4
CTSG	0.0004868	0.0134832	15.7109	115.24	58.0861	3.69719	52.4436	23.8442	17.5565	1.11747	205653_at	cathepsin G
LOC286297	0.0006022	0.0155602	3.09072	3.94487	3.90458	1.26332	3.55914	3.83295	3.44929	1.11602	1556704_s_at	hypothetical protein LOC286297
ICAM1	0.0005651	0.0149044	66.2815	139.595	76.2331	1.15014	76.7985	83.4236	73.9425	1.11558	202638_s_at	intercellular adhesion molecule 1
KIAA0319	0.00038	0.0111942	14.5591	22.0969	19.96	1.37096	16.5814	16.5139	16.192	1.11216	206017_at	KIAA0319
NA	0.0008262	0.0193707	31.4568	12.8973	17.7933	-1.7679	27.5447	29.3049	34.9506	1.11107	230383_x_at	NA
B9D2	0.0008627	0.0200312	75.9664	125.925	108.756	1.43163	88.0372	82.4824	84.3382	1.1102	219766_at	B9 protein domain 2
UCA1	0.0007877	0.0187331	11.1775	14.7311	11.0402	-1.01244	9.9407	12.7564	12.4026	1.1096	227919_at	urothelial cancer associated 1
PDXK	0.0003302	0.0100522	107.102	170.539	112.054	1.04623	107.903	102.53	118.826	1.10947	218018_at	pyridoxal (pyridoxine, vitamin B6) kinase
ELA2	8.4e-06	0.0006107	34.215	309.803	158.369	4.62863	108.719	48.7863	37.8815	1.10716	206871_at	elastase 2, neutrophil
SH3RF2	0.0005236	0.0141609	4.37116	4.56146	5.6708	1.29732	4.96254	5.42091	4.83065	1.10512	235768_at	SH3 domain containing ring finger 2
LOC644090	1.14e-05	0.000761	13.0477	18.7524	14.2218	1.08998	13.0938	14.2401	14.4189	1.10509	1562749_at	hypothetical LOC644090
RP1-21O18.1	6.08e-05	0.0027702	14.2282	22.3934	22.534	1.58376	15.9505	17.5199	15.7053	1.10382	215138_s_at	kazrin
MPO	0.0002088	0.0071395	12.724	36.3792	25.8584	2.03225	20.6335	15.4214	14.0284	1.10252	203948_s_at	myeloperoxidase
TRHR	0.0004823	0.0134185	6.86126	9.50357	7.95038	1.15873	8.13622	6.85941	7.54384	1.09948	211438_at	thyrotropin-releasing hormone receptor
SH2D1B	0.0008031	0.0190084	46.7825	19.8294	23.1828	-2.01798	35.1516	48.7085	51.4052	1.09881	1553177_at	SH2 domain containing 1B
PSG1	0.000956	0.0216346	7.14655	7.84426	8.72581	1.22098	6.71544	7.29493	7.83093	1.09576	210195_s_at	pregnancy specific beta-1-glycoprotein 1
CPA3	0.0006835	0.0169453	17.3472	19.2693	77.4709	4.46589	33.0396	15.1395	18.9919	1.09481	205624_at	carboxypeptidase A3 (mast cell)
RLBP1L2	0.0003884	0.0113987	3.79875	4.36296	4.0532	1.06698	4.06984	5.00118	4.15175	1.09292	1562443_at	retinaldehyde binding protein 1-like 2
GABARAP	0.0007696	0.0184633	3760.36	4393.4	4399.82	1.17005	4156.44	4144.76	4107.98	1.09244	200645_at	GABA(A) receptor-associated protein
QSOX1	0.0002294	0.0076107	125.434	229.551	152.906	1.21901	145.97	140.459	136.851	1.09101	201482_at	quiescin Q6 sulfhydryl oxidase 1
FER1L4	0.0001757	0.0062828	6.73667	10.0926	7.30692	1.08465	9.13031	7.55406	7.3312	1.08825	220388_at	fer-1-like 4 (C. elegans)
TTYH2	0.0008164	0.0192234	81.9495	63.0892	55.6983	-1.47131	63.0975	76.9262	88.8021	1.08362	223741_s_at	tweety homolog 2 (Drosophila)
LMTK2	0.0002174	0.0073102	4.10448	5.92807	4.84751	1.18103	4.67974	4.2797	4.44704	1.08346	235307_at	lemur tyrosine kinase 2
SRA1	0.0007797	0.0186239	280.141	409.136	294.351	1.05073	301.626	273.767	301.726	1.07705	224864_at	steroid receptor RNA activator 1
GIMAP6	4.3e-05	0.0021219	117.268	44.1902	62.4405	-1.87807	88.7005	115.06	126.225	1.07638	229367_s_at	GTPase, IMAP family member 6
GHRL	2.6e-06	0.0002443	28.0936	73.8277	44.326	1.5778	38.467	31.4243	30.2326	1.07614	237647_at	ghrelin/obestatin prepropeptide
HIST1H2AK	0.0001389	0.0052483	4.99405	4.96317	7.14088	1.42988	5.17414	6.31457	5.36671	1.07462	239041_at	histone cluster 1, H2ak
LST1	0.0005261	0.0142117	2048.97	3087.61	2469.01	1.205	2303.76	2150.76	2197.12	1.07231	215633_x_at	leukocyte specific transcript 1
NA	0.000396	0.0115844	6.56044	10.5151	8.07902	1.23148	7.05416	7.00583	7.02945	1.07149	1570285_at	NA
S100A9	0.0008659	0.0200676	7293.68	9594.35	8137.75	1.11573	8111.27	7268.24	7809.92	1.07078	203535_at	S100 calcium binding protein A9
CD24	1.1e-06	0.0001266	12.0249	21.8637	25.5986	2.1288	17.8179	12.6991	12.8714	1.0704	209772_s_at	CD24 molecule
SFXN5	0.0005792	0.015152	101.335	155.996	106.174	1.04775	106.65	101.835	108.43	1.07002	226373_at	sideroflexin 5
SLC45A3	0.000974	0.0219421	37.29	40.3247	70.0111	1.87748	39.2569	41.0068	39.8866	1.06963	228696_at	solute carrier family 45, member 3
OSBPL2	0.0005348	0.0143545	171.665	244.587	269.14	1.56783	195.249	198.025	182.7	1.06428	209222_s_at	oxysterol binding protein-like 2
CEACAM4	1.3e-05	0.0008412	163.314	293.081	257.842	1.57881	216.159	175.456	173.608	1.06303	207205_at	carcinoembryonic antigen-related cell adhesion molecule 4
FLOT2	0.0005959	0.0154999	590.891	886.204	743.199	1.25776	687.392	696.196	628.099	1.06297	201350_at	flotillin 2
ORAI2	0.0002604	0.0083947	130.21	228.547	173.209	1.33023	149.592	138.426	138.079	1.06044	231406_at	ORAI calcium release-activated calcium modulator 2
NA	0.0009713	0.021897	9.79829	10.6091	12.0446	1.22925	8.94989	9.25416	10.3758	1.05894	234585_at	NA
ANPEP	2.1e-06	0.0002091	395.529	911.848	554.602	1.40218	453.618	462.484	418.711	1.05861	202888_s_at	alanyl (membrane) aminopeptidase
NCF1B	0.0002768	0.0087989	2130.67	3829.59	2726.01	1.27941	2172.22	2192.4	2252.07	1.05698	214084_x_at	neutrophil cytosolic factor 1B pseudogene
CETP	0.0001794	0.0063693	10.2887	20.9305	15.6341	1.51953	11.387	11.4659	10.8704	1.05653	206210_s_at	cholesteryl ester transfer protein, plasma
CDH15	0.0001794	0.0063693	18.008	24.6598	19.7363	1.09597	19.1716	14.2357	19.0135	1.05584	206327_s_at	cadherin 15, type 1, M-cadherin (myotubule)
NA	0.0004418	0.0125744	16.0066	36.3389	22.1429	1.38337	18.0836	15.219	16.8909	1.05525	1566455_at	NA
NOL3	0.0008394	0.0196129	16.7963	22.0902	15.8067	-1.06261	16.8472	18.2712	17.6893	1.05317	59625_at	nucleolar protein 3 (apoptosis repressor with CARD domain)
PHF20	0.0007893	0.018763	20.5419	26.2265	25.8346	1.25765	22.1215	16.9494	21.6113	1.05206	1569906_s_at	PHD finger protein 20
TMEM91	0.0004451	0.0126486	166.812	348.225	215.99	1.29482	202.478	193.481	174.911	1.04856	229957_at	transmembrane protein 91
NA	0.000538	0.0144051	9.73872	14.9307	15.2868	1.56969	11.8555	11.0697	10.2072	1.0481	221148_at	NA
GGT5	0.0004843	0.0134412	18.6398	42.9862	25.8778	1.38831	22.3846	20.071	19.5089	1.04662	205582_s_at	gamma-glutamyltransferase 5
C12orf66	0.0004496	0.0127632	6.4573	4.11546	4.79114	-1.34776	6.22858	6.40627	6.74202	1.04409	1554067_at	chromosome 12 open reading frame 66
B3GNT8	0.0007811	0.018641	101.257	198.671	140.768	1.39021	121.415	117.098	105.654	1.04343	237338_at	UDP-GlcNAc:betaGal beta-1,3-N-acetylglucosaminyltransferase 8
JMJD2B	0.0006302	0.0160112	511.634	755.488	686.94	1.34264	547.828	587.833	531.527	1.03888	212496_s_at	jumonji domain containing 2B
DBN1	0.0006705	0.0166938	50.4457	91.6217	68.1331	1.35062	50.3855	50.4977	52.3228	1.03721	202806_at	drebrin 1
TMEM88	0.0005106	0.0139446	44.6534	72.38	60.1038	1.34601	46.8413	51.0652	46.3085	1.03707	229452_at	transmembrane protein 88
SPEM1	0.0001143	0.0045351	8.46428	12.308	11.811	1.39539	12.0113	9.56274	8.77312	1.03649	240878_at	spermatid maturation 1
AURKB	0.0004716	0.0131824	14.6237	19.6687	16.896	1.15538	16.6665	13.1568	15.1546	1.03631	209464_at	aurora kinase B
NA	0.0002695	0.0086068	9.78036	12.7871	9.45977	-1.03389	9.63477	9.5782	10.1158	1.03429	235785_at	NA
SIRPA	6.59e-05	0.0029533	115.186	207.417	164.969	1.4322	148.944	125.62	119.027	1.03335	202896_s_at	signal-regulatory protein alpha
NA	7.53e-05	0.0032805	5.19079	6.77521	5.94204	1.14473	5.26767	5.87281	5.36278	1.03313	235111_at	NA
NA	4.34e-05	0.0021339	39.5444	19.1748	27.5939	-1.43308	32.2669	36.9086	40.8147	1.03213	240173_at	NA
SH2D1A	0.0004043	0.0117518	33.2312	9.91497	19.695	-1.68729	25.0659	28.5518	34.2247	1.0299	210116_at	SH2 domain protein 1A
AGTRAP	0.0002353	0.007764	847.973	1400.82	950.598	1.12102	923.65	857.969	872.338	1.02873	225059_at	angiotensin II receptor-associated protein
ECE1	0.0006342	0.0160755	105.765	179.441	127.954	1.2098	120.23	114.56	108.477	1.02564	201749_at	endothelin converting enzyme 1
NA	3.95e-05	0.001985	156.79	284.682	239.721	1.52893	174.051	156.127	160.572	1.02412	228918_at	NA
PBRM1	0.0009455	0.0214414	10.5774	10.6841	13.7312	1.29816	11.2484	12.3555	10.7983	1.02089	223899_at	polybromo 1
ARNT	0.0006541	0.0163975	11.3842	12.5881	10.54	-1.08009	8.34042	13.2029	11.5892	1.01801	231016_s_at	aryl hydrocarbon receptor nuclear translocator
SNX21	0.000397	0.0116075	29.2432	41.0962	31.5279	1.07813	32.6281	28.047	29.7586	1.01762	226595_at	sorting nexin family member 21
NA	0.0001936	0.0067164	3.83659	4.14285	4.75625	1.23971	3.54805	4.13389	3.90079	1.01673	1556250_at	NA
NA	3.1e-05	0.0016376	22.2075	25.678	27.1153	1.221	22.1878	30.8644	22.5294	1.0145	1559924_at	NA
USP49	0.0002987	0.009311	3.89017	4.22094	5.07232	1.30388	4.01693	4.78653	3.94611	1.01438	1564029_at	ubiquitin specific peptidase 49
BEX1	0.0001924	0.006696	11.7618	25.2142	22.3657	1.90155	14.6587	12.2025	11.927	1.01404	218332_at	brain expressed, X-linked 1
C1orf183	4.4e-05	0.0021452	148.216	223.797	282.212	1.90406	210.523	197.563	150.209	1.01345	229382_at	chromosome 1 open reading frame 183
LRRC8C	0.0002084	0.0071303	36.997	17.3976	18.7077	-1.97764	30.0661	43.1716	37.474	1.01289	228314_at	leucine rich repeat containing 8 family, member C
PRTN3	0.0009625	0.0217278	6.60814	16.8315	10.0636	1.52291	9.86205	7.86966	6.68041	1.01094	207341_at	proteinase 3
IL1R2	4.9e-05	0.0023296	400.062	1054.36	666.868	1.66691	534.8	547.418	404.242	1.01045	205403_at	interleukin 1 receptor, type II
ABI2	0.0002695	0.0086068	5.7015	6.37058	7.65279	1.34224	5.86914	7.398	5.76008	1.01028	227631_at	abl interactor 2
MDFIC	0.0001505	0.0055824	16.3201	12.9885	13.6568	-1.19502	14.3041	10.4694	16.4679	1.00905	239172_x_at	MyoD family inhibitor domain containing
NA	0.0002246	0.007497	6.08	8.15236	5.13592	-1.18382	5.52507	5.34616	6.12723	1.00777	238548_at	NA
C20orf107	0.0006642	0.0165721	23.8373	39.0394	30.7314	1.28921	25.8511	25.3324	24.0034	1.00697	232513_x_at	chromosome 20 open reading frame 107
NA	0.0007663	0.0184165	5.5582	3.75951	4.29586	-1.29385	4.2681	4.98364	5.59235	1.00614	243729_at	NA
LSDP5	0.0006241	0.015908	100.344	208.914	131.74	1.31288	119.723	120.084	100.748	1.00402	241368_at	lipid storage droplet protein 5
GBAP	1.8e-06	0.0001867	143.224	216.265	140.296	-1.02087	131.209	121.538	143.332	1.00075	210589_s_at	glucosidase, beta; acid, pseudogene
LOC553158	6.71e-05	0.0030047	5.39316	7.61787	5.64566	1.04682	6.68408	5.3163	5.39493	1.00033	1555162_at	PRR5-ARHGAP8 fusion
KIAA1881	0.000137	0.005209	26.2731	42.3323	35.0089	1.3325	30.4294	30.4637	26.1314	-1.00542	228409_at	KIAA1881
RFTN1	0.0004073	0.0118139	203.655	93.2302	118.736	-1.71519	129.017	183.257	202.297	-1.00671	212646_at	raftlin, lipid raft linker 1
NA	0.0007449	0.0180449	4.29422	4.94471	5.4662	1.27292	4.46344	4.52805	4.26445	-1.00698	1560941_a_at	NA
LOC255130	0.0005031	0.0138087	3.01991	3.46236	3.81052	1.2618	3.17174	3.68546	2.99432	-1.00855	1557395_at	hypothetical LOC255130
LOC285771	0.0002624	0.0084145	27.1847	49.4738	29.5885	1.08842	25.4221	28.8211	26.9146	-1.01004	237870_at	hypothetical protein LOC285771
NA	1.12e-05	0.0007541	5.25084	6.34158	5.90068	1.12376	5.37313	7.40253	5.18523	-1.01265	229781_at	NA
DAAM2	1.3e-06	0.0001439	17.9445	40.2089	49.2308	2.7435	25.3073	19.9376	17.7016	-1.01372	212793_at	dishevelled associated activator of morphogenesis 2
PBX2	0.0007803	0.0186301	32.9148	48.5767	48.0948	1.46119	39.0555	37.6616	32.4314	-1.01491	211097_s_at	pre-B-cell leukemia homeobox 2
TFE3	0.0003779	0.0111384	6.46912	8.35128	8.01507	1.23897	6.5366	6.47289	6.37387	-1.01494	1565347_s_at	transcription factor binding to IGHM enhancer 3
HMGA2	0.0006054	0.0156111	2.82722	2.88121	3.11626	1.10224	2.88319	3.26251	2.77944	-1.01719	1568287_at	high mobility group AT-hook 2
NA	1.7e-05	0.0010316	45.8715	126.731	68.2778	1.48846	55.4319	48.6687	45.0476	-1.01829	236398_s_at	NA
BCL2L11	0.0006413	0.0161755	8.90502	11.6105	12.34	1.38573	9.69889	9.50059	8.74497	-1.0183	222343_at	BCL2-like 11 (apoptosis facilitator)
EHD1	0.0007577	0.0182338	381.903	532.112	401.069	1.05019	321.562	370.429	374.842	-1.01884	208112_x_at	EH-domain containing 1
ANO10	9.81e-05	0.0040177	63.4181	98.6601	67.7894	1.06893	67.1503	57.1179	62.2301	-1.01909	218910_at	anoctamin 10
FNIP2	0.000962	0.0217255	113.624	69.331	75.8814	-1.49739	105.105	126.829	111.389	-1.02007	226460_at	folliculin interacting protein 2
CYP27A1	0.000193	0.0067119	138.828	285.996	174.205	1.25483	145.884	132.992	136.038	-1.02051	203979_at	cytochrome P450, family 27, subfamily A, polypeptide 1
GLIS2	0.0002279	0.0075655	8.96948	12.581	11.4856	1.28053	10.2108	8.51635	8.75107	-1.02496	223378_at	GLIS family zinc finger 2
GRB10	< 1e-07	< 1e-07	37.8189	138.073	69.6205	1.84089	44.5809	45.4892	36.895	-1.02504	210999_s_at	growth factor receptor-bound protein 10
NA	0.0003567	0.0106805	6.83572	10.1462	6.90889	1.0107	7.03468	6.34067	6.64033	-1.02942	236399_at	NA
ADORA2A	0.0002901	0.0091293	129.202	167.761	100.185	-1.28963	99.0511	109.368	125.397	-1.03034	205013_s_at	adenosine A2a receptor
CAPN3	0.0006145	0.015737	125.765	145.606	87.9008	-1.43076	88.0271	95.1352	121.939	-1.03138	210944_s_at	calpain 3, (p94)
NA	0.0004356	0.0124433	6.00093	5.35534	5.82845	-1.02959	5.10963	4.5909	5.80967	-1.03292	1563958_at	NA
MAST3	0.00071	0.0174155	376.391	511.291	510.127	1.35531	437.213	434.072	364.224	-1.03341	213045_at	microtubule associated serine/threonine kinase 3
AGPAT2	0.0004934	0.0136246	52.5374	78.1734	57.4373	1.09326	54.3471	51.3183	50.721	-1.03581	210678_s_at	1-acylglycerol-3-phosphate O-acyltransferase 2 (lysophosphatidic acid acyltransferase, beta)
GRB10	4.93e-05	0.0023398	20.7292	43.9455	42.7194	2.06083	27.7042	25.1058	19.9969	-1.03662	209410_s_at	growth factor receptor-bound protein 10
TRIM14	8.6e-06	0.0006236	275.422	160.889	126.456	-2.178	186.311	220.119	265.464	-1.03751	203148_s_at	tripartite motif-containing 14
TRIM26	0.0008641	0.0200529	4.22497	3.23139	3.56358	-1.1856	3.51793	3.54636	4.0557	-1.04174	242618_at	tripartite motif-containing 26
ANAPC7	9.5e-06	0.0006668	157.449	136.544	120.856	-1.30278	123.846	136.985	150.516	-1.04606	225554_s_at	anaphase promoting complex subunit 7
RETN	3.3e-06	0.0002943	197.584	671.368	369.361	1.86939	272.902	166.808	188.473	-1.04834	220570_at	resistin
ADA	0.0002264	0.0075295	108.151	50.0736	63.6381	-1.69947	90.344	95.8476	102.783	-1.05222	216705_s_at	adenosine deaminase
TMEM120A	0.0001715	0.0061689	357.622	582.049	455.889	1.27478	406.989	354.828	339.414	-1.05365	223482_at	transmembrane protein 120A
TIAM1	0.0004548	0.0128774	145.442	73.1847	83.5473	-1.74084	95.7293	127.584	137.912	-1.05461	213135_at	T-cell lymphoma invasion and metastasis 1
GHRL	1.1e-06	0.0001266	49.3394	80.0549	71.146	1.44197	61.075	43.3963	46.5279	-1.06043	223862_at	ghrelin/obestatin prepropeptide
HIST1H1C	0.0002141	0.0072438	273.357	446.054	642.917	2.35193	448.41	334.24	257.618	-1.06109	209398_at	histone cluster 1, H1c
STARD10	0.0005014	0.0137828	23.8348	35.6692	30.1267	1.26398	25.3605	24.7451	22.3341	-1.06719	238911_at	StAR-related lipid transfer (START) domain containing 10
NA	7.5e-06	0.0005579	7.24678	4.34754	4.66712	-1.55273	5.42649	6.32828	6.78908	-1.06742	238378_at	NA
GGT1	0.0007353	0.0178678	64.0811	123.563	91.2293	1.42365	73.1034	62.3463	60.0313	-1.06746	211417_x_at	gamma-glutamyltransferase 1
SENP1	9.17e-05	0.003804	5.60472	5.39008	6.65621	1.18761	6.00037	5.03548	5.24029	-1.06954	1552812_a_at	SUMO1/sentrin specific peptidase 1
M6PR	3.6e-05	0.0018551	475.105	283.69	302.414	-1.57104	373.772	453.843	443.595	-1.07103	200901_s_at	mannose-6-phosphate receptor (cation dependent)
NCAM1	7e-06	0.0005316	48.349	19.9427	25.573	-1.89063	38.206	46.0311	45.0833	-1.07244	227394_at	neural cell adhesion molecule 1
INHBB	0.0001233	0.004805	12.9223	22.6946	18.4607	1.42859	13.8172	12.1892	12.0443	-1.0729	205258_at	inhibin, beta B
SMR3B	8.41e-05	0.0035783	3.99913	4.65119	4.21527	1.05405	3.95511	4.19011	3.72497	-1.0736	207441_at	submaxillary gland androgen regulated protein 3B
JAKMIP3	0.000117	0.0046221	6.6167	8.23423	5.51733	-1.19926	5.45679	6.25455	6.15809	-1.07447	233076_at	janus kinase and microtubule interacting protein 3
JMJD6	0.0004715	0.0131824	145.156	166.657	131.238	-1.10605	119.733	122.295	134.598	-1.07844	212723_at	jumonji domain containing 6
RP1-21O18.1	0.0003356	0.0101712	14.6039	19.3807	17.543	1.20126	15.8828	14.1287	13.5271	-1.0796	213752_at	kazrin
LOC115110	0.0008974	0.0206116	58.4507	82.3903	58.805	1.00606	53.5286	56.1657	54.0415	-1.08159	232190_x_at	hypothetical protein LOC115110
NA	1.8e-05	0.0010803	34.5354	13.5625	19.754	-1.74827	25.4451	27.8666	31.8938	-1.08283	227531_at	NA
NA	9.56e-05	0.003933	95.6452	42.2796	48.6402	-1.96638	64.2179	79.6959	88.2064	-1.08433	226348_at	NA
IL2RB	1.1e-06	0.0001266	426.128	70.3805	189.642	-2.24701	297.902	418.301	392.593	-1.08542	205291_at	interleukin 2 receptor, beta
NA	0.0008233	0.0193276	33.3626	22.4603	22.6397	-1.47363	25.4255	30.7106	30.7049	-1.08656	228650_at	NA
PDXK	0.0007856	0.0187138	194.17	310.729	189.299	-1.02573	182.765	158.737	178.603	-1.08716	202671_s_at	pyridoxal (pyridoxine, vitamin B6) kinase
IL1R2	0.0001993	0.0068923	214.527	600.636	409.763	1.91007	302.627	270.053	197.315	-1.08723	211372_s_at	interleukin 1 receptor, type II
KLF12	3.62e-05	0.0018637	26.8227	6.81271	12.3007	-2.18058	18.2692	23.3206	24.6531	-1.088	227261_at	Kruppel-like factor 12
NA	0.0008797	0.0203201	8.32592	9.48303	7.59589	-1.09611	6.63187	5.8586	7.64988	-1.08837	236063_at	NA
NA	8.88e-05	0.0037062	14.7769	8.24337	11.4501	-1.29055	10.2416	14.9439	13.5703	-1.08891	235422_at	NA
NA	1e-07	1.75e-05	27.0169	11.1311	13.1731	-2.05091	17.4348	17.946	24.7973	-1.08951	237753_at	NA
NA	0.000148	0.005516	49.3357	24.992	24.7339	-1.99466	50.4146	51.1194	45.1652	-1.09234	1562067_at	NA
NA	0.0003284	0.0100141	17.5903	20.4638	21.6042	1.22819	17.741	19.3845	16.0595	-1.09532	243596_at	NA
NNT	0.0002132	0.0072312	12.8975	7.39599	10.3866	-1.24174	11.8872	12.652	11.762	-1.09654	238530_at	nicotinamide nucleotide transhydrogenase
TTC4	0.0002952	0.0092313	40.8215	29.5128	25.7248	-1.58686	30.9943	39.1213	37.0642	-1.10137	46167_at	tetratricopeptide repeat domain 4
PTCD3	0.0002056	0.0070655	23.3202	12.8097	14.6944	-1.58701	16.0958	20.1141	21.1383	-1.10322	228020_at	Pentatricopeptide repeat domain 3
PPARGC1A	0.0003694	0.0109528	4.3948	5.3894	5.00376	1.13856	4.73388	5.34058	3.98102	-1.10394	1569141_a_at	peroxisome proliferator-activated receptor gamma, coactivator 1 alpha
AHSA1	0.0005955	0.0154995	262.66	200.185	189.274	-1.38773	199.901	222.693	237.875	-1.10419	201491_at	AHA1, activator of heat shock 90kDa protein ATPase homolog 1 (yeast)
SOX10	0.0003269	0.0099795	8.57397	10.7677	7.86688	-1.08988	6.87632	7.99725	7.74011	-1.10773	209842_at	SRY (sex determining region Y)-box 10
CCT4	0.000785	0.0187096	335.923	158.171	190.187	-1.76628	247.734	287.731	302.836	-1.10926	200877_at	chaperonin containing TCP1, subunit 4 (delta)
VPRBP	1.1e-05	0.0007434	83.8874	49.1462	50.9503	-1.64646	62.2687	70.7949	75.5997	-1.10963	226481_at	Vpr (HIV-1) binding protein
NA	0.0007834	0.0186796	5.30689	4.46719	4.28527	-1.2384	4.01989	4.33017	4.7758	-1.1112	231171_at	NA
WDR4	0.0009925	0.0222144	21.387	13.7296	12.5053	-1.71024	14.1446	18.7142	19.2431	-1.11141	241937_s_at	WD repeat domain 4
NA	0.00034	0.0102704	15.3789	17.1951	16.6766	1.08438	13.0184	17.5989	13.829	-1.11208	1561133_at	NA
CEP78	0.000986	0.0221213	28.5214	13.9259	19.2939	-1.47826	18.6037	24.2391	25.6156	-1.11344	228774_at	centrosomal protein 78kDa
BTN3A3	3.06e-05	0.0016243	1188.5	760.61	647.093	-1.83668	779.201	1047.65	1063.13	-1.11793	204820_s_at	butyrophilin, subfamily 3, member A3
CNDP2	0.0003459	0.0104141	410.137	263.65	183.059	-2.24047	250.709	292.858	366.785	-1.11819	217752_s_at	CNDP dipeptidase 2 (metallopeptidase M20 family)
CLIC5	0.000464	0.0130433	5.32717	3.67553	3.69287	-1.44255	4.44203	3.88775	4.76174	-1.11874	213317_at	chloride intracellular channel 5
NA	0.0006017	0.0155602	55.4653	25.6772	28.782	-1.92708	37.1323	45.6837	49.5703	-1.11892	236401_at	NA
LOC200772	7e-07	8.86e-05	91.5293	26.3778	34.9805	-2.61658	46.5037	53.0605	81.7682	-1.11937	241525_at	hypothetical protein LOC200772
TMEM41A	0.0006201	0.015843	22.5007	13.823	13.3451	-1.68606	18.8753	20.2455	20.0955	-1.11969	225991_at	transmembrane protein 41A
NA	0.0003209	0.0098458	3.81804	5.26857	4.12874	1.08138	4.08297	3.95896	3.40749	-1.12049	1568732_at	NA
GZMK	4e-07	5.79e-05	242.762	26.4241	98.8124	-2.4568	210.131	252.112	216.58	-1.12089	206666_at	granzyme K (granzyme 3; tryptase II)
NA	8.86e-05	0.0037062	9.69356	14.8898	10.8502	1.11932	9.76865	9.84078	8.64731	-1.12099	236901_at	NA
C2orf43	0.0005314	0.0142984	12.8102	7.80759	8.80107	-1.45553	11.7767	10.6426	11.4218	-1.12156	219008_at	chromosome 2 open reading frame 43
CLEC11A	0.0001186	0.0046785	50.7796	84.8197	48.2368	-1.05271	45.444	45.8025	45.2745	-1.12159	211709_s_at	C-type lectin domain family 11, member A
NA	2.9e-05	0.0015545	6.6521	4.10282	4.62639	-1.43786	5.39821	7.37041	5.92753	-1.12224	236935_at	NA
PDZD11	0.0004775	0.0133201	139.078	83.5894	96.2453	-1.44503	116.541	119.317	123.683	-1.12447	223037_at	PDZ domain containing 11
LDOC1L	2.22e-05	0.0012617	52.1119	21.5397	31.5704	-1.65066	32.5201	45.5823	46.3423	-1.1245	223228_at	leucine zipper, down-regulated in cancer 1-like
CCDC88B	0.0002972	0.0092801	231.191	309.203	236.559	1.02322	203.907	188.106	205.123	-1.12709	223663_at	coiled-coil domain containing 88B
NFKB2	0.0006357	0.0160986	94.515	138.8	92.7624	-1.01889	94.6973	86.4115	83.8405	-1.12732	209636_at	nuclear factor of kappa light polypeptide gene enhancer in B-cells 2 (p49/p100)
SOCS7	0.0002257	0.0075153	43.4423	26.1691	25.7801	-1.68511	26.7094	37.1185	38.4827	-1.12888	228662_at	suppressor of cytokine signaling 7
SOX11	3.94e-05	0.0019836	5.75461	7.2269	5.33053	-1.07956	4.98548	5.94454	5.09682	-1.12906	204915_s_at	SRY (sex determining region Y)-box 11
CREB3L2	0.000221	0.0074084	85.7836	51.4863	50.1785	-1.70957	72.1492	76.6101	75.8741	-1.1306	212345_s_at	cAMP responsive element binding protein 3-like 2
ZNF419	2.01e-05	0.0011791	26.9058	19.3558	16.4601	-1.63461	23.7172	22.068	23.7687	-1.13198	219826_at	zinc finger protein 419
PCCA	0.0005485	0.0146146	12.9662	9.05192	9.5706	-1.35479	10.9991	11.931	11.4475	-1.13266	203860_at	propionyl Coenzyme A carboxylase, alpha polypeptide
NA	0.0004559	0.012878	3.70194	4.33034	3.84489	1.03861	3.62837	4.01286	3.2669	-1.13317	244880_at	NA
XPO5	0.0008198	0.0192868	85.2015	59.4778	57.3073	-1.48675	67.9088	73.4636	75.1206	-1.1342	223056_s_at	exportin 5
FMNL3	0.0004639	0.0130433	14.5396	9.74366	10.8185	-1.34396	10.3899	14.0261	12.7964	-1.13623	238823_at	formin-like 3
MAP4	3.83e-05	0.0019389	85.8035	65.1111	56.6048	-1.51583	62.9589	63.9283	75.4591	-1.13709	33850_at	microtubule-associated protein 4
CTSO	0.0001012	0.0041077	78.9441	36.8374	48.0749	-1.64211	74.3551	68.731	69.3484	-1.13837	203758_at	cathepsin O
NA	0.0002372	0.0078032	5.96549	4.12832	4.37451	-1.36369	4.77608	4.16755	5.23975	-1.13851	238744_at	NA
RUFY3	7.64e-05	0.0033205	15.6987	8.10237	8.57692	-1.83034	9.6654	12.9021	13.7591	-1.14097	229334_at	RUN and FYVE domain containing 3
MAP4	0.0003765	0.0111151	58.3781	41.8106	38.0897	-1.53265	40.3364	50.9215	51.1029	-1.14236	243_g_at	microtubule-associated protein 4
NA	4.09e-05	0.0020422	29.5445	15.2085	14.9089	-1.98168	22.7438	24.5343	25.8601	-1.14248	222275_at	NA
C15orf44	7.02e-05	0.0031129	38.7542	27.035	27.6007	-1.4041	28.5403	36.3912	33.9193	-1.14254	221265_s_at	chromosome 15 open reading frame 44
ITFG2	0.000184	0.0064905	77.2427	49.6338	51.2389	-1.5075	57.9048	73.4232	67.5352	-1.14374	226295_at	integrin alpha FG-GAP repeat containing 2
NA	0.0005581	0.0147964	9.65517	6.60396	8.00529	-1.2061	7.82972	9.7074	8.43638	-1.14447	1558103_a_at	NA
C14orf169	8.47e-05	0.0035955	58.7319	30.936	38.8137	-1.51317	40.2541	50.1218	51.2888	-1.14512	219526_at	chromosome 14 open reading frame 169
KLKB1	0.0008595	0.0199847	39.2202	33.071	26.6928	-1.46932	31.1191	28.0071	34.2417	-1.1454	206541_at	kallikrein B, plasma (Fletcher factor) 1
DPAGT1	0.0003697	0.0109557	53.2216	36.0936	30.5885	-1.73992	36.4001	43.4601	46.4447	-1.14591	209509_s_at	dolichyl-phosphate (UDP-N-acetylglucosamine) N-acetylglucosaminephosphotransferase 1 (GlcNAc-1-P transferase)
RP1-21O18.1	9.1e-06	0.0006462	70.3031	322.69	241.098	3.42941	138.658	93.2859	61.2938	-1.14698	213478_at	kazrin
RPL30	0.0005852	0.0152871	3357.38	1638.49	2743.42	-1.22379	3322.62	3204.12	2926.13	-1.14738	200062_s_at	ribosomal protein L30
TRIM44	0.0006919	0.0170866	100.315	57.9983	62.1234	-1.61476	71.8326	96.099	87.4277	-1.1474	217760_at	tripartite motif-containing 44
SPN	0.000499	0.0137362	228.804	122.385	105.319	-2.17249	138.458	148.477	199.387	-1.14753	1568964_x_at	sialophorin
SLC25A12	0.0009381	0.0213267	17.2591	12.8979	10.5054	-1.64288	14.0075	13.7999	15.0069	-1.15008	203339_at	solute carrier family 25 (mitochondrial carrier, Aralar), member 12
NFYC	0.0007692	0.0184618	27.1811	30.4415	30.3238	1.11562	25.963	22.2306	23.6065	-1.15142	1559218_s_at	nuclear transcription factor Y, gamma
SNAPC3	1.55e-05	0.0009576	9.12754	6.35088	5.98556	-1.52493	6.8113	7.5215	7.92354	-1.15195	222286_at	small nuclear RNA activating complex, polypeptide 3, 50kDa
NA	0.0002171	0.0073079	10.9712	7.55489	9.07795	-1.20855	8.71748	8.86024	9.51596	-1.15292	237143_at	NA
AGAP2	0.0007739	0.0185144	6.81016	7.76378	7.01842	1.03058	7.34853	5.23604	5.90651	-1.15299	215080_s_at	ArfGAP with GTPase domain, ankyrin repeat and PH domain 2
TMEM14A	0.0006029	0.0155709	13.3248	7.9951	10.1941	-1.30711	8.74717	10.0012	11.5312	-1.15553	218477_at	transmembrane protein 14A
LOC552889	0.0005568	0.014771	163.027	101.815	106.72	-1.52761	125.16	145.948	141.066	-1.15568	212114_at	hypothetical protein LOC552889
APOL3	0.0006155	0.0157475	133.036	82.8419	71.7437	-1.85432	87.4437	103.536	115.101	-1.15582	221087_s_at	apolipoprotein L, 3
SDHALP1	0.0001562	0.0057433	230.076	194.34	172.783	-1.33159	176.259	205.735	198.368	-1.15984	222021_x_at	succinate dehydrogenase complex, subunit A, flavoprotein pseudogene 1
RPL23A	1.58e-05	0.0009728	8651.35	6090.23	6553.59	-1.32009	7039.59	7638.23	7458.13	-1.15999	208834_x_at	ribosomal protein L23a
VPS45	0.0002084	0.0071303	79.0345	44.0838	41.0103	-1.92719	52.7716	64.4411	68.0485	-1.16144	209268_at	vacuolar protein sorting 45 homolog (S. cerevisiae)
ALG8	2.57e-05	0.0014165	65.297	37.5587	36.2112	-1.80323	39.4348	53.7631	56.1259	-1.1634	203545_at	asparagine-linked glycosylation 8, alpha-1,3-glucosyltransferase homolog (S. cerevisiae)
KLRC2	0.0002252	0.0075032	23.2183	5.56218	9.7697	-2.37656	19.7261	18.0882	19.9535	-1.16362	206785_s_at	killer cell lectin-like receptor subfamily C, member 2
INADL	0.000908	0.0207719	5.01754	3.27156	4.03415	-1.24377	4.1391	4.1889	4.3106	-1.164	223681_s_at	InaD-like (Drosophila)
ZNF320	0.0005802	0.0151709	4.85005	3.66612	3.56518	-1.36039	3.94785	4.63765	4.1646	-1.16459	229614_at	zinc finger protein 320
MRCL	0.000465	0.0130647	14.4319	27.8611	22.1676	1.53602	14.5059	17.1672	12.3866	-1.16512	230022_at	mannose receptor-like
GORASP2	4.34e-05	0.0021339	107.944	51.1263	52.1677	-2.06917	65.4703	85.2727	92.6274	-1.16536	208843_s_at	golgi reassembly stacking protein 2, 55kDa
SFRS14	0.0003474	0.0104306	59.8753	41.1476	39.6287	-1.51091	44.1857	53.3049	51.3708	-1.16555	213505_s_at	splicing factor, arginine/serine-rich 14
N4BP2	0.0007669	0.0184228	37.9916	20.2413	23.6932	-1.60348	30.6555	30.9419	32.5612	-1.16677	231996_at	NEDD4 binding protein 2
ALG9	0.0008345	0.0195318	8.30608	6.10596	5.63127	-1.47499	6.85709	6.47375	7.112	-1.1679	228817_at	asparagine-linked glycosylation 9, alpha-1,2-mannosyltransferase homolog (S. cerevisiae)
NA	0.0004701	0.0131539	9.66191	6.84285	7.26445	-1.33003	7.35347	9.06744	8.2695	-1.16838	239848_at	NA
RNF125	0.0009059	0.0207499	248.547	87.8804	92.3176	-2.69231	208.144	232.375	212.626	-1.16894	207735_at	ring finger protein 125
RIC8B	0.000114	0.0045265	29.444	15.9157	17.546	-1.6781	22.6907	23.7828	25.1423	-1.1711	219446_at	resistance to inhibitors of cholinesterase 8 homolog B (C. elegans)
NA	0.0008707	0.0201532	32.6205	19.6039	18.0709	-1.80514	27.5693	26.7206	27.8518	-1.17122	238311_at	NA
NA	0.0001263	0.0048871	5.63079	6.35185	5.7924	1.0287	4.92564	5.46075	4.79111	-1.17526	243220_at	NA
RPLP2	7e-07	8.86e-05	9295.1	6958.8	7370.56	-1.26111	8302.86	8634.53	7906.12	-1.17568	200909_s_at	ribosomal protein, large, P2
RPS2	0.0002752	0.0087633	7043.14	4775.97	5318.96	-1.32416	5885.97	6198.21	5983.62	-1.17707	221798_x_at	ribosomal protein S2
LETMD1	0.0006668	0.0166244	140.78	75.919	84.8711	-1.65876	105.198	119.001	119.587	-1.17722	207170_s_at	LETM1 domain containing 1
CLUAP1	8.02e-05	0.0034636	30.4441	14.4304	18.0792	-1.68394	19.555	21.6339	25.836	-1.17836	204576_s_at	clusterin associated protein 1
CD28	0.0001101	0.004394	10.1519	4.58818	6.92194	-1.46662	7.46656	6.95667	8.61297	-1.17867	206545_at	CD28 molecule
NA	0.0005223	0.014144	16.0686	9.54656	11.6051	-1.38462	12.4394	12.1603	13.6259	-1.17926	225328_at	NA
TMX2	< 1e-07	< 1e-07	198.441	104.236	102.861	-1.92922	134.366	161.081	168.119	-1.18036	201175_at	thioredoxin-related transmembrane protein 2
FTSJ2	0.0006091	0.0156574	108.684	68.4707	69.9872	-1.55292	71.9932	97.6984	91.9947	-1.18142	218356_at	FtsJ homolog 2 (E. coli)
NA	4.6e-06	0.0003857	30.7851	15.2956	19.5139	-1.5776	24.7093	26.4049	26.0182	-1.18321	226805_at	NA
MTAP	6.4e-06	0.0004928	14.954	10.0077	8.78772	-1.70169	11.5371	13.7947	12.6352	-1.18352	231984_at	methylthioadenosine phosphorylase
TATDN2	0.0003406	0.0102829	203.245	157.274	140.585	-1.44571	153.951	175.742	171.716	-1.18361	203648_at	TatD DNase domain containing 2
BATF	6.48e-05	0.0029232	188.969	170.749	125.502	-1.50571	143.878	132.58	159.529	-1.18455	205965_at	basic leucine zipper transcription factor, ATF-like
NUP155	0.0008819	0.0203623	22.8758	11.9308	14.0918	-1.62334	16.8598	16.4896	19.298	-1.1854	206550_s_at	nucleoporin 155kDa
C21orf33	0.0001608	0.0058763	353.232	262.365	234.212	-1.50817	286.017	294.695	297.663	-1.18668	202217_at	chromosome 21 open reading frame 33
NA	0.0002614	0.0084071	40.624	16.7565	26.5129	-1.53224	29.8408	40.5243	34.1218	-1.19056	226102_at	NA
KLHDC5	0.0007146	0.0174808	39.1673	28.6439	26.1227	-1.49936	30.2236	24.6926	32.8565	-1.19207	225963_at	kelch domain containing 5
ZNF37A	0.0009014	0.0206642	85.6023	68.393	55.2744	-1.54868	73.4806	65.212	71.7356	-1.1933	228711_at	zinc finger protein 37A
LIX1L	0.0009934	0.0222144	170.444	84.9585	102.586	-1.66148	121.013	142.097	142.65	-1.19485	225793_at	Lix1 homolog (mouse)-like
ODF2	0.0008926	0.0205313	43.3386	29.3065	29.1713	-1.48566	31.6673	36.9716	36.248	-1.19561	225617_at	outer dense fiber of sperm tails 2
RORA	0.0005425	0.014491	27.6893	17.5555	19.1569	-1.4454	21.6696	23.0179	23.1514	-1.19601	236266_at	RAR-related orphan receptor A
FASTKD2	0.0003922	0.0114979	34.7008	17.4348	17.801	-1.94938	26.2614	26.2429	29.0104	-1.19615	216996_s_at	FAST kinase domains 2
DNAJA3	0.0006163	0.0157606	76.8029	49.5948	50.2791	-1.52753	56.6083	64.726	64.197	-1.19636	205963_s_at	DnaJ (Hsp40) homolog, subfamily A, member 3
RPL23A	0.0001044	0.0042064	8414.28	5241.75	6075.57	-1.38494	6657.37	7345.07	7032.99	-1.1964	213084_x_at	ribosomal protein L23a
BRP44L	0.0009612	0.0217164	5.85205	5.95669	4.77072	-1.22666	4.87914	4.51366	4.89021	-1.19669	240362_at	brain protein 44-like
CALM1	1.5e-06	0.0001618	1037.3	737.245	660.718	-1.56995	719.851	751.54	866.405	-1.19724	200655_s_at	calmodulin 1 (phosphorylase kinase, delta)
NA	0.0006601	0.016495	26.5977	16.2835	17.4859	-1.52109	19.5263	21.9797	22.2048	-1.19784	217629_at	NA
TMEM109	1.45e-05	0.0009144	119.675	69.2634	68.4988	-1.74711	86.332	102.694	99.7241	-1.20006	201361_at	transmembrane protein 109
POP4	0.0002096	0.0071535	75.4405	56.8925	52.3565	-1.4409	60.6835	60.6019	62.8337	-1.20064	227583_at	processing of precursor 4, ribonuclease P/MRP subunit (S. cerevisiae)
ABCC10	3.8e-06	0.0003277	54.6709	38.1382	29.1644	-1.87458	32.7172	40.2827	45.4814	-1.20205	213485_s_at	ATP-binding cassette, sub-family C (CFTR/MRP), member 10
RPL10P16	0.0007736	0.0185144	46.8226	37.8872	36.9445	-1.26738	39.5463	38.301	38.8815	-1.20424	217680_x_at	ribosomal protein L10 pseudogene 16
NRBP2	0.0007741	0.0185144	28.0833	18.136	17.2	-1.63275	21.34	20.6464	23.3057	-1.205	225949_at	nuclear receptor binding protein 2
EZR	0.0005237	0.0141609	188.127	123.513	95.5156	-1.96959	114.789	133.474	156.002	-1.20593	208623_s_at	ezrin
EXOSC6	0.0001205	0.0047398	34.6214	17.9328	22.4084	-1.54502	20.9348	30.4712	28.693	-1.20661	1558044_s_at	exosome component 6
C22orf28	5.91e-05	0.0027131	218.905	153.875	129.418	-1.69146	157.801	163.717	181.272	-1.2076	200042_at	chromosome 22 open reading frame 28
TDRD3	0.0008942	0.0205595	5.96169	3.8381	4.5287	-1.31642	5.02225	5.0785	4.9357	-1.20787	214028_x_at	tudor domain containing 3
NA	0.0004553	0.012878	96.9323	157.809	87.387	-1.10923	81.3501	74.6419	80.1946	-1.20871	239060_at	NA
AKT3	0.0006065	0.0156148	19.0719	9.03407	13.6212	-1.40016	13.7189	18.1384	15.7733	-1.20912	212607_at	v-akt murine thymoma viral oncogene homolog 3 (protein kinase B, gamma)
NA	0.0005124	0.0139798	50.9506	23.0102	26.8413	-1.89822	33.9623	47.4022	42.1153	-1.20979	226848_at	NA
NA	0.0006049	0.0156078	5.63127	3.55074	3.50527	-1.60651	4.3067	4.2859	4.65102	-1.21076	215578_at	NA
RPL37A	1.21e-05	0.000798	7694.3	5975.58	5409.92	-1.42226	6370.74	7131.68	6353.21	-1.21109	201429_s_at	ribosomal protein L37a
TSGA14	3.06e-05	0.0016243	7.19364	4.45809	4.92767	-1.45984	5.7721	5.94869	5.93508	-1.21205	225485_at	testis specific, 14
CHMP4A	0.0005517	0.0146713	446.061	358.267	280.11	-1.59245	335.859	333.216	367.859	-1.21259	218571_s_at	chromatin modifying protein 4A
LOC100130872	0.0003557	0.0106622	82.1065	30.6594	37.8518	-2.16915	55.4086	70.7108	67.6992	-1.21281	1569496_s_at	hypothetical LOC100130872
RPS13	0.0008836	0.0203843	3241.05	1989.33	2339.89	-1.38513	2677.86	3038.7	2668.15	-1.21472	200018_at	ribosomal protein S13
RPL23A	1.73e-05	0.0010475	7441.77	4608.71	5253.33	-1.41658	5845.65	6437.99	6125.45	-1.21489	203012_x_at	ribosomal protein L23a
DCTPP1	2.36e-05	0.0013289	179.207	120.684	104.195	-1.71993	140.296	146.455	147.392	-1.21586	218069_at	dCTP pyrophosphatase 1
LOC100133233	1.54e-05	0.0009525	674.017	370.342	333.163	-2.02308	448.4	532.378	553.864	-1.21694	213888_s_at	hypothetical protein LOC100133233
TARBP1	0.0004126	0.0119486	71.0262	37.9926	43.2004	-1.64411	57.5734	65.6269	58.3636	-1.21696	202813_at	TAR (HIV-1) RNA binding protein 1
PHF19	8.34e-05	0.0035569	62.7357	49.0942	39.107	-1.60421	41.2843	46.1979	51.5393	-1.21724	227211_at	PHD finger protein 19
PCNT	0.000375	0.0110888	92.6783	52.0537	59.3141	-1.5625	63.3015	81.5968	76.1029	-1.2178	203660_s_at	pericentrin
TKT	3.7e-06	0.0003226	27.3523	48.4349	36.83	1.3465	27.3212	24.0431	22.4456	-1.21861	228205_at	transketolase
AKAP1	0.0005506	0.0146563	46.3634	25.5947	27.7749	-1.66925	33.8002	36.1402	38.046	-1.21861	201675_at	A kinase (PRKA) anchor protein 1
PPAP2A	0.0008724	0.020177	16.9339	12.415	12.6046	-1.34347	12.7006	14.5552	13.8887	-1.21926	210946_at	phosphatidic acid phosphatase type 2A
MGC5566	0.0006915	0.0170844	25.1769	15.9735	17.672	-1.42468	21.457	20.7674	20.649	-1.21928	220449_at	hypothetical protein MGC5566
PHC1	2.69e-05	0.0014664	40.8007	22.4217	21.1005	-1.93364	25.7325	31.4656	33.4627	-1.21929	218338_at	polyhomeotic homolog 1 (Drosophila)
SLAMF1	0.0004971	0.013706	28.0118	10.7946	16.2566	-1.7231	18.012	21.3061	22.9738	-1.21929	206181_at	signaling lymphocytic activation molecule family member 1
NA	0.0007249	0.0176937	11.873	6.02403	6.75628	-1.75733	8.35654	9.54343	9.73415	-1.21973	242134_at	NA
SF1	0.0004176	0.0120678	546.662	393.263	419.559	-1.30295	423.649	437.54	447.666	-1.22114	208313_s_at	splicing factor 1
PEX11B	3.58e-05	0.0018501	160.274	97.4384	97.9203	-1.63678	122.346	135.94	131.19	-1.22169	202658_at	peroxisomal biogenesis factor 11 beta
RBL1	0.0006281	0.0159727	5.33425	3.68987	3.61619	-1.4751	4.15262	3.69562	4.3648	-1.22211	205296_at	retinoblastoma-like 1 (p107)
PMS2L1	2.1e-05	0.0012112	112.436	82.5722	72.6324	-1.54802	77.895	93.63	91.9625	-1.22263	217485_x_at	postmeiotic segregation increased 2-like 1 pseudogene
PSMG4	0.0005327	0.0143246	21.8274	19.4738	14.9458	-1.46044	19.627	15.7143	17.8249	-1.22455	233443_at	proteasome (prosome, macropain) assembly chaperone 4
C11orf67	0.0005997	0.015547	38.9009	52.0815	32.8935	-1.18263	35.2586	32.2402	31.7592	-1.22487	221599_at	chromosome 11 open reading frame 67
RPL12	4.82e-05	0.0023016	4478.94	2665.07	3535.02	-1.26702	3922.33	3973.6	3653.21	-1.22603	200088_x_at	ribosomal protein L12
RPL23A	2.18e-05	0.0012442	8730.42	5666.56	6158.57	-1.4176	6875.18	7409.61	7114.71	-1.22709	208825_x_at	ribosomal protein L23a
KIF5C	0.0005093	0.013923	21.6325	12.5583	14.4114	-1.50108	16.532	17.8614	17.6266	-1.22727	203130_s_at	kinesin family member 5C
THSD1	8.74e-05	0.0036814	11.4058	6.71688	6.54905	-1.7416	7.76103	8.57284	9.29212	-1.22747	219477_s_at	thrombospondin, type I, domain containing 1
UBE2G2	1.33e-05	0.0008525	99.8916	58.8502	57.9654	-1.7233	67.0766	75.7434	81.286	-1.22889	1557053_s_at	ubiquitin-conjugating enzyme E2G 2 (UBC7 homolog, yeast)
MUM1	0.0006691	0.0166665	54.5762	40.6284	34.8833	-1.56454	39.97	41.2728	44.3865	-1.22957	221290_s_at	melanoma associated antigen (mutated) 1
CLEC10A	0.0001378	0.0052285	59.4742	27.6732	35.7413	-1.66402	30.9623	38.3191	48.3699	-1.22957	206682_at	C-type lectin domain family 10, member A
JMJD2C	0.0005376	0.0144014	76.1692	56.8253	52.7088	-1.44509	60.8214	63.1122	61.9253	-1.23002	214861_at	jumonji domain containing 2C
FAM179A	7.5e-06	0.0005579	32.1887	18.3506	18.1345	-1.77499	20.0849	23.6756	26.1564	-1.23063	236717_at	family with sequence similarity 179, member A
NA	9.4e-06	0.0006606	25.4862	49.6252	28.9389	1.13547	27.1566	19.1962	20.7016	-1.23113	1564525_at	NA
WHSC2	3.26e-05	0.0017073	72.9642	54.0089	49.9933	-1.45948	54.8652	61.2243	59.1886	-1.23274	34225_at	Wolf-Hirschhorn syndrome candidate 2
POLH	6e-07	7.94e-05	17.8563	12.4237	10.6889	-1.67055	13.7777	13.1612	14.4772	-1.23341	233852_at	polymerase (DNA directed), eta
KDSR	1.9e-06	0.0001953	87.3977	40.5303	42.4817	-2.0573	61.5072	62.7411	70.8564	-1.23345	202419_at	3-ketodihydrosphingosine reductase
B4GALT7	0.0003653	0.0108755	72.3363	58.3027	48.8712	-1.48014	61.7467	57.4466	58.5394	-1.23569	53076_at	xylosylprotein beta 1,4-galactosyltransferase, polypeptide 7 (galactosyltransferase I)
CENPL	0.0001542	0.0056812	51.7363	24.3792	27.3001	-1.89509	33.9408	43.4781	41.8558	-1.23606	228238_at	centromere protein L
PPP2R2B	1e-06	0.0001186	8.64516	4.58962	6.07754	-1.42248	6.12557	6.65114	6.99348	-1.23617	213849_s_at	protein phosphatase 2 (formerly 2A), regulatory subunit B, beta isoform
NA	1.62e-05	0.000993	12.5134	7.81994	8.56874	-1.46035	9.67077	10.0473	10.1165	-1.23693	233444_at	NA
MAGEH1	0.0001403	0.0052903	23.3309	8.93467	12.9313	-1.80422	18.444	18.9856	18.8512	-1.23763	218573_at	melanoma antigen family H, 1
ZBTB40	8.99e-05	0.0037407	76.2974	45.3483	51.2602	-1.48843	51.3785	61.1379	61.6448	-1.23769	203959_s_at	zinc finger and BTB domain containing 40
NA	0.0001828	0.0064523	25.82	14.3741	13.089	-1.97265	19.3515	22.3746	20.8603	-1.23776	208154_at	NA
XCL2	4.19e-05	0.0020788	104.026	21.1925	40.2986	-2.58138	86.2693	89.5748	83.9921	-1.23852	214567_s_at	chemokine (C motif) ligand 2
NUP205	0.0002157	0.0072799	21.1804	9.19096	12.4813	-1.69698	13.8928	18.235	17.0967	-1.23886	212247_at	nucleoporin 205kDa
NA	0.0006172	0.0157763	49.6056	34.0552	39.8001	-1.24637	32.9847	41.0248	40.038	-1.23896	231317_at	NA
SAMD3	2e-07	3.18e-05	73.1479	12.2885	29.8819	-2.4479	40.8127	53.144	58.9794	-1.24023	236782_at	sterile alpha motif domain containing 3
ZBTB9	0.00029	0.0091293	43.2778	28.1119	31.5934	-1.36984	30.2855	35.7681	34.8892	-1.24044	226163_at	zinc finger and BTB domain containing 9
FKBP11	0.0004057	0.01178	57.1484	37.7868	37.3847	-1.52866	36.6609	42.7104	46.0635	-1.24064	228308_at	FK506 binding protein 11, 19 kDa
RPL28	2.2e-06	0.0002156	7789.06	6076.07	5609.23	-1.38862	6286.4	6595.48	6271.54	-1.24197	200003_s_at	ribosomal protein L28
GGA1	0.0006483	0.0163069	756.672	659.403	529.557	-1.42888	557.539	567.925	608.218	-1.24408	50277_at	golgi associated, gamma adaptin ear containing, ARF binding protein 1
CARKD	0.0002228	0.007446	146.556	82.3476	81.3793	-1.8009	95.884	121.566	117.732	-1.24482	217940_s_at	carbohydrate kinase domain containing
ELAC2	9.28e-05	0.0038409	84.3862	54.665	53.6272	-1.57357	62.5962	61.1805	67.7531	-1.2455	201767_s_at	elaC homolog 2 (E. coli)
ADAM23	0.00056	0.0148128	5.19464	4.41623	4.37895	-1.18627	4.32961	4.55324	4.16943	-1.24589	244463_at	ADAM metallopeptidase domain 23
ZNF212	0.0003193	0.0098243	129.143	96.4131	104.548	-1.23525	100.688	104.812	103.605	-1.2465	203985_at	zinc finger protein 212
TTC31	0.000419	0.0121019	80.1065	51.7328	51.0626	-1.56879	55.2505	56.0461	64.2484	-1.24682	218838_s_at	tetratricopeptide repeat domain 31
PMS2L1	4.19e-05	0.0020788	123.004	88.0562	80.3944	-1.53001	80.4873	95.4818	98.6516	-1.24685	214756_x_at	postmeiotic segregation increased 2-like 1 pseudogene
MTA3	0.0008127	0.0191858	14.1537	9.4528	9.69608	-1.45973	11.9625	10.4058	11.3453	-1.24753	226852_at	metastasis associated 1 family, member 3
EIF3H	0.0002603	0.0083947	1038.04	569.053	758.575	-1.36841	813.864	837.662	831.793	-1.24796	201592_at	eukaryotic translation initiation factor 3, subunit H
CDK6	0.0001651	0.005982	55.2963	32.1329	37.1596	-1.48808	40.1194	39.6934	44.2955	-1.24835	224848_at	cyclin-dependent kinase 6
PTPLAD1	0.0008258	0.0193696	82.1102	39.0911	48.2318	-1.70241	59.5763	75.1814	65.7746	-1.24836	222405_at	protein tyrosine phosphatase-like A domain containing 1
CAPS	0.0008162	0.0192234	12.7325	13.8227	12.5993	-1.01057	12.9689	10.5397	10.1976	-1.24858	231728_at	calcyphosine
ADA	< 1e-07	< 1e-07	196.794	73.1822	79.0367	-2.4899	121.607	138.566	157.486	-1.24959	204639_at	adenosine deaminase
EIF5B	0.0008085	0.0191114	46.4469	23.714	28.6874	-1.61907	33.5002	34.8069	37.1332	-1.25082	201027_s_at	eukaryotic translation initiation factor 5B
MAP4	0.0004011	0.0116924	93.5715	71.0034	70.7007	-1.32349	69.7755	60.2672	74.7967	-1.25101	212567_s_at	microtubule-associated protein 4
CACNB3	0.0002451	0.007991	8.82939	7.89051	6.54001	-1.35006	6.69359	7.28288	7.05745	-1.25107	34726_at	calcium channel, voltage-dependent, beta 3 subunit
PARP1	0.0002472	0.008045	77.074	40.1328	45.3176	-1.70075	49.0714	63.0872	61.5872	-1.25146	208644_at	poly (ADP-ribose) polymerase 1
RPL12	2.57e-05	0.0014165	4393.75	2374.15	3409.84	-1.28855	3865.84	3818.99	3510.49	-1.25161	200809_x_at	ribosomal protein L12
MCCC2	8.87e-05	0.0037062	67.2317	29.5498	38.4204	-1.7499	42.447	53.0028	53.6873	-1.25228	209623_at	methylcrotonoyl-Coenzyme A carboxylase 2 (beta)
AKT3	0.0004678	0.0131164	56.8961	37.7112	32.8268	-1.73322	41.6036	45.6682	45.4171	-1.25275	212609_s_at	v-akt murine thymoma viral oncogene homolog 3 (protein kinase B, gamma)
NEFL	0.0002082	0.0071303	11.9928	6.65227	7.59442	-1.57916	8.65651	8.15883	9.57234	-1.25286	221916_at	neurofilament, light polypeptide
KTELC1	0.0003934	0.0115207	137.256	79.2308	80.2322	-1.71073	101.742	109.194	109.451	-1.25404	218587_s_at	KTEL (Lys-Tyr-Glu-Leu) containing 1
EDC4	0.0008986	0.0206173	64.0687	54.0604	42.4781	-1.50828	48.6582	47.5881	51.058	-1.25482	202496_at	enhancer of mRNA decapping 4
ZFP82	1.97e-05	0.0011619	14.2016	7.32996	8.87592	-1.60002	10.6381	11.5849	11.3103	-1.25563	1555793_a_at	zinc finger protein 82 homolog (mouse)
NA	0.000506	0.0138563	13.943	6.68551	8.69359	-1.60383	9.54171	14.3833	11.0918	-1.25705	242051_at	NA
KIF19	0.0003315	0.0100637	6.54105	5.77165	5.27551	-1.23989	5.13379	5.34235	5.20214	-1.25738	1553314_a_at	kinesin family member 19
PPIA	0.0005737	0.0150514	3491.78	2289.17	2371.82	-1.47219	2753.47	2755.16	2776.35	-1.25768	211978_x_at	peptidylprolyl isomerase A (cyclophilin A)
MPRIP	1.35e-05	0.0008613	118.478	72.4316	68.7149	-1.72419	87.4174	100.286	94.1074	-1.25896	212197_x_at	myosin phosphatase Rho interacting protein
ITFG2	0.000652	0.0163598	31.6906	23.1577	24.5184	-1.29252	24.0793	21.1357	25.1717	-1.25898	220589_s_at	integrin alpha FG-GAP repeat containing 2
EHBP1	0.0001309	0.0050472	9.0667	6.14001	6.47375	-1.40053	9.13333	6.44766	7.19738	-1.25972	212650_at	EH domain binding protein 1
NA	2.48e-05	0.0013794	13.135	9.07176	7.57266	-1.73453	10.2283	8.61079	10.4212	-1.26041	1568997_at	NA
ANKRD23	0.0002216	0.0074195	17.15	11.3138	11.0277	-1.55517	12.1665	12.4182	13.6041	-1.26065	230384_at	ankyrin repeat domain 23
SLC25A36	0.0003109	0.0096036	221.962	101.057	130.345	-1.70288	186.222	176.071	175.99	-1.26122	201917_s_at	solute carrier family 25, member 36
NA	1.77e-05	0.0010658	135.897	43.917	60.7679	-2.23633	84.4368	101.395	107.739	-1.26135	239231_at	NA
KIAA0841	7.52e-05	0.0032788	69.8869	56.7418	48.0789	-1.45359	52.8432	61.1516	55.3742	-1.26208	36888_at	KIAA0841
GATA3	5.23e-05	0.0024503	6.27824	3.52299	4.07893	-1.53919	4.0406	4.48595	4.97149	-1.26285	209602_s_at	GATA binding protein 3
BCL9L	5.84e-05	0.0026877	72.6847	38.4598	40.1403	-1.81077	47.6125	43.5356	57.5558	-1.26286	228065_at	B-cell CLL/lymphoma 9-like
ZNF416	0.0007488	0.0181314	22.0521	13.6126	12.6101	-1.74876	15.1067	17.3388	17.4489	-1.26381	223589_at	zinc finger protein 416
C17orf101	0.0007426	0.0179972	48.9483	38.458	34.4817	-1.41954	39.5467	39.4754	38.6783	-1.26552	64438_at	chromosome 17 open reading frame 101
CYFIP2	0.000199	0.0068863	117.515	43.9041	59.5976	-1.9718	77.3664	91.5791	92.8477	-1.26567	220999_s_at	cytoplasmic FMR1 interacting protein 2
ULK4	0.0003252	0.0099442	11.246	11.4292	9.5488	-1.17774	8.35349	8.78552	8.88473	-1.26576	232206_at	unc-51-like kinase 4 (C. elegans)
NA	0.0006523	0.0163599	10.8105	6.26406	6.0784	-1.77852	8.13739	8.59742	8.53894	-1.26603	236092_at	NA
38604	0.0005817	0.0152029	893.907	482.088	532.096	-1.67997	582.344	687.69	706.071	-1.26603	41220_at	septin 9
SEC31B	0.000262	0.0084115	93.4928	60.3708	52.9238	-1.76655	55.5344	68.2875	73.8131	-1.26662	209889_at	SEC31 homolog B (S. cerevisiae)
PMS2L1	4.69e-05	0.0022513	124.667	78.3939	80.7217	-1.5444	81.5306	92.6688	98.3484	-1.2676	214526_x_at	postmeiotic segregation increased 2-like 1 pseudogene
XCL1	1.4e-06	0.0001525	199.756	36.0346	76.0542	-2.6265	168.347	180.569	157.57	-1.26773	206366_x_at	chemokine (C motif) ligand 1
NA	0.0003341	0.010137	22.7126	6.48314	9.72698	-2.33501	14.4233	17.111	17.9108	-1.26809	235919_at	NA
CCDC64	1.33e-05	0.0008525	48.3159	25.2009	24.1011	-2.00471	31.2816	27.1486	38.0959	-1.26827	228320_x_at	coiled-coil domain containing 64
SIGLECP3	2.99e-05	0.0015949	29.6595	12.0737	16.1037	-1.84179	22.3908	21.6681	23.3845	-1.26834	232686_at	sialic acid binding Ig-like lectin, pseudogene 3
TSHZ1	0.0007735	0.0185144	22.5998	8.7118	11.6882	-1.93355	12.6667	18.3186	17.8163	-1.26849	223282_at	teashirt zinc finger homeobox 1
GIMAP1	0.000742	0.0179972	250.493	116.285	141.251	-1.77339	168.854	188.483	197.471	-1.26851	1552318_at	GTPase, IMAP family member 1
TRIM46	0.0007149	0.0174808	38.0432	25.9756	26.084	-1.45849	29.8039	29.1799	29.9807	-1.26893	238147_at	tripartite motif-containing 46
RRP1B	2.82e-05	0.0015205	104.126	40.2718	41.2472	-2.52443	59.6202	69.7714	82.045	-1.26913	212846_at	ribosomal RNA processing 1 homolog B (S. cerevisiae)
POLR3A	3.44e-05	0.0017913	93.9666	66.5913	57.0407	-1.64736	65.3015	70.773	73.9992	-1.26983	231763_at	polymerase (RNA) III (DNA directed) polypeptide A, 155kDa
NA	1.83e-05	0.0010947	10.3922	4.83821	6.33546	-1.64032	7.68209	9.10589	8.18219	-1.2701	239744_at	NA
TAF3	0.0003343	0.0101375	25.1016	12.1593	11.0246	-2.27686	17.2034	17.7843	19.7513	-1.27088	235119_at	TAF3 RNA polymerase II, TATA box binding protein (TBP)-associated factor, 140kDa
PPIA	0.0001415	0.0053245	3917.39	2632.18	2637.62	-1.4852	3112.14	3181.46	3079.9	-1.27192	212661_x_at	peptidylprolyl isomerase A (cyclophilin A)
PPIA	0.0003106	0.0095998	3541.19	2296.54	2380.36	-1.48767	2675.55	2814.57	2783.23	-1.27233	201293_x_at	peptidylprolyl isomerase A (cyclophilin A)
EIF2B3	0.0007031	0.0172773	73.6708	47.8745	52.7229	-1.39732	56.7835	55.0691	57.858	-1.2733	218488_at	eukaryotic translation initiation factor 2B, subunit 3 gamma, 58kDa
SLC7A6OS	0.0004527	0.0128312	82.8443	57.129	52.5879	-1.57535	59.5844	58.0771	65.0574	-1.2734	229153_at	solute carrier family 7, member 6 opposite strand
STX8	0.0008976	0.0206116	214.654	151.507	131.042	-1.63806	162.611	137.04	168.521	-1.27375	204690_at	syntaxin 8
NA	0.0007204	0.0175996	4.38137	3.66298	3.13091	-1.39939	3.42793	3.36239	3.43776	-1.27449	243275_at	NA
CEBPZ	0.0003221	0.009866	123.233	73.5926	75.6138	-1.62977	93.2938	105.733	96.6605	-1.27491	229746_x_at	CCAAT/enhancer binding protein (C/EBP), zeta
NA	8e-07	9.9e-05	26.5094	14.405	17.7933	-1.48985	22.7636	22.7195	20.7887	-1.27518	228917_at	NA
AFG3L2	0.0003473	0.0104306	70.025	49.2596	52.5732	-1.33195	57.8758	58.1506	54.8935	-1.27565	202486_at	AFG3 ATPase family gene 3-like 2 (yeast)
TRIM35	8.76e-05	0.0036814	37.2358	22.122	24.1344	-1.54285	28.6401	32.8094	29.169	-1.27656	227102_at	tripartite motif-containing 35
RQCD1	0.0004839	0.0134369	107.46	62.8843	68.3284	-1.57271	85.1045	93.6993	84.1385	-1.27719	213179_at	RCD1 required for cell differentiation1 homolog (S. pombe)
NA	0.0006094	0.0156574	5.34705	4.09934	3.63903	-1.46936	4.20067	4.63661	4.18412	-1.27794	1569201_a_at	NA
BTBD9	0.0004966	0.0136991	44.4223	38.9893	34.6449	-1.28222	27.4817	35.734	34.7375	-1.2788	229867_at	BTB (POZ) domain containing 9
SCARNA2	0.0009823	0.0220836	16.8636	23.4781	15.3015	-1.10209	14.7698	15.4741	13.1839	-1.2791	237137_at	small Cajal body-specific RNA 2
PPIA	0.0002552	0.0082514	3536.21	2313.85	2366.87	-1.49405	2672.63	2774.72	2763.07	-1.27981	211765_x_at	peptidylprolyl isomerase A (cyclophilin A)
INTS10	0.0006115	0.0156966	24.7361	17.113	17.8647	-1.38464	20.5851	19.3896	19.312	-1.28087	237504_at	integrator complex subunit 10
NA	0.0001315	0.0050561	46.6152	26.5898	26.519	-1.75781	32.3615	34.9566	36.391	-1.28095	222280_at	NA
LOC100131096	0.000698	0.0171906	344.914	256.131	207.306	-1.66379	238.17	222.554	269	-1.28221	242364_x_at	hypothetical LOC100131096
NA	9.99e-05	0.0040711	22.2008	14.1514	16.3437	-1.35837	17.0691	18.946	17.3071	-1.28275	213658_at	NA
C6orf66	0.0007977	0.0189052	26.093	13.9845	18.2367	-1.43079	20.9282	23.5801	20.3411	-1.28277	219006_at	chromosome 6 open reading frame 66
SAE1	5e-07	6.78e-05	118.511	64.1921	67.2308	-1.76275	73.8727	88.913	92.3645	-1.28308	217946_s_at	SUMO1 activating enzyme subunit 1
RPL32	5.6e-06	0.0004457	5944.86	3501.29	4437.68	-1.33963	4902.97	4898.01	4631.1	-1.28368	200674_s_at	ribosomal protein L32
ANGEL1	0.0007643	0.0183765	41.4432	25.715	28.9543	-1.43133	30.4139	30.6517	32.276	-1.28402	213099_at	angel homolog 1 (Drosophila)
MID1	0.0004265	0.0122538	34.4558	21.0878	20.1175	-1.71272	23.1996	27.9703	26.8161	-1.28489	210694_s_at	midline 1 (Opitz/BBB syndrome)
CIAPIN1	1.8e-06	0.0001867	135.242	79.3685	80.3185	-1.68383	94.6683	114.286	105.176	-1.28586	208968_s_at	cytokine induced apoptosis inhibitor 1
TUBB	6.78e-05	0.0030261	716.721	435.097	412.707	-1.73663	529.74	586.626	557.243	-1.28619	212320_at	tubulin, beta
NA	4.16e-05	0.0020715	7.65334	12.3175	8.27598	1.08136	7.53793	6.30283	5.95004	-1.28627	230711_at	NA
PDGFD	6.97e-05	0.0030932	22.9484	9.6813	12.1249	-1.89266	16.8559	17.7475	17.836	-1.28664	219304_s_at	platelet derived growth factor D
PSMC2	1.83e-05	0.0010947	72.8418	34.0391	41.6749	-1.74786	55.0206	55.9202	56.5901	-1.28718	201067_at	proteasome (prosome, macropain) 26S subunit, ATPase, 2
NA	1.14e-05	0.000761	36.9804	23.0646	23.0559	-1.60395	25.6536	28.6402	28.7247	-1.28741	213657_s_at	NA
C12orf47	0.0003387	0.0102482	23.2879	11.3739	14.8631	-1.56683	16.9034	15.6064	18.0867	-1.28757	64432_at	chromosome 12 open reading frame 47
TTC19	0.0003003	0.0093533	121.01	49.9545	55.5411	-2.17875	78.4181	97.4038	93.9433	-1.28812	217964_at	tetratricopeptide repeat domain 19
ZBTB24	0.0006214	0.0158614	47.8084	28.6875	29.5411	-1.61837	37.0109	41.5251	37.1102	-1.28828	205340_at	zinc finger and BTB domain containing 24
ZNF133	0.0002563	0.0082804	54.6571	42.4859	35.4421	-1.54215	41.5528	46.0859	42.414	-1.28866	37254_at	zinc finger protein 133
ZNF263	0.0003682	0.010935	92.7317	60.9743	58.8655	-1.57531	67.0008	71.1454	71.9259	-1.28927	203707_at	zinc finger protein 263
EPRS	8.78e-05	0.0036842	126.749	69.9897	73.5827	-1.72254	91.0404	93.8661	98.2809	-1.28966	200843_s_at	glutamyl-prolyl-tRNA synthetase
TRIM44	1.3e-06	0.0001439	266.675	158.947	127.835	-2.08609	167.838	215.876	206.719	-1.29004	217759_at	tripartite motif-containing 44
IDH2	0.0005492	0.0146262	73.3489	44.3184	46.1835	-1.58821	54.5296	52.9419	56.8378	-1.29049	210045_at	isocitrate dehydrogenase 2 (NADP+), mitochondrial
NEO1	0.0006041	0.0155945	29.6829	28.615	20.0445	-1.48085	22.9687	19.4559	22.9656	-1.2925	225270_at	neogenin homolog 1 (chicken)
MCPH1	1e-07	1.75e-05	42.9137	20.9378	22.3159	-1.92301	30.1875	32.8061	33.178	-1.29344	1557347_at	microcephalin 1
GOLGA8A	0.000935	0.0212827	47.3583	9.93802	19.7692	-2.39556	27.2596	35.9044	36.591	-1.29426	208798_x_at	golgi autoantigen, golgin subfamily a, 8A
FXN	0.0006682	0.0166517	31.3593	17.1123	18.2615	-1.71723	21.944	24.0787	24.227	-1.2944	205565_s_at	frataxin
RPL10A	0.0006066	0.0156148	5078.95	3091.79	3054.19	-1.66295	3885.7	3808.67	3923.09	-1.29463	229563_s_at	ribosomal protein L10a
FYCO1	1.7e-06	0.0001798	65.7552	30.5461	27.8624	-2.36	39.8265	47.854	50.7877	-1.29471	218204_s_at	FYVE and coiled-coil domain containing 1
CD40LG	2.3e-06	0.0002238	55.1707	28.8824	37.1503	-1.48507	38.6106	43.6269	42.6097	-1.29479	207892_at	CD40 ligand
LARS	1.51e-05	0.0009392	97.6439	53.1493	48.3651	-2.01889	63.116	75.3129	75.3732	-1.29547	222428_s_at	leucyl-tRNA synthetase
DDB2	0.0001855	0.0065265	114.098	64.8294	60.9447	-1.87216	78.3683	80.6211	88.0164	-1.29633	203409_at	damage-specific DNA binding protein 2, 48kDa
ZMIZ2	0.0009447	0.0214321	245.239	190.75	155.924	-1.57281	158.025	173.157	189.101	-1.29687	54970_at	zinc finger, MIZ-type containing 2
ARPC5L	8.22e-05	0.0035167	342.975	200.919	191.571	-1.79033	227.029	259.981	264.107	-1.29862	220966_x_at	actin related protein 2/3 complex, subunit 5-like
RPS15A	0.0004263	0.0122538	59.8709	37.2877	35.5159	-1.68575	41.5056	46.7341	46.1011	-1.29869	235309_at	ribosomal protein S15a
KIR2DS5	0.0008208	0.0192937	65.8499	38.1621	44.0056	-1.4964	49.6442	50.4787	50.6792	-1.29935	208203_x_at	killer cell immunoglobulin-like receptor, two domains, short cytoplasmic tail, 5
RUNX3	0.0001224	0.004787	230.739	74.0606	107.534	-2.14573	126.792	171.843	177.531	-1.29971	204197_s_at	runt-related transcription factor 3
VPS33B	5.36e-05	0.0025005	92.3394	71.9428	55.2721	-1.67063	62.7282	74.1864	71.0408	-1.29981	44111_at	vacuolar protein sorting 33 homolog B (yeast)
NA	0.0006471	0.0162967	25.6968	13.693	12.827	-2.00333	19.9108	21.4187	19.7664	-1.30003	238970_at	NA
NIPSNAP1	1.27e-05	0.0008306	166.686	95.9794	111.471	-1.49533	120.498	136.742	128.141	-1.3008	201709_s_at	nipsnap homolog 1 (C. elegans)
DHX35	0.0007897	0.0187644	27.5721	17.7909	18.5358	-1.48751	19.3065	24.0576	21.1961	-1.30081	218579_s_at	DEAH (Asp-Glu-Ala-His) box polypeptide 35
ZNF544	1.21e-05	0.000798	98.4573	57.8713	53.4841	-1.84087	71.6954	71.8254	75.6475	-1.30153	218735_s_at	zinc finger protein 544
TCTN3	5.5e-06	0.000439	59.2119	31.8751	34.2837	-1.72711	42.4686	49.64	45.4848	-1.30179	212123_at	tectonic family member 3
DUSP2	0.0001594	0.0058335	50.2493	24.1799	31.5785	-1.59125	33.2272	37.2253	38.583	-1.30237	204794_at	dual specificity phosphatase 2
C3orf75	0.0001255	0.0048712	87.4759	59.1392	57.0452	-1.53345	64.2594	69.3004	67.1482	-1.30273	223277_at	chromosome 3 open reading frame 75
RPL7AP36	0.0007932	0.018822	512.049	311.308	338.832	-1.51122	392.817	455.433	393.053	-1.30275	234512_x_at	ribosomal protein L7a pseudogene 36
NA	0.0001923	0.006696	41.2042	24.1286	22.3353	-1.8448	29.0122	30.717	31.6182	-1.30318	225896_at	NA
NA	0.0008595	0.0199847	35.9669	23.3004	22.6501	-1.58793	24.5397	26.7635	27.5765	-1.30426	228207_at	NA
IVD	0.0007678	0.0184363	104.992	74.5293	67.2855	-1.5604	79.1199	86.5075	80.4929	-1.30437	225311_at	isovaleryl Coenzyme A dehydrogenase
PDCD2L	0.0002005	0.0069207	15.6827	9.50485	9.53237	-1.64521	12.7761	11.2886	12.018	-1.30494	224467_s_at	programmed cell death 2-like
SSBP4	0.0001484	0.0055233	107.406	61.7795	55.0505	-1.95105	69.519	72.5192	82.2983	-1.30508	223226_x_at	single stranded DNA binding protein 4
ALG9	0.0007056	0.0173309	30.1115	17.2677	15.948	-1.88811	20.1685	24.2198	23.0581	-1.3059	219374_s_at	asparagine-linked glycosylation 9, alpha-1,2-mannosyltransferase homolog (S. cerevisiae)
ALMS1	2.05e-05	0.0011911	17.5693	12.7033	11.9823	-1.46627	13.2398	16.3191	13.4369	-1.30754	214221_at	Alstrom syndrome 1
TMEM97	0.0001519	0.0056154	24.4132	13.7457	13.5657	-1.79963	17.5974	16.8969	18.6689	-1.30769	212282_at	transmembrane protein 97
BAZ1B	1.01e-05	0.0007008	117.585	73.5288	71.6071	-1.64209	78.1886	95.4929	89.888	-1.30813	208445_s_at	bromodomain adjacent to zinc finger domain, 1B
RPS16	9e-07	0.0001096	7323.49	4897.32	4640.36	-1.57821	5550.17	5768.8	5597.54	-1.30834	226131_s_at	ribosomal protein S16
ARL1	6.24e-05	0.0028313	43.9262	25.8013	24.7048	-1.77804	29.0431	30.1293	33.5732	-1.30837	201658_at	ADP-ribosylation factor-like 1
MDC1	0.0001425	0.0053511	49.5126	20.617	23.1434	-2.13938	29.7319	35.0959	37.8382	-1.30854	203062_s_at	mediator of DNA damage checkpoint 1
GEMIN4	8.14e-05	0.0034934	61.8398	39.435	33.9695	-1.82045	42.599	37.7278	47.2498	-1.30878	205527_s_at	gem (nuclear organelle) associated protein 4
ZNF565	0.0005165	0.0140356	18.4862	11.2159	12.1534	-1.52108	14.3329	12.672	14.1232	-1.30893	228305_at	zinc finger protein 565
NA	0.0006059	0.0156115	11.2789	8.113	6.83132	-1.65106	7.92234	7.15637	8.60817	-1.31026	242666_at	NA
BNIP3	0.0007131	0.0174603	16.5651	9.21358	10.6414	-1.55667	14.1748	10.5753	12.6261	-1.31198	201848_s_at	BCL2/adenovirus E1B 19kDa interacting protein 3
NA	0.0002624	0.0084145	39.2324	41.2234	26.311	-1.4911	25.5718	25.9842	29.8892	-1.31259	236062_at	NA
TOMM70A	8.04e-05	0.0034656	104.09	40.8873	47.8008	-2.17758	68.7678	71.5562	79.1978	-1.31431	201519_at	translocase of outer mitochondrial membrane 70 homolog A (S. cerevisiae)
MRPL17	0.0001511	0.0055971	48.5266	27.5146	36.0286	-1.34689	38.2184	31.8478	36.9155	-1.31453	222216_s_at	mitochondrial ribosomal protein L17
TMEM97	0.0001857	0.0065294	11.385	7.19864	5.87983	-1.93628	8.3238	8.21845	8.66011	-1.31465	212281_s_at	transmembrane protein 97
ATPAF1	2.89e-05	0.0015506	32.9803	20.7825	19.2446	-1.71374	22.7747	27.1934	25.0851	-1.31473	224728_at	ATP synthase mitochondrial F1 complex assembly factor 1
TRD@	0.0006803	0.0168916	49.2207	7.14159	19.2169	-2.56132	28.7009	37.0659	37.4037	-1.31593	216191_s_at	T cell receptor delta locus
RPL7AP66	0.0008074	0.0190937	2303.59	1245.21	1481.53	-1.55487	1714.83	1788.58	1749.92	-1.3164	234873_x_at	ribosomal protein L7a pseudogene 66
DPH5	0.0001694	0.0061014	153.629	112.802	92.1525	-1.66712	116.167	121.825	116.649	-1.31702	219590_x_at	DPH5 homolog (S. cerevisiae)
PPIA	0.0002427	0.0079269	3491.82	2171.72	2368.05	-1.47455	2623.4	2703.18	2650.09	-1.31762	211378_x_at	peptidylprolyl isomerase A (cyclophilin A)
RNMTL1	2.11e-05	0.0012156	85.4487	55.7247	48.6464	-1.75653	60.2924	64.9619	64.8422	-1.31779	218993_at	RNA methyltransferase like 1
C20orf4	0.0001073	0.0043074	93.8417	60.3708	57.2262	-1.63984	64.5103	72.9973	71.211	-1.3178	218089_at	chromosome 20 open reading frame 4
C7orf40	0.0003691	0.0109498	78.1521	45.4576	44.5683	-1.75354	54.8805	68.4969	59.2821	-1.31831	225699_at	chromosome 7 open reading frame 40
PARP6	0.000267	0.008542	183.103	128.654	125.442	-1.45966	121.254	135.911	138.879	-1.31844	219639_x_at	poly (ADP-ribose) polymerase family, member 6
LOC100128071	0.0002226	0.0074438	18.6642	18.8202	14.5555	-1.28228	14.8052	14.686	14.148	-1.31921	236874_at	similar to hCG41624
SNRNP200	0.0005651	0.0149044	342.469	221.237	218.615	-1.56654	237.93	291.286	259.517	-1.31964	200058_s_at	small nuclear ribonucleoprotein 200kDa (U5)
UBIAD1	8.34e-05	0.0035569	78.1788	53.7557	53.6144	-1.45817	58.7385	58.9655	59.2163	-1.32022	229348_at	UbiA prenyltransferase domain containing 1
SLC11A2	0.0005898	0.0153778	12.3516	10.3976	8.40783	-1.46905	9.53809	9.19962	9.34973	-1.32106	237106_at	solute carrier family 11 (proton-coupled divalent metal ion transporters), member 2
SRPRB	0.0002406	0.0078866	78.7507	37.5867	39.4321	-1.99712	47.9338	63.961	59.5499	-1.32243	218140_x_at	signal recognition particle receptor, B subunit
PHF10	0.0006812	0.0169063	106.668	55.1378	62.0317	-1.71957	63.7223	82.7991	80.5864	-1.32365	219126_at	PHD finger protein 10
TBC1D4	2.2e-06	0.0002156	79.0366	19.4727	31.2104	-2.53238	49.4617	54.7738	59.706	-1.32376	203386_at	TBC1 domain family, member 4
TMEM161A	4e-07	5.79e-05	160.157	109.417	100.241	-1.59773	100.362	116.02	120.984	-1.32379	43977_at	transmembrane protein 161A
DNMT3A	0.0008001	0.0189456	23.8576	14.1314	19.2704	-1.23804	14.9238	20.2944	18.0199	-1.32396	244428_at	DNA (cytosine-5-)-methyltransferase 3 alpha
NA	0.0006392	0.0161498	7.58801	4.63912	4.39703	-1.72571	5.49737	4.98458	5.73036	-1.32418	237575_at	NA
NA	1.7e-06	0.0001798	25.6442	12.7949	13.6957	-1.87242	17.5393	22.4551	19.3635	-1.32436	1566446_at	NA
MPHOSPH9	6e-07	7.94e-05	39.4704	14.3784	19.9507	-1.97839	24.669	31.3494	29.7945	-1.32475	221965_at	M-phase phosphoprotein 9
ZNF519	0.0004576	0.0129098	8.20342	5.95911	5.9364	-1.38189	5.7358	6.66746	6.19041	-1.32518	1564190_x_at	zinc finger protein 519
YPEL1	0.000296	0.0092479	74.6182	31.292	42.7386	-1.74592	49.0613	53.3201	56.2969	-1.32544	213996_at	yippee-like 1 (Drosophila)
NA	0.0001037	0.0041905	5.95429	3.71854	3.78694	-1.57232	4.31557	3.52981	4.49163	-1.32564	1564151_at	NA
NUCKS1	2.62e-05	0.0014354	67.7057	27.4034	33.2668	-2.03524	43.6812	48.7363	51.0699	-1.32575	224581_s_at	nuclear casein kinase and cyclin-dependent kinase substrate 1
NHEDC2	5.24e-05	0.0024529	12.452	6.13265	7.57635	-1.64354	8.14758	9.70366	9.39215	-1.32579	229491_at	Na+/H+ exchanger domain containing 2
TNPO3	0.000598	0.015525	358.702	396.433	271.143	-1.32293	275.685	254.543	270.478	-1.32618	212318_at	transportin 3
FBXO41	1.08e-05	0.0007326	52.8192	36.146	29.3284	-1.80096	32.8597	39.5088	39.812	-1.32671	44040_at	F-box protein 41
PMS2L1	0.0002564	0.0082804	115.805	72.2639	73.0076	-1.58621	72.612	74.5097	87.2695	-1.32699	216843_x_at	postmeiotic segregation increased 2-like 1 pseudogene
PHB2	0.0008895	0.0204945	993.129	635.065	614.063	-1.61731	759.649	760.119	748.361	-1.32707	201600_at	prohibitin 2
B3GNT1	7.14e-05	0.0031584	28.5769	19.0273	18.5887	-1.53733	19.0909	17.784	21.5313	-1.32723	203188_at	UDP-GlcNAc:betaGal beta-1,3-N-acetylglucosaminyltransferase 1
SNHG5	1.24e-05	0.0008129	8.33545	4.79607	4.52249	-1.84311	6.13598	4.60743	6.28021	-1.32726	244669_at	small nucleolar RNA host gene 5 (non-protein coding)
GRB10	< 1e-07	< 1e-07	14.2986	58.0244	20.7605	1.45192	17.1795	11.7379	10.7716	-1.32744	215248_at	growth factor receptor-bound protein 10
PPIA	0.0008434	0.0196811	7.34443	5.61636	5.33416	-1.37687	5.85769	4.92169	5.53124	-1.32781	217602_at	peptidylprolyl isomerase A (cyclophilin A)
PPP3CC	0.0001288	0.0049733	27.7034	11.7906	13.4685	-2.05689	15.9807	18.1741	20.8548	-1.3284	32541_at	protein phosphatase 3 (formerly 2B), catalytic subunit, gamma isoform
LARS	0.0005428	0.014491	112.46	51.123	61.6289	-1.82479	70.6908	83.6879	84.6387	-1.32871	222427_s_at	leucyl-tRNA synthetase
CXCR3	8.76e-05	0.0036814	90.6245	34.0459	44.0858	-2.05564	54.4755	62.9569	68.1929	-1.32894	207681_at	chemokine (C-X-C motif) receptor 3
ATF7IP2	0.0001257	0.0048712	50.6019	27.6975	32.6415	-1.55023	39.7558	35.3577	38.076	-1.32897	219870_at	activating transcription factor 7 interacting protein 2
PACS2	0.0001518	0.0056154	88.0955	67.5177	61.4167	-1.43439	62.5781	62.4365	66.2817	-1.32911	34406_at	phosphofurin acidic cluster sorting protein 2
POP5	0.000528	0.0142376	91.0468	37.2428	43.7756	-2.07985	60.0084	68.6923	68.4616	-1.3299	204839_at	processing of precursor 5, ribonuclease P/MRP subunit (S. cerevisiae)
MSH5	6.28e-05	0.0028471	15.4713	10.6274	10.4816	-1.47604	11.1083	11.8276	11.6304	-1.33024	210410_s_at	mutS homolog 5 (E. coli)
AGPAT6	6.7e-06	0.0005123	205.018	192.944	128.551	-1.59483	133.608	148.003	154.12	-1.33025	224776_at	1-acylglycerol-3-phosphate O-acyltransferase 6 (lysophosphatidic acid acyltransferase, zeta)
NA	1.6e-06	0.0001712	94.9838	35.7852	48.7353	-1.94897	61.4862	65.8072	71.3849	-1.33059	226725_at	NA
RPUSD4	0.0009006	0.0206545	85.6571	54.0192	45.5098	-1.88217	59.0623	65.336	64.3545	-1.33102	225398_at	RNA pseudouridylate synthase domain containing 4
KIAA0841	0.0002076	0.0071163	6.15266	3.85259	4.37835	-1.40525	4.30274	4.63132	4.62231	-1.33108	213054_at	KIAA0841
SLC46A3	0.0001336	0.0051117	154.54	98.8065	88.4392	-1.74741	99.8954	128.511	116.086	-1.33125	214719_at	solute carrier family 46, member 3
IPO9	4.52e-05	0.0021909	27.1332	16.7965	17.5761	-1.54376	18.1608	23.8909	20.3777	-1.33152	213785_at	importin 9
NA	3.2e-05	0.0016839	36.7169	21.8596	19.3168	-1.90078	23.6989	28.9093	27.5739	-1.33158	1558695_at	NA
PPAN	0.0004608	0.0129733	84.3815	62.6673	54.2625	-1.55506	62.5198	59.2373	63.3669	-1.33163	221649_s_at	peter pan homolog (Drosophila)
NCDN	0.0002184	0.0073348	37.4368	27.91	21.248	-1.7619	23.9165	25.3636	28.1061	-1.33198	209556_at	neurochondrin
LOC401431	0.0001046	0.0042082	11.0047	6.95997	6.88673	-1.59796	7.70812	7.86999	8.26037	-1.33223	229094_at	hypothetical LOC401431
UNG	0.0006837	0.0169453	76.2217	39.3856	49.6858	-1.53407	51.1125	55.179	57.2051	-1.33243	202330_s_at	uracil-DNA glycosylase
CHIC1	4.06e-05	0.0020328	9.33623	4.48392	5.02993	-1.85613	6.33703	7.37424	7.0067	-1.33247	228345_at	cysteine-rich hydrophobic domain 1
LOC729088	8.21e-05	0.0035151	4.30139	3.4379	3.22462	-1.33392	3.31112	3.36429	3.22499	-1.33377	238833_at	hypothetical protein LOC729088
NA	0.000521	0.0141298	10.94	8.0003	7.02215	-1.55792	8.12478	8.7834	8.20191	-1.33383	1568795_at	NA
RPL13	4.9e-06	0.0004035	8421.85	5067.51	5252.04	-1.60354	6234.35	5936.06	6313.91	-1.33386	212734_x_at	ribosomal protein L13
PRKACB	0.0006963	0.0171769	126.481	27.0856	61.4348	-2.05879	88.5873	89.571	94.8155	-1.33397	202741_at	protein kinase, cAMP-dependent, catalytic, beta
MAP4	1.1e-06	0.0001266	118.065	71.0313	55.5027	-2.12719	64.647	81.8601	88.3974	-1.33562	212566_at	microtubule-associated protein 4
NA	4.15e-05	0.0020684	11.3056	7.43536	6.59391	-1.71455	7.32358	9.04191	8.46304	-1.33588	233678_at	NA
MCCC2	1.93e-05	0.0011433	6.43742	4.44986	4.23658	-1.51948	4.50098	4.59895	4.81689	-1.33643	233231_at	methylcrotonoyl-Coenzyme A carboxylase 2 (beta)
RNASEN	0.0008065	0.0190807	60.3601	29.0385	32.4326	-1.86109	34.2833	42.1451	45.1628	-1.3365	218269_at	ribonuclease type III, nuclear
CALU	0.0003218	0.0098623	54.1769	36.5694	33.1537	-1.63411	37.6975	38.4761	40.5323	-1.33663	238908_at	calumenin
PARP15	1.05e-05	0.0007203	13.9112	7.70489	7.2569	-1.91697	7.53079	12.1013	10.4075	-1.33665	1564310_a_at	poly (ADP-ribose) polymerase family, member 15
DLG3	4.41e-05	0.0021452	48.2793	28.6628	32.2573	-1.49669	34.6232	32.1606	36.0946	-1.33758	212727_at	discs, large homolog 3 (Drosophila)
RPAP1	0.0009767	0.0219939	25.9307	17.2243	19.212	-1.34972	18.9051	22.482	19.3828	-1.33782	218441_s_at	RNA polymerase II associated protein 1
MCM3APAS	4.69e-05	0.0022513	8.72953	5.43477	5.98788	-1.45787	6.88521	6.22992	6.52498	-1.33786	220459_at	MCM3AP antisense RNA (non-protein coding)
ENOSF1	0.0001042	0.0042045	51.7465	24.5063	31.5466	-1.64032	36.8215	41.1465	38.6519	-1.33878	204142_at	enolase superfamily member 1
KLC2	0.0008412	0.0196382	13.9902	9.72656	9.40334	-1.48779	10.2812	10.7307	10.4417	-1.33983	218906_x_at	kinesin light chain 2
NVL	0.000356	0.0106654	43.8716	27.2664	27.6043	-1.5893	29.3289	33.7504	32.7389	-1.34005	207877_s_at	nuclear VCP-like
IMMT	0.0007797	0.0186239	238.803	130.936	137.564	-1.73593	164.39	188.353	178.146	-1.34049	200955_at	inner membrane protein, mitochondrial (mitofilin)
DCTD	0.0004861	0.0134706	67.4997	32.3543	33.401	-2.02089	43.402	53.4382	50.34	-1.34088	201572_x_at	dCMP deaminase
HACL1	4.95e-05	0.0023452	78.0212	45.864	50.3717	-1.54891	57.0124	56.8954	58.1842	-1.34093	223211_at	2-hydroxyacyl-CoA lyase 1
NA	0.0005366	0.0143958	68.8913	37.1402	35.6425	-1.93284	49.053	37.7063	51.372	-1.34103	239755_at	NA
NA	0.0004249	0.0122299	27.7581	14.3528	14.4302	-1.92361	19.3705	20.8523	20.6985	-1.34106	215128_at	NA
L3MBTL2	0.0001982	0.0068716	129.183	87.3854	90.8856	-1.42138	92.1194	104.217	96.3162	-1.34124	223205_s_at	l(3)mbt-like 2 (Drosophila)
RAD1	0.000402	0.0117028	145.303	73.9225	73.0948	-1.98787	116.779	107.259	108.316	-1.34147	204461_x_at	RAD1 homolog (S. pombe)
MLLT6	0.0005956	0.0154995	107.427	90.0507	75.952	-1.41441	82.6283	82.0722	80.0805	-1.34149	225628_s_at	myeloid/lymphoid or mixed-lineage leukemia (trithorax homolog, Drosophila); translocated to, 6
FAM69A	0.0001104	0.0044027	11.2938	5.42426	6.08066	-1.85733	8.01993	8.07023	8.41803	-1.34162	216044_x_at	family with sequence similarity 69, member A
FAM33A	0.0008971	0.0206116	111.04	42.2109	57.6601	-1.92578	78.4803	79.5537	82.7356	-1.34211	225684_at	family with sequence similarity 33, member A
C2orf44	0.0002063	0.0070806	17.9405	11.3317	11.7191	-1.53088	13.1512	13.5247	13.3669	-1.34216	219120_at	chromosome 2 open reading frame 44
HOPX	8.79e-05	0.0036855	106.986	17.7825	52.8563	-2.02409	71.6985	90.0959	79.7107	-1.34218	211597_s_at	HOP homeobox
LRP8	0.000176	0.0062853	45.4307	28.4478	29.7498	-1.52709	38.3916	37.7968	33.8401	-1.34251	208433_s_at	low density lipoprotein receptor-related protein 8, apolipoprotein e receptor
CRYGS	1e-07	1.75e-05	51.8514	32.394	32.6065	-1.59022	37.7762	35.8332	38.6185	-1.34266	223644_s_at	crystallin, gamma S
ITPA	0.0008827	0.0203721	174.617	109.722	108.074	-1.61572	122.566	133.469	130.014	-1.34306	209171_at	inosine triphosphatase (nucleoside triphosphate pyrophosphatase)
DIP2C	5.67e-05	0.0026227	45.7398	30.031	28.0121	-1.63286	33.4646	39.3939	34.0386	-1.34376	212504_at	DIP2 disco-interacting protein 2 homolog C (Drosophila)
NA	4.53e-05	0.0021938	144.094	51.7582	56.8318	-2.53545	75.9918	107.653	107.209	-1.34405	236583_at	NA
RAB7L1	1.7e-06	0.0001798	157.601	61.5124	68.452	-2.30235	106.317	119.642	117.23	-1.34437	218700_s_at	RAB7, member RAS oncogene family-like 1
XPO4	0.0008628	0.0200312	51.4681	32.7005	32.4446	-1.58634	35.1208	45.8822	38.2766	-1.34464	222649_at	exportin 4
CDK5RAP1	4.85e-05	0.0023099	89.8604	60.1194	51.6848	-1.73862	62.1214	68.2416	66.8167	-1.34488	218315_s_at	CDK5 regulatory subunit associated protein 1
RHOF	0.0009547	0.0216231	375.369	214.456	233.544	-1.60727	262.702	261.574	279.04	-1.34522	219045_at	ras homolog gene family, member F (in filopodia)
HDLBP	0.000822	0.0193053	75.0288	57.0155	52.381	-1.43237	50.1503	65.7475	55.7643	-1.34546	225012_at	high density lipoprotein binding protein
OSBPL5	0.0006285	0.0159755	118.155	72.9417	65.7015	-1.79836	77.6004	86.7563	87.7965	-1.34578	223464_at	oxysterol binding protein-like 5
DTYMK	0.0007308	0.0178059	45.2357	31.6336	27.7305	-1.63126	34.0449	33.698	33.6118	-1.34583	203270_at	deoxythymidylate kinase (thymidylate kinase)
RPL13A	5.2e-06	0.0004243	7762.79	4755.29	4900.88	-1.58396	5714.73	5563.83	5763.37	-1.34692	210646_x_at	ribosomal protein L13a
NF2	0.0001793	0.0063693	94.2081	57.311	60.1307	-1.56672	59.9734	67.7841	69.9119	-1.34753	218915_at	neurofibromin 2 (merlin)
IPO5	0.0003433	0.0103473	102.752	52.6355	61.167	-1.67986	71.8581	63.8761	76.2056	-1.34835	211955_at	importin 5
TEX10	0.0004575	0.0129098	46.4759	27.3	30.055	-1.54636	28.8858	37.1513	34.4633	-1.34856	218104_at	testis expressed 10
UBE2G2	9.45e-05	0.0038995	676.254	385.735	374.655	-1.80501	511.82	462.079	501.153	-1.3494	209042_s_at	ubiquitin-conjugating enzyme E2G 2 (UBC7 homolog, yeast)
CCND2	0.0005369	0.0143968	226.946	54.2424	99.2773	-2.28598	134.474	152.837	167.986	-1.35098	200953_s_at	cyclin D2
ZNF275	0.0005753	0.0150861	45.1237	22.9208	26.4153	-1.70824	28.7962	34.1687	33.3978	-1.3511	225382_at	zinc finger protein 275
GPR18	1.49e-05	0.00093	191.482	49.1016	80.5827	-2.37622	124.822	160.478	141.58	-1.35246	210279_at	G protein-coupled receptor 18
RPS9	0.0005061	0.0138563	3964.25	2786.72	2797.79	-1.41692	3175.01	2766.62	2929.71	-1.35312	217747_s_at	ribosomal protein S9
PHLDB2	0.0008909	0.0205181	5.54435	4.0131	4.07361	-1.36104	4.45815	4.00268	4.09609	-1.35357	1557578_at	pleckstrin homology-like domain, family B, member 2
GNPNAT1	7.23e-05	0.0031897	43.0129	21.8981	22.5768	-1.90518	31.9138	35.1435	31.7768	-1.35359	225853_at	glucosamine-phosphate N-acetyltransferase 1
RABL4	4.4e-05	0.0021452	36.3833	28.9757	24.6917	-1.47351	26.0067	32.4569	26.8674	-1.35418	213784_at	RAB, member of RAS oncogene family-like 4
USP14	1.65e-05	0.001008	87.7991	34.8462	39.2014	-2.23969	60.029	56.3568	64.8132	-1.35465	226567_at	ubiquitin specific peptidase 14 (tRNA-guanine transglycosylase)
MRPS26	0.000756	0.018225	82.5983	50.5533	45.7912	-1.8038	52.6986	57.1573	60.9556	-1.35506	225196_s_at	mitochondrial ribosomal protein S26
LOC728554	2.71e-05	0.0014729	94.8135	50.1748	54.6672	-1.73438	59.7036	66.6165	69.9558	-1.35533	224623_at	similar to THO complex 3
TMEM5	3.23e-05	0.0016964	73.4696	44.8088	35.752	-2.05498	44.2679	53.0181	54.2011	-1.3555	204808_s_at	transmembrane protein 5
NA	0.0002095	0.0071535	20.3185	14.9967	13.3561	-1.52129	13.2848	15.7636	14.9843	-1.35598	241846_at	NA
FARSA	8.71e-05	0.0036745	87.6024	65.932	53.8978	-1.62534	62.2613	57.2909	64.5913	-1.35626	202159_at	phenylalanyl-tRNA synthetase, alpha subunit
PAICS	9.2e-06	0.0006499	59.2615	23.9984	26.2747	-2.25546	41.1732	44.5525	43.6839	-1.3566	201013_s_at	phosphoribosylaminoimidazole carboxylase, phosphoribosylaminoimidazole succinocarboxamide synthetase
C22orf32	0.0009931	0.0222144	472.755	296.758	291.313	-1.62284	348.019	363.871	348.422	-1.35685	225794_s_at	chromosome 22 open reading frame 32
EIF3K	0.0009419	0.0213864	1345.34	950.36	951.388	-1.41408	1060.74	1048.01	991.486	-1.35689	212716_s_at	eukaryotic translation initiation factor 3, subunit K
TSEN2	6.44e-05	0.0029076	18.4417	10.6135	11.6529	-1.58258	13.7421	13.0039	13.5899	-1.35701	219581_at	tRNA splicing endonuclease 2 homolog (S. cerevisiae)
FAM153B	0.0009334	0.021264	11.2123	7.41407	7.40367	-1.51442	8.04756	7.08904	8.26118	-1.35723	215133_s_at	family with sequence similarity 153, member B
PPM1K	3e-07	4.57e-05	154.744	43.4094	53.0566	-2.91658	107.775	107.463	113.999	-1.35742	235061_at	protein phosphatase 1K (PP2C domain containing)
MPRIP	8.5e-06	0.0006172	138.007	73.7455	76.2541	-1.80983	95.4843	111.961	101.551	-1.35899	214771_x_at	myosin phosphatase Rho interacting protein
TNFRSF4	0.0002424	0.0079218	40.3206	21.5516	23.5884	-1.70934	26.5931	25.1069	29.6658	-1.35916	214228_x_at	tumor necrosis factor receptor superfamily, member 4
NA	5.76e-05	0.0026554	7.93298	5.8555	5.25185	-1.51051	5.29212	4.99775	5.83541	-1.35946	1561152_a_at	NA
TGS1	0.0004832	0.0134243	52.1028	30.1093	30.9786	-1.68189	38.7464	43.9421	38.3062	-1.36017	219231_at	trimethylguanosine synthase homolog (S. cerevisiae)
GANAB	0.0007526	0.0181751	238.757	187.978	149.113	-1.60118	170.607	184.749	175.519	-1.36029	214626_s_at	glucosidase, alpha; neutral AB
C14orf93	0.0005414	0.0144748	39.7829	35.6497	30.2989	-1.31301	36.2326	32.4407	29.2123	-1.36185	219009_at	chromosome 14 open reading frame 93
DARS	0.0005452	0.0145409	772.217	487.994	426.105	-1.81227	609.539	590.648	566.908	-1.36216	201623_s_at	aspartyl-tRNA synthetase
DPH5	0.0003804	0.0112	16.6345	9.69827	9.17469	-1.81309	11.8094	10.7239	12.2012	-1.36335	224060_s_at	DPH5 homolog (S. cerevisiae)
DNPEP	0.0003209	0.0098458	329.654	197.061	179.709	-1.83438	210.455	242.838	241.749	-1.36362	38703_at	aspartyl aminopeptidase
NGDN	9.24e-05	0.0038272	88.7319	49.555	55.6584	-1.59422	63.0067	55.1708	65.0662	-1.36372	213794_s_at	neuroguidin, EIF4E binding protein
MUM1	1.06e-05	0.0007226	78.4001	47.1285	45.063	-1.73979	48.9704	52.9118	57.4895	-1.36373	223347_at	melanoma associated antigen (mutated) 1
SPATS2	0.0006326	0.0160498	29.5078	19.7595	19.6739	-1.49985	23.9893	24.2397	21.627	-1.3644	222593_s_at	spermatogenesis associated, serine-rich 2
ZNF248	1.25e-05	0.0008185	16.7513	12.2488	10.2876	-1.62829	12.5552	13.9523	12.277	-1.36444	213269_at	zinc finger protein 248
RPL12	8.7e-06	0.0006275	3019.87	1708.94	2249.46	-1.34248	2606.02	2444.7	2212.02	-1.36521	214271_x_at	ribosomal protein L12
CNPY4	9e-07	0.0001096	67.2596	40.9257	42.1754	-1.59476	47.8634	51.6205	49.256	-1.36551	227313_at	canopy 4 homolog (zebrafish)
TOE1	3e-06	0.0002711	113.599	80.1989	74.0447	-1.53419	87.7106	80.8591	83.1743	-1.36579	204080_at	target of EGR1, member 1 (nuclear)
NA	0.0004438	0.0126182	12.2014	7.14336	8.54837	-1.42734	8.66708	8.83578	8.93238	-1.36598	240394_at	NA
HAX1	8.3e-06	0.0006067	312.568	200.137	194.186	-1.60963	223.804	228.902	228.713	-1.36664	201145_at	HCLS1 associated protein X-1
ZDHHC8	2.7e-05	0.0014689	42.9584	27.1027	26.5767	-1.6164	30.0594	34.1294	31.3999	-1.36811	225744_at	zinc finger, DHHC-type containing 8
URG4	8.2e-05	0.0035136	69.483	46.8455	41.8851	-1.65889	46.3108	53.9005	50.78	-1.36831	218601_at	up-regulated gene 4
LUC7L	0.0005048	0.0138346	79.1609	49.4247	37.9837	-2.08407	51.963	63.809	57.8173	-1.36915	223295_s_at	LUC7-like (S. cerevisiae)
RPS16	8.9e-06	0.0006336	5492.08	3389.92	3221.01	-1.70508	3881.68	4097.85	4011.11	-1.36922	213890_x_at	ribosomal protein S16
TSEN54	0.0001231	0.0048006	82.5353	48.5143	55.554	-1.48568	56.5169	64.8264	60.2576	-1.36971	1558304_s_at	tRNA splicing endonuclease 54 homolog (S. cerevisiae)
PDZK1P1	0.0007317	0.0178113	8.05084	5.32803	5.69174	-1.41448	5.818	6.18367	5.87709	-1.36987	240634_x_at	PDZ domain containing 1 pseudogene 1
NA	0.000341	0.0102893	9.3326	7.20732	7.06194	-1.32153	6.89762	8.15686	6.81115	-1.37019	243005_at	NA
NDRG2	0.0004334	0.0123934	65.7202	48.218	44.0454	-1.4921	44.3084	45.1822	47.9575	-1.37038	206453_s_at	NDRG family member 2
DNMT1	3.82e-05	0.0019357	44.4275	14.7472	19.0044	-2.33775	23.9999	30.3829	32.401	-1.37117	201697_s_at	DNA (cytosine-5-)-methyltransferase 1
IL21R	0.0009063	0.0207504	43.0084	24.8991	22.7083	-1.89394	29.0001	30.6155	31.358	-1.37153	219971_at	interleukin 21 receptor
ALG1	0.0005021	0.0137882	7.66769	6.18021	5.06707	-1.51324	5.14601	5.10119	5.58915	-1.37189	236626_at	asparagine-linked glycosylation 1, beta-1,4-mannosyltransferase homolog (S. cerevisiae)
C12orf30	0.0009142	0.0208788	33.4744	21.3841	18.3841	-1.82083	25.4849	27.58	24.3892	-1.37251	227245_at	chromosome 12 open reading frame 30
NA	0.0001172	0.0046266	28.6463	18.1393	16.3733	-1.74958	22.2944	22.6311	20.863	-1.37307	1560095_s_at	NA
SMAD3	6.09e-05	0.0027724	90.9806	47.8127	46.4037	-1.96063	58.9482	63.8456	66.2541	-1.37321	218284_at	SMAD family member 3
NA	0.0004438	0.0126182	6.03526	4.02879	4.00282	-1.50775	4.60426	4.95781	4.39496	-1.37322	244511_at	NA
RPL29	8e-06	0.0005879	4656	2539.86	2861.64	-1.62704	3463.37	3394.87	3390.23	-1.37336	213969_x_at	ribosomal protein L29
RPL27A	7e-07	8.86e-05	5756.18	3373.58	3541.69	-1.62526	4412.58	4283.46	4188.93	-1.37414	203034_s_at	ribosomal protein L27a
MAPKBP1	8.44e-05	0.0035883	50.6349	38.0082	33.3004	-1.52055	33.4774	33.3119	36.8036	-1.37581	213394_at	mitogen-activated protein kinase binding protein 1
PATZ1	0.0003206	0.0098458	46.6588	27.6225	29.0878	-1.60407	34.6949	35.7539	33.907	-1.37608	209494_s_at	POZ (BTB) and AT hook containing zinc finger 1
POLR2H	0.0002627	0.0084192	80.2987	47.8693	48.1895	-1.66631	57.6915	68.7826	58.3306	-1.37661	209302_at	polymerase (RNA) II (DNA directed) polypeptide H
FNBP4	9.98e-05	0.0040711	24.8089	15.7866	13.4298	-1.84729	19.3333	18.5079	18.0044	-1.37793	242472_x_at	formin binding protein 4
ACSS1	8.8e-06	0.0006281	161.503	109.654	94.0715	-1.71681	115.47	117.861	117.206	-1.37793	224882_at	acyl-CoA synthetase short-chain family member 1
GOLGA2L1	0.0001313	0.005052	23.7585	15.6086	14.7046	-1.61572	17.3983	13.639	17.2417	-1.37797	219876_s_at	golgi autoantigen, golgin subfamily a, 2-like 1
DYRK2	8.4e-06	0.0006107	38.9282	13.794	19.2587	-2.02133	23.2838	29.2213	28.2472	-1.37812	202968_s_at	dual-specificity tyrosine-(Y)-phosphorylation regulated kinase 2
LAGE3	0.0002796	0.0088653	179.791	112.491	102.845	-1.74818	127.267	141.448	130.439	-1.37835	219061_s_at	L antigen family, member 3
TIGIT	9.6e-06	0.0006721	37.1081	12.2669	14.7342	-2.5185	17.1774	24.8812	26.9119	-1.37887	240070_at	T cell immunoreceptor with Ig and ITIM domains
LOC100233209	2.74e-05	0.0014833	11.9006	6.40723	7.24992	-1.64148	7.72841	7.96922	8.62766	-1.37936	241947_at	hypothetical LOC100233209
RPL18	0.0005783	0.015143	39.8015	25.9307	22.2274	-1.79065	27.4917	27.318	28.8452	-1.37983	222297_x_at	ribosomal protein L18
ZNF563	5.5e-06	0.000439	11.3632	7.28117	7.3081	-1.55488	7.12535	7.55111	8.23245	-1.3803	1552770_s_at	zinc finger protein 563
ADCK2	0.0007542	0.0181896	74.0885	52.3774	44.1302	-1.67886	52.2485	53.1363	53.652	-1.38091	44120_at	aarF domain containing kinase 2
C2orf28	4.24e-05	0.0020979	595.766	367.202	355.906	-1.67394	431.555	435.003	431.253	-1.38148	219329_s_at	chromosome 2 open reading frame 28
C12orf66	6.29e-05	0.0028493	8.83287	5.28145	5.25142	-1.682	5.71468	5.97424	6.39025	-1.38224	235026_at	chromosome 12 open reading frame 66
FGFR1	4.57e-05	0.0022112	7.49407	5.58777	4.72143	-1.58725	5.92305	5.56734	5.41919	-1.38288	222164_at	fibroblast growth factor receptor 1
WDR4	0.0004557	0.012878	15.063	8.78484	7.70876	-1.95401	11.5418	12.5328	10.8889	-1.38333	235551_at	WD repeat domain 4
DTWD1	0.0005145	0.0140185	93.6564	52.2111	44.7462	-2.09306	70.8046	75.9812	67.7002	-1.3834	236649_at	DTW domain containing 1
FOXP1	0.0005393	0.0144328	655.48	401.336	364.539	-1.79811	470.932	443.063	473.79	-1.38348	224838_at	forkhead box P1
SUPV3L1	3.4e-06	0.0003003	29.4052	14.3327	16.9423	-1.73561	21.3675	19.928	21.2519	-1.38365	212894_at	suppressor of var1, 3-like 1 (S. cerevisiae)
C11orf31	0.0001016	0.0041209	430.91	264.253	230.259	-1.87141	327.333	313.793	311.306	-1.3842	224677_x_at	chromosome 11 open reading frame 31
DPH5	0.0001077	0.0043202	150.289	99.244	83.6064	-1.79758	105.133	108.742	108.574	-1.38421	223671_x_at	DPH5 homolog (S. cerevisiae)
KIAA1529	7.52e-05	0.0032788	16.2233	10.9146	10.1503	-1.59831	11.1501	11.298	11.7202	-1.38422	229628_s_at	KIAA1529
TRA@	0.0002	0.0069078	21.6652	10.291	11.575	-1.87172	15.6778	15.4453	15.6494	-1.38441	224343_x_at	T cell receptor alpha locus
SYT11	0.0001504	0.0055824	74.6029	38.3955	32.3482	-2.30624	46.5898	45.3357	53.8779	-1.38467	209197_at	synaptotagmin XI
BMPR2	0.0007512	0.0181493	77.1349	41.5212	33.6506	-2.29223	61.2324	59.3932	55.7021	-1.38477	231873_at	bone morphogenetic protein receptor, type II (serine/threonine kinase)
GSS	0.000841	0.0196382	77.9539	49.884	54.4671	-1.43121	56.3414	58.3184	56.2895	-1.38487	211630_s_at	glutathione synthetase
GPR68	6e-06	0.00047	56.1921	28.0009	39.0473	-1.43908	41.9834	42.4885	40.5747	-1.3849	229055_at	G protein-coupled receptor 68
ZNF202	1.18e-05	0.0007811	37.6244	17.2182	20.1969	-1.86289	26.4209	28.8281	27.1586	-1.38536	204327_s_at	zinc finger protein 202
NA	3.1e-06	0.0002779	19.6191	8.35482	10.2846	-1.90762	13.249	16.3492	14.1581	-1.38571	1556952_at	NA
NA	0.0004849	0.013451	6.03762	4.14225	3.85011	-1.56817	4.36356	4.35992	4.35528	-1.38628	1559006_at	NA
RPL5	0.0005524	0.0146756	22.1667	9.66058	10.5057	-2.10996	14.8503	13.3699	15.9874	-1.38651	213689_x_at	ribosomal protein L5
RPS28	3.14e-05	0.0016555	5139.4	3773.48	3115.89	-1.64941	3855.17	4047	3706.13	-1.38673	208904_s_at	ribosomal protein S28
CLEC2D	8e-07	9.9e-05	36.8901	14.4983	15.5375	-2.37427	22.2957	25.8604	26.5966	-1.38702	235522_at	C-type lectin domain family 2, member D
SLC35C2	0.0001755	0.0062798	247.903	253.842	177.476	-1.39683	187.995	184.428	178.711	-1.38717	225037_at	solute carrier family 35, member C2
DPH5	2.6e-06	0.0002443	155.403	96.9905	79.1992	-1.96218	105.841	111.642	111.976	-1.38783	224196_x_at	DPH5 homolog (S. cerevisiae)
ZNF575	0.0002251	0.0075032	37.7297	24.3192	25.3226	-1.48996	28.3797	28.9069	27.1843	-1.38792	1557119_a_at	zinc finger protein 575
SRP68	0.0004323	0.0123878	237.176	130.679	139.65	-1.69837	153.406	164.367	170.885	-1.38793	224607_s_at	signal recognition particle 68kDa
SNRPD3	0.0003646	0.0108724	557.024	389.654	361.418	-1.54122	424.189	380.143	401.256	-1.3882	202567_at	small nuclear ribonucleoprotein D3 polypeptide 18kDa
RPAIN	6.53e-05	0.0029385	13.7823	7.43596	8.56229	-1.60965	9.37219	10.5993	9.92434	-1.38873	1556088_at	RPA interacting protein
RSL1D1	0.0001503	0.0055824	135.714	60.7108	69.2149	-1.96076	90.4541	92.607	97.7156	-1.38886	212018_s_at	ribosomal L1 domain containing 1
DNAJA3	0.0007834	0.0186796	110.265	55.9186	65.0869	-1.69412	71.8527	88.0806	79.3487	-1.38962	1554078_s_at	DnaJ (Hsp40) homolog, subfamily A, member 3
NUP188	0.000175	0.006266	84.8488	59.0828	53.1781	-1.59556	61.7179	64.1792	61.0259	-1.39037	212691_at	nucleoporin 188kDa
LYRM2	0.0005439	0.0145133	32.7299	17.5951	19.6876	-1.66246	23.5036	24.9769	23.5351	-1.39069	227712_at	LYR motif containing 2
C6orf105	2.41e-05	0.0013459	6.30622	4.67429	4.19405	-1.50361	4.71909	4.5742	4.53455	-1.3907	229070_at	chromosome 6 open reading frame 105
NISCH	0.0001472	0.0054974	786.134	578.707	506.568	-1.55188	546.443	571.959	565.266	-1.39073	201591_s_at	nischarin
PRPF8	0.0001473	0.0054974	332.667	218.626	211.842	-1.57036	210.967	248.037	239.201	-1.39074	200000_s_at	PRP8 pre-mRNA processing factor 8 homolog (S. cerevisiae)
C2CD2	9.75e-05	0.0039991	36.9016	23.1394	20.1145	-1.83457	23.4731	27.5049	26.5335	-1.39076	212875_s_at	C2 calcium-dependent domain containing 2
GPR89B	0.0001866	0.0065526	76.3023	38.5891	42.0425	-1.81489	45.6445	58.7527	54.8327	-1.39155	223531_x_at	G protein-coupled receptor 89B
LONP1	0.0006594	0.016485	97.0024	64.3875	56.9664	-1.7028	62.4869	72.4544	69.7079	-1.39156	209017_s_at	lon peptidase 1, mitochondrial
RPS19	0.0001783	0.0063467	5883.35	3484.96	3310.26	-1.77731	4040.06	4174.48	4227.7	-1.39162	213414_s_at	ribosomal protein S19
ADARB1	0.0009035	0.0207036	40.5533	16.3767	20.423	-1.98566	24.4365	31.7687	29.1256	-1.39236	203865_s_at	adenosine deaminase, RNA-specific, B1 (RED1 homolog rat)
PDDC1	6.03e-05	0.0027543	95.5605	64.9623	54.4133	-1.7562	61.2177	57.5862	68.6229	-1.39254	227968_at	Parkinson disease 7 domain containing 1
C6orf48	0.0004334	0.0123934	387.907	203.451	240.891	-1.6103	311.111	326.592	278.514	-1.39277	220755_s_at	chromosome 6 open reading frame 48
AAK1	< 1e-07	< 1e-07	134.161	62.4855	69.0042	-1.94424	77.097	86.9077	96.3252	-1.39279	225522_at	AP2 associated kinase 1
RORA	0.0001388	0.0052483	16.5558	9.93864	10.4559	-1.58339	10.7618	11.2345	11.884	-1.39313	1562682_at	RAR-related orphan receptor A
RPL10L	0.0003675	0.0109201	14.0624	8.33063	8.99844	-1.56276	10.7542	10.1035	10.0933	-1.39325	217559_at	ribosomal protein L10-like
ANAPC1	6.18e-05	0.0028064	53.8	26.8291	28.1396	-1.9119	35.3103	39.3873	38.6062	-1.39356	218575_at	anaphase promoting complex subunit 1
LOC644617	0.0002124	0.007213	81.6762	51.0378	47.9768	-1.70241	60.4414	66.8646	58.6084	-1.39359	221235_s_at	hypothetical LOC644617
MGC57346	4e-07	5.79e-05	30.105	22.5964	18.0839	-1.66474	21.4486	21.6177	21.6018	-1.39363	1568987_at	hypothetical LOC401884
MYO6	0.0005719	0.0150258	9.42445	5.55575	5.07316	-1.85771	6.05369	6.65277	6.76036	-1.39408	203215_s_at	myosin VI
RSBN1L	0.0009803	0.0220522	202.034	258.037	178.783	-1.13006	186.096	155.765	144.875	-1.39454	232221_x_at	round spermatid basic protein 1-like
ZNF101	0.0001855	0.0065265	36.7643	25.9393	21.1139	-1.74124	27.008	26.3087	26.3609	-1.39466	1552633_at	zinc finger protein 101
TSR2	0.0001644	0.0059645	92.0954	59.7044	61.5182	-1.49704	67.4811	64.2335	66.0176	-1.39501	213079_at	TSR2, 20S rRNA accumulation, homolog (S. cerevisiae)
GCN1L1	< 1e-07	< 1e-07	163.861	103.441	84.0321	-1.94998	93.3144	101.654	117.441	-1.39527	212139_at	GCN1 general control of amino-acid synthesis 1-like 1 (yeast)
DVL1	0.000227	0.0075448	54.6238	43.9405	34.4636	-1.58497	37.8219	40.4252	39.1475	-1.39533	203230_at	dishevelled, dsh homolog 1 (Drosophila)
CRTC3	3e-07	4.57e-05	423.294	212.306	194.802	-2.17295	242.609	315.664	303.358	-1.39536	218648_at	CREB regulated transcription coactivator 3
TAF1C	2.17e-05	0.0012442	104.433	61.214	54.7931	-1.90595	67.0691	73.8265	74.8181	-1.39582	203938_s_at	TATA box binding protein (TBP)-associated factor, RNA polymerase I, C, 110kDa
RPL4	0.0001279	0.004942	2577.33	1412.78	1441.82	-1.78755	1700.21	1694.35	1846.32	-1.39592	200089_s_at	ribosomal protein L4
PHF19	5e-07	6.78e-05	127.295	76.3446	71.118	-1.78991	73.8011	86.1811	91.1762	-1.39614	225533_at	PHD finger protein 19
TRIM74	8.23e-05	0.0035182	55.3805	42.0297	37.0514	-1.49469	38.2388	41.6068	39.6655	-1.39619	1554183_s_at	tripartite motif-containing 74
GOT2	2.4e-06	0.0002294	142.233	70.8044	78.5087	-1.81169	91.3511	103.654	101.864	-1.39631	200708_at	glutamic-oxaloacetic transaminase 2, mitochondrial (aspartate aminotransferase 2)
CYP2R1	0.000283	0.0089491	11.5066	8.20864	6.8263	-1.68562	8.47733	8.38454	8.23998	-1.39643	207786_at	cytochrome P450, family 2, subfamily R, polypeptide 1
PLXNC1	0.0003687	0.0109439	25.1969	20.1917	16.7615	-1.50326	19.3174	18.9644	18.0362	-1.39702	235328_at	plexin C1
EIF5B	4.5e-06	0.0003791	15.7358	8.08016	8.2452	-1.90848	9.93347	11.9052	11.2627	-1.39716	201025_at	eukaryotic translation initiation factor 5B
RAB11FIP5	0.000602	0.0155602	49.4609	32.209	31.5055	-1.56991	32.1674	28.1672	35.3925	-1.39749	210879_s_at	RAB11 family interacting protein 5 (class I)
FN3KRP	0.0006782	0.0168472	90.7085	57.967	54.833	-1.65427	59.9583	71.8907	64.8963	-1.39774	218210_at	fructosamine 3 kinase related protein
PRDM15	8.93e-05	0.0037214	44.5485	28.6924	25.93	-1.71803	29.771	31.0293	31.868	-1.39791	231931_at	PR domain containing 15
SDAD1	4.08e-05	0.0020409	68.2043	33.6089	33.1097	-2.05995	47.7919	63.8785	48.7855	-1.39804	218607_s_at	SDA1 domain containing 1
NA	4.1e-06	0.0003475	16.0026	8.23976	7.56021	-2.11668	11.4921	11.0695	11.445	-1.39821	1559037_a_at	NA
RPL7A	0.0005683	0.0149527	4159.01	2188.55	2568.56	-1.6192	2992.02	3119.66	2972.75	-1.39905	224930_x_at	ribosomal protein L7a
LOC646808	0.0004745	0.0132567	139.916	94.3968	87.0003	-1.60823	95.6177	93.3188	99.9959	-1.39922	222338_x_at	hypothetical LOC646808
RPS14	8e-07	9.9e-05	5083.65	2997.68	3307.72	-1.53691	4027.44	4083.72	3633.17	-1.39923	208645_s_at	ribosomal protein S14
MRPL24	3.95e-05	0.001985	85.5278	57.794	53.8676	-1.58774	62.3513	62.771	61.1134	-1.39949	218270_at	mitochondrial ribosomal protein L24
EDC3	0.0003049	0.0094557	118.459	91.7514	76.464	-1.54921	79.2602	90.7959	84.598	-1.40026	226042_at	enhancer of mRNA decapping 3 homolog (S. cerevisiae)
ZNF783	1e-07	1.75e-05	103.398	55.2271	56.5085	-1.82978	69.4128	69.6198	73.829	-1.40051	221876_at	zinc finger family member 783
TAF1B	1.91e-05	0.0011326	28.2177	16.3441	15.7396	-1.79279	18.4283	22.3066	20.1431	-1.40086	235878_at	TATA box binding protein (TBP)-associated factor, RNA polymerase I, B, 63kDa
SSBP4	0.0005163	0.0140356	180.466	91.7778	94.1609	-1.91657	106.594	119.749	128.82	-1.40092	229269_x_at	single stranded DNA binding protein 4
PRKRIP1	0.0004121	0.0119404	125.68	91.393	78.4434	-1.60217	80.3066	86.0377	89.6726	-1.40154	218378_s_at	PRKR interacting protein 1 (IL11 inducible)
DIS3L	1.89e-05	0.0011232	105.543	45.3242	53.574	-1.97004	73.3156	77.1504	75.299	-1.40165	235005_at	DIS3 mitotic control homolog (S. cerevisiae)-like
COQ4	9.29e-05	0.0038421	67.6815	43.0149	39.5414	-1.71166	47.7765	46.9602	48.2805	-1.40184	218328_at	coenzyme Q4 homolog (S. cerevisiae)
PITRM1	0.0009845	0.0221148	79.9549	40.7396	54.3205	-1.47191	50.8393	56.8137	57.0291	-1.402	205273_s_at	pitrilysin metallopeptidase 1
TRIB2	0.0005589	0.014798	30.4059	14.2559	16.2	-1.87691	19.7928	19.0447	21.6754	-1.40278	202479_s_at	tribbles homolog 2 (Drosophila)
SIN3A	6.92e-05	0.0030835	29.7516	13.7167	17.7943	-1.67197	18.0876	22.0471	21.1969	-1.40358	238005_s_at	SIN3 homolog A, transcription regulator (yeast)
TP53I13	0.000225	0.0075032	86.6655	61.0594	54.8659	-1.57959	59.861	55.6409	61.7407	-1.4037	225605_at	tumor protein p53 inducible protein 13
C18orf22	0.0002609	0.0084009	58.0327	33.8294	33.5102	-1.73179	38.2659	35.3848	41.34	-1.40379	219419_at	chromosome 18 open reading frame 22
RASGRP1	1e-07	1.75e-05	99.187	13.3032	28.3772	-3.49531	52.5488	62.8689	70.6502	-1.40392	205590_at	RAS guanyl releasing protein 1 (calcium and DAG-regulated)
BMS1	5e-07	6.78e-05	119.271	70.9606	68.3146	-1.7459	80.0153	80.8203	84.9542	-1.40394	203082_at	BMS1 homolog, ribosome assembly protein (yeast)
EP400NL	0.0007112	0.0174293	16.8443	11.3664	11.4884	-1.4662	11.4616	12.0375	11.9973	-1.40401	229892_at	EP400 N-terminal like
SMYD5	0.0004333	0.0123934	52.9864	33.736	31.2142	-1.69751	36.7499	36.5441	37.7127	-1.405	209516_at	SMYD family member 5
ZNF473	0.0007511	0.0181493	15.1995	10.5084	10.5378	-1.44238	11.277	12.7337	10.8143	-1.4055	213124_at	zinc finger protein 473
MYBBP1A	0.0007105	0.01742	12.0175	8.0184	8.2817	-1.45109	8.77653	8.82759	8.54895	-1.40573	233803_s_at	MYB binding protein (P160) 1a
CBX6	0.0008381	0.0195993	368.74	263.984	221.496	-1.66477	251.172	235.664	262.198	-1.40634	202048_s_at	chromobox homolog 6
ACOT4	0.0009932	0.0222144	13.4448	7.19521	7.34593	-1.83024	9.04142	9.17447	9.55206	-1.40753	229534_at	acyl-CoA thioesterase 4
CAPN2	0.0006858	0.0169894	27.4165	14.114	17.5006	-1.5666	18.5667	19.3574	19.4739	-1.40786	214888_at	calpain 2, (m/II) large subunit
IL27RA	2.65e-05	0.0014489	148.494	84.1597	66.8929	-2.21988	75.7745	99.7402	105.424	-1.40855	222062_at	interleukin 27 receptor, alpha
HUWE1	0.0003159	0.0097416	234.8	135.379	149.074	-1.57506	143.949	163.612	166.65	-1.40894	208598_s_at	HECT, UBA and WWE domain containing 1
NA	0.000131	0.0050475	7.45014	4.53606	5.19643	-1.4337	5.08133	5.34389	5.28733	-1.40905	233127_at	NA
PIK3R1	0.0002155	0.0072799	154.045	71.7419	71.482	-2.15502	96.9445	113.629	109.269	-1.40977	212239_at	phosphoinositide-3-kinase, regulatory subunit 1 (alpha)
NA	0.0003113	0.0096106	43.4782	29.7484	30.0981	-1.44455	30.0874	35.5035	30.829	-1.4103	236961_at	NA
BRD9	0.0001168	0.0046221	125.697	91.5209	84.965	-1.4794	85.7425	93.5545	89.1122	-1.41055	220155_s_at	bromodomain containing 9
EEF1G	4.2e-06	0.0003549	4585.8	2489.15	2815.31	-1.62888	3350.39	3164.98	3250.16	-1.41094	211927_x_at	eukaryotic translation elongation factor 1 gamma
INPP4B	7.4e-06	0.000555	14.5486	5.79881	6.5371	-2.22554	9.37225	7.60512	10.3088	-1.41128	205376_at	inositol polyphosphate-4-phosphatase, type II, 105kDa
TRBV7-3	0.0004689	0.0131405	44.3623	26.0039	26.681	-1.6627	30.4228	23.7404	31.4168	-1.41206	234883_x_at	T cell receptor beta variable 7-3
RPL13	3.5e-06	0.0003077	5785.7	3550.56	3551.05	-1.62929	4412.25	4253.4	4097.14	-1.41213	214351_x_at	ribosomal protein L13
PWP1	2.2e-06	0.0002156	215.143	110.085	116.197	-1.85154	140.156	141.737	152.317	-1.41247	201608_s_at	PWP1 homolog (S. cerevisiae)
CLEC3B	2.5e-06	0.0002369	88.3288	64.3854	54.5685	-1.61868	64.6426	67.5049	62.5323	-1.41253	213648_at	C-type lectin domain family 3, member B
PMS2L5	0.0004765	0.0133057	48.0807	27.489	21.3627	-2.25069	35.267	35.6697	34.0387	-1.41253	242201_at	postmeiotic segregation increased 2-like 5
NCL	8.88e-05	0.0037062	315.429	161.237	167.847	-1.87927	186.979	194.356	223.296	-1.41261	200610_s_at	nucleolin
KIAA1967	2.4e-06	0.0002294	102.103	67.5166	61.454	-1.66145	70.0924	65.0305	72.2796	-1.41261	225187_at	KIAA1967
EIF2B4	0.0002512	0.0081461	196.57	136.884	128.13	-1.53414	130.737	132.613	139.153	-1.41262	215482_s_at	eukaryotic translation initiation factor 2B, subunit 4 delta, 67kDa
NA	0.0004559	0.012878	26.2595	16.5097	16.9296	-1.5511	20.9031	15.6538	18.587	-1.41279	1560137_at	NA
NA	3.4e-06	0.0003003	10.1157	5.31896	5.31422	-1.90351	7.58183	6.40313	7.15927	-1.41295	1568813_at	NA
MRP63	5.95e-05	0.0027292	593.093	367.795	326.761	-1.81507	441.843	420.753	419.723	-1.41306	204386_s_at	mitochondrial ribosomal protein 63
MRPS24	8.8e-06	0.0006281	1000.93	628.039	525.246	-1.90564	711.703	741.852	708.065	-1.41361	224948_at	mitochondrial ribosomal protein S24
QARS	1.35e-05	0.0008613	999.004	597.776	540.041	-1.84987	662.818	667.671	706.682	-1.41365	217846_at	glutaminyl-tRNA synthetase
GARS	0.0004541	0.0128642	354.793	251.81	220.029	-1.61248	228.659	221.245	250.75	-1.41493	208693_s_at	glycyl-tRNA synthetase
ERBB2	0.0004406	0.0125533	38.6286	23.0573	22.8418	-1.69114	25.1156	26.6447	27.299	-1.41502	216836_s_at	v-erb-b2 erythroblastic leukemia viral oncogene homolog 2, neuro/glioblastoma derived oncogene homolog (avian)
CELSR3	0.0006222	0.0158744	18.0707	11.3331	10.6492	-1.69692	12.17	11.3477	12.7703	-1.41506	205165_at	cadherin, EGF LAG seven-pass G-type receptor 3 (flamingo homolog, Drosophila)
ADSL	9.83e-05	0.0040229	204.589	121.883	110.526	-1.85106	144.741	145.349	144.543	-1.41543	202144_s_at	adenylosuccinate lyase
KLHL34	8.1e-05	0.0034817	6.2375	4.35662	3.93857	-1.5837	4.44534	4.21002	4.4067	-1.41546	1553873_at	kelch-like 34 (Drosophila)
STARD10	0.0001216	0.0047659	103.108	214.52	111.863	1.08491	105.767	80.031	72.8303	-1.41573	232322_x_at	StAR-related lipid transfer (START) domain containing 10
TMEM138	1.13e-05	0.0007581	136.091	79.4823	71.5144	-1.90299	94.6076	105.712	96.0416	-1.417	223113_at	transmembrane protein 138
PFKP	0.000347	0.0104306	238.343	117.156	135.126	-1.76385	136.189	174.664	168.162	-1.41734	201037_at	phosphofructokinase, platelet
THADA	0.00052	0.0141097	168.991	111.433	95.3022	-1.77321	115.979	119.657	119.207	-1.41763	220212_s_at	thyroid adenoma associated
RPL15	5.25e-05	0.0024534	2224.89	1223.58	1223.38	-1.81864	1594.28	1598.74	1568.59	-1.4184	221475_s_at	ribosomal protein L15
NA	1.32e-05	0.0008491	27.1592	7.49521	11.0184	-2.4649	17.4844	18.9526	19.1398	-1.41899	231241_at	NA
RPL4	0.0002026	0.0069799	3040.88	1315.8	1869.93	-1.6262	2127.19	1878.6	2142.17	-1.41953	211710_x_at	ribosomal protein L4
KRI1	1.83e-05	0.0010947	152.386	86.9354	84.2514	-1.80871	100.903	100.417	107.342	-1.41963	218798_at	KRI1 homolog (S. cerevisiae)
SREBF2	0.0003528	0.0105811	83.559	63.9288	46.1711	-1.80977	57.695	55.2827	58.853	-1.41979	201247_at	sterol regulatory element binding transcription factor 2
NA	8.84e-05	0.0037008	7.26844	4.6356	4.38496	-1.65758	4.80529	4.7452	5.11876	-1.41996	1556783_a_at	NA
MAP2K5	7.16e-05	0.0031647	66.9802	55.0472	40.0656	-1.67176	49.7124	49.4722	47.1581	-1.42033	204756_at	mitogen-activated protein kinase kinase 5
PDCD11	0.0007572	0.0182298	39.1472	24.2081	25.9268	-1.50991	24.0912	28.4065	27.5605	-1.42041	212422_at	programmed cell death 11
EIF2B5	3e-06	0.0002711	138.25	83.2932	79.6693	-1.7353	83.0348	96.9378	97.3057	-1.42078	212351_at	eukaryotic translation initiation factor 2B, subunit 5 epsilon, 82kDa
MYO1G	0.0006451	0.0162613	1088.33	709.998	533.115	-2.04145	634.895	705.337	765.971	-1.42084	244654_at	myosin IG
RNF216	5.56e-05	0.0025828	78.4566	78.102	64.9298	-1.20833	65.0643	53.4188	55.217	-1.42088	218426_s_at	ring finger protein 216
SNHG12	0.0008131	0.019187	43.8838	25.2489	26.7873	-1.63823	29.7445	30.7584	30.8532	-1.42234	223774_at	small nucleolar RNA host gene 12 (non-protein coding)
WDR74	0.0001919	0.0066914	59.8568	39.9133	38.8646	-1.54014	41.8399	52.445	42.0634	-1.42302	218278_at	WD repeat domain 74
RPS27A	8.8e-06	0.0006281	2242.05	1074.36	1225.95	-1.82883	1606.22	1624	1574.5	-1.42398	200017_at	ribosomal protein S27a
ATP1A1	9e-07	0.0001096	264.248	145.976	133.806	-1.97487	167.48	178.326	185.418	-1.42515	220948_s_at	ATPase, Na+/K+ transporting, alpha 1 polypeptide
BFSP1	0.0009805	0.0220522	8.78069	6.42224	6.91246	-1.27027	6.30592	6.97539	6.16118	-1.42516	206746_at	beaded filament structural protein 1, filensin
FAM38A	2.05e-05	0.0011911	203.64	99.397	101.822	-1.99996	108.4	139.816	142.868	-1.42537	202771_at	family with sequence similarity 38, member A
LOC100132707	0.0009558	0.0216346	35.6557	27.8035	18.9122	-1.88533	27.6025	24.4554	25.0116	-1.42557	1558527_at	hypothetical LOC100132707
GNL1	0.0004786	0.0133439	66.6752	63.1505	47.8115	-1.39454	51.1939	51.5664	46.7655	-1.42574	203307_at	guanine nucleotide binding protein-like 1
FAM113A	0.0008615	0.0200181	10.1215	7.24708	6.60055	-1.53344	6.69909	7.55178	7.09829	-1.42591	231965_at	family with sequence similarity 113, member A
NDUFA9	3.8e-06	0.0003277	291.579	181.198	147.942	-1.9709	182.439	186.562	204.466	-1.42606	208969_at	NADH dehydrogenase (ubiquinone) 1 alpha subcomplex, 9, 39kDa
RPL10	0.0006551	0.0164075	766.647	451.895	449.433	-1.70581	546.201	574.664	537.219	-1.42707	217379_at	ribosomal protein L10
SUPT3H	0.0004593	0.0129444	24.4096	13.1215	13.6183	-1.79241	16.4424	17.6079	17.1045	-1.42708	206506_s_at	suppressor of Ty 3 homolog (S. cerevisiae)
POLG	5.9e-06	0.0004648	101.358	69.8754	63.8393	-1.58771	66.8882	70.2204	71.016	-1.42726	203366_at	polymerase (DNA directed), gamma
ANAPC5	2.4e-06	0.0002294	991.112	643.089	580.406	-1.70762	663.885	652.97	694.317	-1.42746	200098_s_at	anaphase promoting complex subunit 5
SDCCAG3	1e-07	1.75e-05	70.9518	41.1461	42.8766	-1.65479	46.2988	53.5451	49.7024	-1.42753	218427_at	serologically defined colon cancer antigen 3
RPL4	0.0004167	0.0120482	2920.39	1291.77	1825.57	-1.59972	2100.75	1908.81	2045.65	-1.42761	201154_x_at	ribosomal protein L4
ARPC5L	1e-07	1.75e-05	206.112	116.043	102.974	-2.00158	127.786	143.854	144.355	-1.42781	226915_s_at	actin related protein 2/3 complex, subunit 5-like
TIMM22	0.0005671	0.0149408	96.6882	72.2403	54.8657	-1.76227	63.5846	67.8641	67.718	-1.42781	229100_s_at	translocase of inner mitochondrial membrane 22 homolog (yeast)
TRA@	2e-07	3.18e-05	123.414	20.6528	38.3182	-3.22076	63.164	113.066	86.4246	-1.42799	213830_at	T cell receptor alpha locus
NA	0.0006608	0.0164974	83.1707	29.998	38.6695	-2.15081	62.2587	48.4419	58.239	-1.42809	244599_at	NA
C11orf63	5.74e-05	0.0026529	13.9269	8.58533	7.11888	-1.95633	8.73208	10.8748	9.75163	-1.42816	1555787_at	chromosome 11 open reading frame 63
NA	0.0002124	0.007213	7.32699	4.64295	4.3715	-1.67608	4.724	5.37587	5.13032	-1.42817	1566442_at	NA
CD5	1.39e-05	0.0008827	45.3109	23.5267	25.4966	-1.77714	27.0908	28.9898	31.7198	-1.42847	206485_at	CD5 molecule
CDK10	0.0002159	0.0072821	66.0255	48.2818	39.9094	-1.65438	40.0836	41.4064	46.2079	-1.42888	203469_s_at	cyclin-dependent kinase 10
LRRC8C	7.5e-06	0.0005579	22.588	12.8025	12.5148	-1.8049	15.3186	18.4338	15.7972	-1.42988	1558517_s_at	leucine rich repeat containing 8 family, member C
RPL13	1.4e-06	0.0001525	5565.31	3279.87	3274.44	-1.69962	4007.73	3811.38	3890.87	-1.43035	208929_x_at	ribosomal protein L13
CAD	6.1e-06	0.0004751	63.344	34.4055	31.8244	-1.99042	41.0364	42.6441	44.2847	-1.43038	202715_at	carbamoyl-phosphate synthetase 2, aspartate transcarbamylase, and dihydroorotase
PPP1R16B	0.0001019	0.00413	51.1317	24.4807	25.6131	-1.99631	33.6262	40.5935	35.7352	-1.43085	41577_at	protein phosphatase 1, regulatory (inhibitor) subunit 16B
DAZAP1	1.3e-06	0.0001439	420.198	281.895	219.188	-1.91707	260.12	299.511	293.589	-1.43124	226620_x_at	DAZ associated protein 1
CD320	0.0007502	0.0181493	60.0566	41.0818	35.8307	-1.67612	42.352	40.2783	41.9509	-1.43159	218529_at	CD320 molecule
RPL13A	3.8e-06	0.0003277	6584.84	3910.68	3936.42	-1.6728	4660.41	4526.39	4599.43	-1.43166	212790_x_at	ribosomal protein L13a
CC2D1B	0.0001044	0.0042064	29.15	16.6618	17.2903	-1.68591	20.3202	22.0353	20.3483	-1.43255	242487_at	coiled-coil and C2 domain containing 1B
ACBD6	0.0001614	0.005887	52.6314	36.874	35.3493	-1.4889	36.4449	36.717	36.7362	-1.43269	225317_at	acyl-Coenzyme A binding domain containing 6
BAG3	0.0007914	0.0187956	16.5897	8.74323	10.9609	-1.51353	10.1854	10.4056	11.579	-1.43273	217911_s_at	BCL2-associated athanogene 3
REPS1	2.04e-05	0.0011891	24.5966	12.4874	10.6972	-2.29934	17.805	15.9828	17.1659	-1.43287	215201_at	RALBP1 associated Eps domain containing 1
KLRB1	< 1e-07	< 1e-07	133.246	17.9267	52.1052	-2.55724	94.4304	98.6976	92.9845	-1.43299	214470_at	killer cell lectin-like receptor subfamily B, member 1
D4S234E	1.67e-05	0.0010191	21.7295	14.0573	15.4088	-1.4102	14.4863	17.07	15.1629	-1.43307	213533_at	DNA segment on chromosome 4 (unique) 234 expressed sequence
NHP2L1	0.0003071	0.0095024	126.392	74.0384	77.6918	-1.62683	89.0378	89.5679	88.1696	-1.43351	201076_at	NHP2 non-histone chromosome protein 2-like 1 (S. cerevisiae)
RPS25	1.12e-05	0.0007541	1711.45	802.045	995.049	-1.71997	1277.54	1257.34	1193.64	-1.43381	200091_s_at	ribosomal protein S25
FARSB	8.1e-05	0.0034817	153.237	90.7348	88.6838	-1.7279	105.258	112.298	106.746	-1.43553	223035_s_at	phenylalanyl-tRNA synthetase, beta subunit
NUP43	0.0001204	0.0047393	238.397	113.32	101.181	-2.35614	153.037	181.627	165.985	-1.43626	219007_at	nucleoporin 43kDa
NA	0.0003044	0.0094487	10.9144	12.95	9.20981	-1.18508	8.94792	9.9153	7.59903	-1.43628	1564933_at	NA
HEMK1	6.1e-06	0.0004751	65.2814	42.1925	35.8612	-1.82039	44.2667	42.8453	45.4508	-1.43631	52159_at	HemK methyltransferase family member 1
SFI1	0.0006971	0.0171836	80.0017	57.7566	49.9331	-1.60218	58.3601	55.4333	55.6963	-1.43639	215699_x_at	Sfi1 homolog, spindle assembly associated (yeast)
TSR1	0.0001384	0.0052476	33.9494	16.024	17.8462	-1.90233	19.7434	22.1902	23.6335	-1.43649	239042_at	TSR1, 20S rRNA accumulation, homolog (S. cerevisiae)
RPS20	9.93e-05	0.0040547	4078.01	2192.57	2502.53	-1.62955	3017.03	2942.64	2838.01	-1.43693	214003_x_at	ribosomal protein S20
SLC7A6	2.4e-06	0.0002294	155.941	67.4175	72.8446	-2.14073	89.8942	107.33	108.491	-1.43736	203580_s_at	solute carrier family 7 (cationic amino acid transporter, y+ system), member 6
RTTN	2.5e-06	0.0002369	14.5233	7.36691	7.59959	-1.91106	10.1755	9.84258	10.1036	-1.43743	227072_at	rotatin
UTP14A	< 1e-07	< 1e-07	55.1507	29.0284	25.6606	-2.14924	32.9134	38.8249	38.3603	-1.4377	221514_at	UTP14, U3 small nucleolar ribonucleoprotein, homolog A (yeast)
RPL10	2.57e-05	0.0014165	6631.97	3760.12	3775.62	-1.75652	4595.55	4506.71	4612.77	-1.43774	200725_x_at	ribosomal protein L10
CCT7	0.0004511	0.0127925	342.977	219.154	198.696	-1.72614	244.885	259.813	238.539	-1.43782	200812_at	chaperonin containing TCP1, subunit 7 (eta)
EMG1	0.0004257	0.0122436	152.265	82.4207	79.9542	-1.9044	111.734	115.874	105.897	-1.43785	209233_at	EMG1 nucleolar protein homolog (S. cerevisiae)
GALNT11	0.0003777	0.0111384	121.803	77.9295	66.3165	-1.83669	83.3226	85.7314	84.7057	-1.43795	219013_at	UDP-N-acetyl-alpha-D-galactosamine:polypeptide N-acetylgalactosaminyltransferase 11 (GalNAc-T11)
AKAP11	0.0005918	0.0154226	82.6507	46.4879	34.0899	-2.42449	55.37	59.9583	57.4658	-1.43826	215336_at	A kinase (PRKA) anchor protein 11
RRP9	0.0006737	0.0167582	45.1377	31.552	26.5455	-1.70039	32.4	28.1608	31.3758	-1.43862	204133_at	ribosomal RNA processing 9, small subunit (SSU) processome component, homolog (yeast)
C8orf16	0.0008177	0.0192457	42.2122	27.2283	25.5213	-1.654	26.4523	29.1185	29.3421	-1.43862	230702_at	chromosome 8 open reading frame 16
ZBTB25	0.0001454	0.0054525	16.8166	9.76906	10.3653	-1.6224	10.4943	10.7536	11.6886	-1.43871	214482_at	zinc finger and BTB domain containing 25
RPS4P17	3.75e-05	0.0019144	1497.26	737.284	860.853	-1.73927	1130.77	1359.78	1040.1	-1.43953	216342_x_at	ribosomal protein S4X pseudogene 17
NUDCD3	1.3e-06	0.0001439	210.693	135.851	126.352	-1.6675	137.327	148.684	146.341	-1.43974	201270_x_at	NudC domain containing 3
EEF1G	2.77e-05	0.0014965	3788.19	2050.73	2308.16	-1.64122	2790.61	2601.24	2631.09	-1.43978	200689_x_at	eukaryotic translation elongation factor 1 gamma
NA	3.91e-05	0.0019703	8.58311	5.23495	5.13608	-1.67114	5.89406	5.73548	5.95921	-1.44031	243169_at	NA
FASTK	0.0004673	0.0131091	131.579	94.3679	81.2535	-1.61936	93.0231	85.4052	91.3297	-1.4407	210975_x_at	Fas-activated serine/threonine kinase
NA	0.0001468	0.0054899	8.80999	5.73837	5.77212	-1.5263	6.17644	6.27593	6.11435	-1.44087	232823_at	NA
LOC401220	0.0004614	0.0129836	8.577	5.84034	6.89089	-1.24469	6.35163	6.81017	5.94722	-1.44219	1566039_a_at	hypothetical gene supported by BC036933
KIAA1377	7.8e-06	0.0005763	8.43124	4.67238	4.79105	-1.75979	5.08609	6.21575	5.84612	-1.44219	235956_at	KIAA1377
ELP3	< 1e-07	< 1e-07	120.477	51.0851	44.0272	-2.73641	62.7312	75.7013	83.5333	-1.44226	227075_at	elongation protein 3 homolog (S. cerevisiae)
SEPW1	0.0001127	0.0044814	247.377	136.39	146.098	-1.69323	172.945	160.219	171.515	-1.44231	201194_at	selenoprotein W, 1
TMEM134	0.0002923	0.0091742	102.348	62.6027	55.3997	-1.84746	68.1658	70.3137	70.9603	-1.44233	218531_at	transmembrane protein 134
NA	0.0003389	0.0102485	23.2934	12.7387	11.5575	-2.01545	13.8684	14.4915	16.1493	-1.44238	244450_at	NA
ZNF286A	2e-07	3.18e-05	32.1664	10.7948	17.8734	-1.79968	18.1967	22.1381	22.2975	-1.4426	227077_at	zinc finger protein 286A
RPS8	2.32e-05	0.0013131	1528.27	774.04	815.06	-1.87505	1033.9	940.158	1059.21	-1.44284	200858_s_at	ribosomal protein S8
NA	8.63e-05	0.0036464	19.0817	12.5619	12.107	-1.57608	12.962	12.8118	13.2222	-1.44316	244254_at	NA
RDH13	2.96e-05	0.0015804	9.11242	4.60551	4.81838	-1.89118	5.76403	6.59465	6.31416	-1.44317	1559190_s_at	retinol dehydrogenase 13 (all-trans/9-cis)
NA	0.0004988	0.0137362	12.0248	8.02999	6.55198	-1.83529	7.62182	7.33964	8.33182	-1.44323	230850_at	NA
MYO9A	8.48e-05	0.0035969	127.866	77.459	66.7699	-1.91503	84.067	85.3954	88.4931	-1.44493	219027_s_at	myosin IXA
TFB1M	< 1e-07	< 1e-07	66.5347	38.9749	33.1398	-2.0077	40.5337	41.0561	46.0339	-1.44534	228075_x_at	transcription factor B1, mitochondrial
HSD17B7	0.0006892	0.0170353	259.693	165.371	158.411	-1.63936	191.767	161.234	179.653	-1.44552	220081_x_at	hydroxysteroid (17-beta) dehydrogenase 7
TRD@	< 1e-07	< 1e-07	400.981	40.9926	109.319	-3.66799	202.118	282.7	277.305	-1.44599	217143_s_at	T cell receptor delta locus
NA	0.0001482	0.0055196	24.5515	16.807	15.3653	-1.59785	16.6713	18.1931	16.9749	-1.44635	243724_at	NA
NA	0.0006868	0.016999	8.66745	5.26174	6.23569	-1.38997	6.20451	5.61905	5.99216	-1.44646	232934_at	NA
MDN1	1.8e-06	0.0001867	58.9739	23.963	29.2788	-2.01421	36.0883	44.3013	40.7615	-1.4468	212693_at	MDN1, midasin homolog (yeast)
EEF1G	0.0001935	0.0067164	4011.7	2433.06	2449.36	-1.63786	2893.2	2671.38	2772.73	-1.44684	211345_x_at	eukaryotic translation elongation factor 1 gamma
POLR1C	1.5e-06	0.0001618	72.3106	45.7043	40.1963	-1.79894	51.8877	51.9769	49.9628	-1.44729	209317_at	polymerase (RNA) I polypeptide C, 30kDa
FUK	0.0001627	0.0059225	113.409	87.221	63.4693	-1.78683	70.9575	72.5567	78.3492	-1.44748	226072_at	fucokinase
RPL24	7.2e-05	0.0031798	2303.8	1174.94	1471.09	-1.56606	1751.24	1625.33	1591.28	-1.44777	200013_at	ribosomal protein L24
CENPL	0.0001524	0.0056299	7.78851	5.07969	4.71819	-1.65074	5.5398	5.72845	5.37608	-1.44873	1560402_at	centromere protein L
PEX3	6.8e-06	0.0005178	31.5869	18.1096	18.9521	-1.66667	22.4432	24.3827	21.795	-1.44927	203969_at	peroxisomal biogenesis factor 3
TSPAN31	5.05e-05	0.0023802	249.244	170.186	125.211	-1.99059	167.591	163.903	171.827	-1.45056	203227_s_at	tetraspanin 31
RAPH1	3.89e-05	0.0019639	18.6032	9.22082	9.86952	-1.88492	10.7153	12.0236	12.8223	-1.45085	231075_x_at	Ras association (RalGDS/AF-6) and pleckstrin homology domains 1
PPIE	0.0005426	0.014491	78.9914	52.263	47.9977	-1.64573	56.3284	55.5729	54.4334	-1.45116	202494_at	peptidylprolyl isomerase E (cyclophilin E)
UBAP2	0.000155	0.005703	94.6524	53.5235	50.8405	-1.86175	54.2984	67.7692	65.2115	-1.45147	221839_s_at	ubiquitin associated protein 2
NA	1.29e-05	0.0008377	35.395	16.5121	19.1333	-1.84991	21.6938	29.109	24.3825	-1.45165	236458_at	NA
RPL13A	7e-07	8.86e-05	5494.67	2919.23	3098.32	-1.77343	3867.97	3710.6	3783.58	-1.45224	200716_x_at	ribosomal protein L13a
NA	0.0001578	0.0057865	20.5442	14.9019	12.5203	-1.64087	12.4831	15.981	14.1453	-1.45237	239866_at	NA
LPHN1	0.0001208	0.0047448	15.8189	11.5416	9.62914	-1.64282	11.4888	11.998	10.8867	-1.45305	219145_at	latrophilin 1
KIAA0495	1.96e-05	0.0011585	57.9739	35.1738	30.7148	-1.88749	37.4008	45.5605	39.8912	-1.4533	213340_s_at	KIAA0495
FLJ33630	0.000836	0.0195585	13.7524	7.18676	7.2945	-1.88531	9.25331	7.63635	9.46165	-1.45349	228686_at	hypothetical LOC644873
RPL29	3.58e-05	0.0018501	3130.35	1589.53	1876.45	-1.66823	2255.65	2269.07	2153.64	-1.45352	200823_x_at	ribosomal protein L29
ETS1	9.7e-06	0.0006773	28.47	11.9772	14.685	-1.93871	16.8437	19.3087	19.5823	-1.45387	1555355_a_at	v-ets erythroblastosis virus E26 oncogene homolog 1 (avian)
PRPS1	1.78e-05	0.0010706	126.877	47.8248	68.8526	-1.84274	81.1753	92.8693	87.263	-1.45396	209440_at	phosphoribosyl pyrophosphate synthetase 1
RP3-377H14.5	0.0001193	0.0046994	38.9893	19.9127	19.3715	-2.01272	27.0704	31.8472	26.8117	-1.45419	222279_at	hypothetical LOC285830
RPS19	2.7e-05	0.0014689	4481.67	2539.26	2396.22	-1.87031	3074.18	3068.11	3081.86	-1.45421	202649_x_at	ribosomal protein S19
UTP14A	7.2e-06	0.0005422	28.6839	13.884	16.7166	-1.71589	18.0235	17.8508	19.7235	-1.4543	221513_s_at	UTP14, U3 small nucleolar ribonucleoprotein, homolog A (yeast)
MRPL46	1.2e-06	0.0001361	66.8986	40.7551	32.5299	-2.05653	44.3817	44.2949	45.9919	-1.45458	219244_s_at	mitochondrial ribosomal protein L46
CXorf50B	2.9e-06	0.0002651	6.5324	3.75929	3.75066	-1.74167	4.40567	3.97625	4.49048	-1.45472	242292_at	chromosome X open reading frame 50B
PRKCH	2.5e-06	0.0002369	154.986	24.1053	54.3182	-2.85329	67.8533	97.5316	106.534	-1.45479	218764_at	protein kinase C, eta
SUMF2	0.0007095	0.0174155	78	46.5871	48.5835	-1.60548	57.205	56.2977	53.6144	-1.45483	225002_s_at	sulfatase modifying factor 2
JMJD7	0.0001094	0.0043724	188.445	123.004	109.655	-1.71853	124.973	137.631	129.516	-1.45499	60528_at	jumonji domain containing 7
NA	0.0009915	0.0222144	6.57673	4.54243	4.66333	-1.41031	4.81865	4.73745	4.51958	-1.45516	239479_x_at	NA
PRPF19	1.3e-06	0.0001439	136.995	77.0883	67.7411	-2.02233	76.6151	95.4233	94.1438	-1.45517	203103_s_at	PRP19/PSO4 pre-mRNA processing factor 19 homolog (S. cerevisiae)
PPP1R16B	7.66e-05	0.0033239	80.0571	29.9175	39.7753	-2.01273	46.7757	58.2262	55.0099	-1.45532	212750_at	protein phosphatase 1, regulatory (inhibitor) subunit 16B
BNC2	0.0001826	0.0064523	15.443	7.96219	9.40635	-1.64176	10.1741	9.07568	10.6103	-1.45547	220272_at	basonuclin 2
DDX27	6.37e-05	0.0028783	147.893	93.8727	96.7808	-1.52812	90.8817	100.476	101.592	-1.45576	219108_x_at	DEAD (Asp-Glu-Ala-Asp) box polypeptide 27
SMCR7L	0.0006818	0.0169135	177.731	90.932	106.468	-1.66933	129.313	135.852	122.075	-1.45592	221516_s_at	Smith-Magenis syndrome chromosome region, candidate 7-like
LLGL2	0.0007171	0.0175268	18.9683	10.1449	11.6115	-1.63358	13.0316	12.6034	13.0216	-1.45667	1554006_a_at	lethal giant larvae homolog 2 (Drosophila)
NA	4e-07	5.79e-05	15.4286	8.42617	7.74359	-1.99244	10.2835	10.281	10.5879	-1.45719	241489_at	NA
SPG7	5.11e-05	0.0024023	254.811	194.65	170.593	-1.49368	181.424	169.279	174.85	-1.45731	214494_s_at	spastic paraplegia 7 (pure and complicated autosomal recessive)
NA	0.0005073	0.0138822	6.14414	3.9518	3.99625	-1.53748	4.38537	4.20547	4.21559	-1.45748	215626_at	NA
FAM85A	0.000985	0.022117	10.6854	8.7792	8.13826	-1.31298	7.32919	7.19735	7.33103	-1.45756	238716_at	family with sequence similarity 85, member A
TRPV2	0.0001512	0.0055971	190.656	123.976	101.546	-1.87754	119.27	137.02	130.804	-1.45757	219282_s_at	transient receptor potential cation channel, subfamily V, member 2
FLAD1	0.0009605	0.0217095	91.9566	64.9472	56.7286	-1.62099	62.9818	62.3704	63.0704	-1.458	212541_at	FAD1 flavin adenine dinucleotide synthetase homolog (S. cerevisiae)
RPL19	8.76e-05	0.0036814	5708.09	3007.15	3433.5	-1.66247	3931.03	4037.31	3914.63	-1.45815	200029_at	ribosomal protein L19
B3GALT6	0.0001766	0.0062985	95.9335	63.681	49.6892	-1.93067	63.4769	67.6201	65.7657	-1.45872	225733_at	UDP-Gal:betaGal beta 1,3-galactosyltransferase polypeptide 6
HELB	0.0005868	0.0153215	35.0544	26.2811	20.5863	-1.7028	22.3281	25.3801	24.0142	-1.45974	1570200_at	helicase (DNA) B
RABL2B	0.0006644	0.0165721	38.3132	17.8909	17.0657	-2.24504	19.3347	29.0059	26.2442	-1.45988	219151_s_at	RAB, member of RAS oncogene family-like 2B
NA	0.0005329	0.0143246	11.391	8.65636	6.59935	-1.72608	7.2756	7.86629	7.80099	-1.4602	230818_at	NA
NA	0.0005736	0.0150514	20.0486	14.8836	15.3593	-1.30531	15.4136	16.1036	13.7208	-1.46118	237404_at	NA
SOX8	0.0001912	0.0066755	8.58456	5.38843	6.19615	-1.38547	5.89674	5.90368	5.87283	-1.46174	226913_s_at	SRY (sex determining region Y)-box 8
SF3A3	0.0003999	0.0116735	148.736	93.7009	80.651	-1.8442	89.1436	121.633	101.742	-1.4619	203818_s_at	splicing factor 3a, subunit 3, 60kDa
RPL18	9.72e-05	0.0039958	5379.82	3094.03	2977.68	-1.80671	3717.03	3575.27	3679.94	-1.46193	200022_at	ribosomal protein L18
ALKBH8	0.0001389	0.0052483	30.9229	19.2293	16.6242	-1.86012	18.5801	18.3589	21.1477	-1.46223	235713_at	alkB, alkylation repair homolog 8 (E. coli)
NA	2.14e-05	0.0012303	28.1932	19.2014	17.5136	-1.60979	18.9786	19.3448	19.2807	-1.46225	230948_at	NA
NA	0.0001528	0.0056334	7.44464	4.65811	4.82008	-1.54451	5.26984	4.78626	5.09088	-1.46235	1560763_at	NA
BOLA1	0.000119	0.0046909	27.403	16.6446	14.3521	-1.90934	18.5091	19.6624	18.7343	-1.46272	219345_at	bolA homolog 1 (E. coli)
KLRD1	0.0001342	0.005131	47.6259	10.7745	20.8121	-2.28838	26.3101	37.286	32.5518	-1.46308	207795_s_at	killer cell lectin-like receptor subfamily D, member 1
UNC84B	1.5e-06	0.0001618	394.121	265.383	235.083	-1.67652	238.615	256.225	269.33	-1.46334	212144_at	unc-84 homolog B (C. elegans)
G3BP1	1.3e-05	0.0008412	346.359	135.499	157.384	-2.20073	238.268	242.095	236.68	-1.4634	225007_at	GTPase activating protein (SH3 domain) binding protein 1
NA	0.0003076	0.0095125	32.3254	12.678	15.6755	-2.06216	22.3767	21.9448	22.0859	-1.46362	225856_at	NA
C9orf114	0.0002611	0.0084024	55.1777	35.2808	29.0556	-1.89904	33.9177	34.2036	37.6808	-1.46435	218565_at	chromosome 9 open reading frame 114
PBX4	0.0003265	0.0099728	49.4903	27.2645	25.5949	-1.9336	28.9591	25.5518	33.7836	-1.46492	230536_at	pre-B-cell leukemia homeobox 4
NDUFB8	0.0004194	0.012107	675.419	472.515	435.604	-1.55054	501.952	446.841	461.015	-1.46507	201226_at	NADH dehydrogenase (ubiquinone) 1 beta subcomplex, 8, 19kDa
NA	0.0005626	0.0148672	11.1488	7.45606	6.66581	-1.67254	6.98749	7.59014	7.60717	-1.46557	1563147_at	NA
NOL9	1.17e-05	0.0007754	128.128	56.9279	58.0446	-2.20741	73.5894	88.2478	87.3561	-1.46673	218754_at	nucleolar protein 9
PORCN	0.0007274	0.0177468	56.4147	40.2094	35.7138	-1.57963	40.4887	42.4901	38.4549	-1.46704	219483_s_at	porcupine homolog (Drosophila)
SERBP1	0.0002931	0.0091888	72.2867	49.9749	47.4675	-1.52287	59.1417	54.7501	49.2691	-1.46718	228129_at	SERPINE1 mRNA binding protein 1
RPL13	2.91e-05	0.0015583	3196.23	1800.54	1803.87	-1.77188	2319.35	2208.06	2178.29	-1.46731	212933_x_at	ribosomal protein L13
KIR2DL2	0.0009571	0.0216506	46.4321	22.7214	26.3205	-1.7641	31.1791	32.3176	31.6217	-1.46836	211397_x_at	killer cell immunoglobulin-like receptor, two domains, long cytoplasmic tail, 2
HIRIP3	8.65e-05	0.003652	53.8744	37.0043	31.7225	-1.6983	35.8158	32.0141	36.6881	-1.46844	204504_s_at	HIRA interacting protein 3
NA	1.87e-05	0.001115	64.3964	32.0705	23.9193	-2.69223	48.346	43.1439	43.8501	-1.46856	232363_at	NA
MLLT3	0.0001931	0.0067119	49.5019	27.9953	29.3024	-1.68935	33.9009	34.9902	33.6976	-1.469	204917_s_at	myeloid/lymphoid or mixed-lineage leukemia (trithorax homolog, Drosophila); translocated to, 3
WHSC2	0.0006146	0.015737	67.7129	46.2063	40.9758	-1.65251	42.8285	49.2507	46.0918	-1.46909	203112_s_at	Wolf-Hirschhorn syndrome candidate 2
NDUFS3	0.0001224	0.004787	264.829	165.801	161.802	-1.63674	197.194	177.289	180.249	-1.46924	201740_at	NADH dehydrogenase (ubiquinone) Fe-S protein 3, 30kDa (NADH-coenzyme Q reductase)
NCAM1	1.03e-05	0.0007093	69.6149	16.0866	23.435	-2.97056	47.2816	48.5564	47.3816	-1.46924	212843_at	neural cell adhesion molecule 1
CCDC84	0.000206	0.0070748	137.504	78.0698	81.4982	-1.6872	96.6464	100.562	93.5842	-1.4693	227208_at	coiled-coil domain containing 84
IL21R	7.95e-05	0.0034361	78.3056	31.3568	32.6078	-2.40144	43.9862	48.6129	53.2913	-1.46939	221658_s_at	interleukin 21 receptor
NUCKS1	1.28e-05	0.0008341	62.6904	25.9767	26.4897	-2.3666	40.5417	49.49	42.6562	-1.46966	226880_at	nuclear casein kinase and cyclin-dependent kinase substrate 1
RPL13P12	4e-06	0.0003423	5566.52	2827.59	2968.78	-1.87502	3914.21	3492.4	3787.59	-1.46967	212191_x_at	ribosomal protein L13 pseudogene 12
NFATC2IP	2.4e-06	0.0002294	360.027	177.382	195.658	-1.84009	235.806	269.037	244.938	-1.46987	217526_at	nuclear factor of activated T-cells, cytoplasmic, calcineurin-dependent 2 interacting protein
HTT	2.05e-05	0.0011911	86.0118	53.1214	50.6421	-1.69842	56.7585	62.9647	58.5163	-1.46988	202390_s_at	huntingtin
HSP90AB1	0.0005654	0.0149051	552.049	224.22	316.573	-1.74383	345.048	381.32	375.492	-1.4702	200064_at	heat shock protein 90kDa alpha (cytosolic), class B member 1
FAM58A	0.0007319	0.0178113	107.376	69.014	61.8867	-1.73505	83.7993	75.2663	73.008	-1.47075	226466_s_at	family with sequence similarity 58, member A
RPS3	1.7e-05	0.0010316	4744.57	2639.01	2693.31	-1.76161	3322.96	3198.39	3225.53	-1.47094	208692_at	ribosomal protein S3
RPL6	0.0001641	0.0059576	2288.19	1003.71	1363.81	-1.6778	1641.33	1528.16	1555.49	-1.47104	200034_s_at	ribosomal protein L6
PUS1	0.0001237	0.0048137	38.6922	18.8268	21.3939	-1.80856	22.7428	27.0363	26.2977	-1.47132	218670_at	pseudouridylate synthase 1
GCN1L1	0.0001881	0.0065925	55.8863	30.8775	33.8047	-1.65321	33.4183	35.5871	37.9717	-1.47179	216232_s_at	GCN1 general control of amino-acid synthesis 1-like 1 (yeast)
GPA33	4.63e-05	0.0022343	34.0869	19.9283	18.6824	-1.82454	20.4996	19.4251	23.1594	-1.47184	205929_at	glycoprotein A33 (transmembrane)
NR3C2	2.48e-05	0.0013794	13.1228	7.38008	7.84991	-1.67171	8.93421	9.28011	8.91505	-1.47198	205259_at	nuclear receptor subfamily 3, group C, member 2
TYSND1	2e-05	0.0011745	41.4254	26.4967	24.0481	-1.72261	27.9014	27.4126	28.1419	-1.47202	225877_at	trypsin domain containing 1
LOC150759	0.0006143	0.015737	13.6154	6.26436	7.55459	-1.80226	7.91242	7.93809	9.24805	-1.47224	213703_at	hypothetical protein LOC150759
MTMR15	0.0002329	0.0077081	29.7689	16.8182	16.5152	-1.80252	16.9423	23.2029	20.2131	-1.47276	203678_at	myotubularin related protein 15
NA	5.11e-05	0.0024023	17.3783	11.248	8.86794	-1.95968	11.3521	11.8504	11.7933	-1.47357	1563104_at	NA
FOXP1	2e-07	3.18e-05	532.515	320.194	303.269	-1.75592	346.212	379.321	361.339	-1.47373	224837_at	forkhead box P1
ATP13A1	0.0003314	0.0100637	187.859	117.088	101.529	-1.8503	115.162	130.984	127.448	-1.474	218052_s_at	ATPase type 13A1
LGR6	6.08e-05	0.0027702	22.8085	9.88768	13.1059	-1.74032	15.3756	14.3857	15.4675	-1.47461	227819_at	leucine-rich repeat-containing G protein-coupled receptor 6
NA	0.0002341	0.0077338	24.3455	15.3972	15.3882	-1.58209	17.1127	18.3362	16.5037	-1.47515	238806_at	NA
CENPL	0.0001847	0.0065109	70.5828	26.7521	31.5465	-2.23742	40.4334	54.6317	47.8359	-1.47552	227517_s_at	centromere protein L
LOC100131731	8.1e-06	0.0005929	88.3142	53.2599	45.0028	-1.96242	50.8253	53.9435	59.8447	-1.47572	1557263_s_at	hypothetical protein LOC100131731
DHX30	0.0001691	0.0060982	83.6149	53.1093	46.5319	-1.79694	53.8429	56.7511	56.6598	-1.47574	212674_s_at	DEAH (Asp-Glu-Ala-His) box polypeptide 30
COQ10A	2.86e-05	0.0015376	44.9392	22.6939	23.6038	-1.9039	26.8012	32.9604	30.442	-1.47622	225747_at	coenzyme Q10 homolog A (S. cerevisiae)
SGSM2	5e-07	6.78e-05	331.917	222.997	202.997	-1.63508	205.593	232.354	224.837	-1.47625	36129_at	small G protein signaling modulator 2
FAM134B	0.0001573	0.0057757	71.4586	40.1775	35.7402	-1.99939	48.2167	48.9139	48.4016	-1.47637	218510_x_at	family with sequence similarity 134, member B
TRUB2	4.12e-05	0.0020553	88.2662	55.776	50.2568	-1.7563	54.4491	57.1432	59.7499	-1.47726	223109_at	TruB pseudouridine (psi) synthase homolog 2 (E. coli)
MTG1	0.0002411	0.0078982	85.3859	50.5538	44.2278	-1.93059	56.2767	59.8064	57.7307	-1.47904	212767_at	mitochondrial GTPase 1 homolog (S. cerevisiae)
SNRPN	0.000136	0.0051817	12.2134	5.38137	6.0043	-2.03411	8.51523	9.48406	8.25713	-1.47913	228370_at	small nuclear ribonucleoprotein polypeptide N
FAM178A	3.1e-06	0.0002779	87.0808	47.3313	41.8681	-2.07988	49.9631	68.4123	58.8658	-1.47931	203482_at	family with sequence similarity 178, member A
SRRT	7.5e-06	0.0005579	440.4	283.437	242.486	-1.81619	260.663	291.969	297.656	-1.47956	201680_x_at	serrate RNA effector molecule homolog (Arabidopsis)
TMEM177	< 1e-07	< 1e-07	10.6633	6.0789	5.84054	-1.82574	6.48766	6.42165	7.20679	-1.47962	218897_at	transmembrane protein 177
LOC641518	0.0001322	0.0050759	6.84583	4.57915	4.78692	-1.43011	4.89153	4.44998	4.62537	-1.48006	243363_at	hypothetical protein LOC641518
OGFOD1	4e-07	5.79e-05	120.164	56.773	59.6072	-2.01593	73.9468	85.9742	81.1777	-1.48026	225110_at	2-oxoglutarate and iron-dependent oxygenase domain containing 1
NA	5e-05	0.0023587	23.3331	10.0111	9.83146	-2.37331	15.7899	16.3378	15.7611	-1.48042	243808_at	NA
C1orf21	0.0008653	0.0200676	14.7731	9.19283	8.20277	-1.80099	9.72161	10.5556	9.97737	-1.48066	223126_s_at	chromosome 1 open reading frame 21
NA	0.0008584	0.01998	19.0759	12.0614	13.0563	-1.46105	14.3294	12.715	12.8822	-1.4808	243626_at	NA
FBF1	3.09e-05	0.0016355	38.494	23.5841	25.0206	-1.53849	23.8231	23.8085	25.9928	-1.48095	1555288_s_at	Fas (TNFRSF6) binding factor 1
AARS	2.7e-06	0.0002515	150.836	85.7393	84.0281	-1.79507	92.9595	103.508	101.833	-1.48121	201000_at	alanyl-tRNA synthetase
C9orf142	2.6e-06	0.0002443	104.256	53.9797	50.2547	-2.07456	62.273	59.8942	70.3769	-1.4814	226070_at	chromosome 9 open reading frame 142
TMEM173	0.0006309	0.0160141	344.537	192.674	171.971	-2.00347	192.655	241.698	232.545	-1.48159	224929_at	transmembrane protein 173
HIC2	0.0009311	0.0212205	29.0183	14.3094	15.5379	-1.86758	17.7659	20.7674	19.5802	-1.48202	212964_at	hypermethylated in cancer 2
SRRT	5e-07	6.78e-05	347.338	216.486	186.219	-1.86522	190.523	224.693	234.339	-1.4822	222047_s_at	serrate RNA effector molecule homolog (Arabidopsis)
NA	0.000212	0.0072084	14.6101	8.53029	8.22704	-1.77586	9.70054	10.1154	9.85346	-1.48274	241434_at	NA
ALDH18A1	4.7e-06	0.0003905	16.3117	8.29134	8.02486	-2.03265	9.37396	10.5894	11.0006	-1.48281	222416_at	aldehyde dehydrogenase 18 family, member A1
LUC7L	4.1e-06	0.0003475	88.097	49.4168	51.1366	-1.72278	49.9505	50.388	59.3716	-1.48382	220143_x_at	LUC7-like (S. cerevisiae)
NA	0.0009386	0.0213292	25.4007	15.8481	15.0812	-1.68426	16.6891	17.3044	17.1181	-1.48385	243715_at	NA
TMEM50B	0.000242	0.0079168	165.937	84.7185	95.8082	-1.73198	103.722	125.482	111.817	-1.48401	228001_at	transmembrane protein 50B
LOC100129637	0.0003004	0.0093533	26.5087	12.4311	13.2439	-2.00157	14.2188	17.1553	17.8589	-1.48434	234738_s_at	hypothetical LOC100129637
SEMA4F	2.1e-05	0.0012112	49.7605	30.9559	31.6108	-1.57416	32.2993	36.4026	33.5225	-1.48439	210124_x_at	sema domain, immunoglobulin domain (Ig), transmembrane domain (TM) and short cytoplasmic domain, (semaphorin) 4F
RPLP0P6	0.0003468	0.0104306	1318.51	496.452	699.408	-1.88518	924.238	859.652	888.196	-1.48448	214167_s_at	ribosomal protein, large, P0 pseudogene 6
LOC284440	0.0005673	0.0149408	10.7031	7.36809	6.3314	-1.69047	7.11647	6.61273	7.20844	-1.4848	1569318_at	hypothetical LOC284440
NA	3.33e-05	0.0017423	6.12995	3.74556	3.81295	-1.60766	4.4825	4.14902	4.12799	-1.48497	237216_at	NA
FAM98B	0.0001653	0.0059853	23.9351	12.8964	11.9418	-2.00432	14.964	14.8444	16.1164	-1.48514	1564637_a_at	family with sequence similarity 98, member B
SENP3	0.000732	0.0178113	34.5062	25.5195	20.251	-1.70393	20.8318	24.6384	23.2237	-1.48582	215114_at	SUMO1/sentrin/SMT3 specific peptidase 3
RPL24	0.0007426	0.0179972	2467.78	1359.82	1412.38	-1.74725	1823.28	1726.78	1659.98	-1.48664	214143_x_at	ribosomal protein L24
PRKCQ	0.0003158	0.0097416	44.2762	16.7048	21.6091	-2.04896	25.0675	28.024	29.763	-1.48763	210039_s_at	protein kinase C, theta
DIS3L2	2.12e-05	0.0012201	28.2497	15.6646	13.6996	-2.06209	19.1596	17.6119	18.9849	-1.48801	238602_at	DIS3 mitotic control homolog (S. cerevisiae)-like 2
PDCD11	4.8e-06	0.000397	117.844	80.5583	65.7145	-1.79327	73.8272	71.2157	79.1791	-1.48832	212424_at	programmed cell death 11
LTBP3	2.61e-05	0.0014327	69.946	40.6234	41.8172	-1.67266	43.9646	38.5787	46.9868	-1.48863	227308_x_at	latent transforming growth factor beta binding protein 3
NA	0.0002109	0.0071844	63.7468	41.0983	34.9435	-1.82428	41.0295	44.8364	42.8166	-1.48883	238652_at	NA
LOC100134934	0.0003613	0.0108064	73.6844	66.7276	55.8103	-1.32027	57.897	46.8721	49.4827	-1.4891	226396_at	hypothetical protein LOC100134934
RWDD2B	0.0005146	0.0140185	63.8469	41.4363	35.7231	-1.78727	43.9079	50.6473	42.8686	-1.48936	218377_s_at	RWD domain containing 2B
NA	0.0003672	0.0109172	51.7126	25.5747	26.4416	-1.95573	33.0835	38.0883	34.72	-1.48942	1558154_at	NA
LAS1L	0.0001331	0.0050997	108.328	65.697	58.0553	-1.86595	68.5638	77.956	72.6968	-1.49014	208117_s_at	LAS1-like (S. cerevisiae)
NA	0.0003757	0.0111035	18.8515	13.2522	8.92224	-2.11286	12.2217	17.0489	12.65	-1.49024	234041_at	NA
NA	0.0003646	0.0108724	69.5878	42.7299	32.2793	-2.1558	36.3607	36.34	46.6885	-1.49047	243210_at	NA
MUTYH	5e-06	0.0004099	60.9199	34.452	35.2353	-1.72895	34.9515	45.7407	40.8705	-1.49056	207727_s_at	mutY homolog (E. coli)
ZSCAN2	0.0008386	0.0196026	37.0684	22.3274	20.3406	-1.82238	27.4799	24.7162	24.8671	-1.49066	231188_at	zinc finger and SCAN domain containing 2
USP22	0.0001355	0.0051699	20.0278	10.5407	11.4312	-1.75203	13.474	10.9452	13.4316	-1.4911	216957_at	ubiquitin specific peptidase 22
C11orf1	0.0007284	0.0177602	24.4433	10.3816	12.8363	-1.90423	16.031	18.3846	16.3928	-1.4911	231530_s_at	chromosome 11 open reading frame 1
TMEM18	9.07e-05	0.0037683	66.0027	37.2052	38.3905	-1.71924	46.1341	42.5057	44.2641	-1.49111	225489_at	transmembrane protein 18
NA	9.19e-05	0.0038094	10.9779	4.40278	4.5202	-2.42863	5.59945	5.93753	7.3587	-1.49183	241060_x_at	NA
C11orf1	2.89e-05	0.0015506	21.4718	8.09939	11.6398	-1.84469	15.9425	13.8323	14.3911	-1.49202	222785_x_at	chromosome 11 open reading frame 1
BFAR	0.0002461	0.0080188	308.079	194.953	151.737	-2.03035	203.712	199.125	206.444	-1.49232	218056_at	bifunctional apoptosis regulator
PLXDC1	7.7e-06	0.0005697	15.0638	7.77174	8.24816	-1.82632	9.05923	10.6383	10.0933	-1.49245	214081_at	plexin domain containing 1
ZNF32	8.19e-05	0.0035121	45.173	20.567	24.4476	-1.84775	30.2597	31.218	30.2483	-1.49341	209538_at	zinc finger protein 32
CAMK2N1	4.32e-05	0.0021279	9.64004	6.61577	5.74029	-1.67936	7.07296	6.76823	6.45349	-1.49377	218309_at	calcium/calmodulin-dependent protein kinase II inhibitor 1
MATR3	0.0002953	0.0092313	30.9416	15.5581	13.6264	-2.27071	20.0578	23.3967	20.7105	-1.49401	242260_at	matrin 3
FCHSD1	0.0002215	0.0074195	81.7533	88.1661	66.7613	-1.22456	57.8062	52.9707	54.7128	-1.49423	226698_at	FCH and double SH3 domains 1
KCNAB1	0.0008774	0.0202755	26.4747	15.5833	14.972	-1.76828	17.6908	17.8732	17.7153	-1.49445	210078_s_at	potassium voltage-gated channel, shaker-related subfamily, beta member 1
SUSD4	1.2e-06	0.0001361	12.7709	6.74535	7.66333	-1.6665	8.49998	8.56496	8.5389	-1.49562	219389_at	sushi domain containing 4
INTS5	0.0003236	0.0099009	193.068	142.99	108.516	-1.77916	121.676	132.494	129.086	-1.49565	53968_at	integrator complex subunit 5
APRT	0.0002418	0.0079164	535.605	322.652	254.83	-2.10181	340.842	343.1	357.917	-1.49645	213892_s_at	adenine phosphoribosyltransferase
BXDC1	0.000262	0.0084115	34.6639	18.1121	21.0379	-1.64769	23.9031	27.791	23.1616	-1.49661	225866_at	brix domain containing 1
PNMA3	0.0002501	0.0081201	43.3386	23.3363	25.1448	-1.72356	24.1643	26.9155	28.9497	-1.49703	223621_at	paraneoplastic antigen MA3
CCT3	1e-06	0.0001186	508.539	269.352	241.923	-2.10207	291.614	332.687	339.691	-1.49706	200910_at	chaperonin containing TCP1, subunit 3 (gamma)
TRIM68	4.36e-05	0.002136	47.633	19.814	25.7377	-1.85071	25.1183	35.6464	31.8157	-1.49715	219405_at	tripartite motif-containing 68
DDX56	1.53e-05	0.0009474	126.618	72.9841	70.1972	-1.80375	80.3277	89.3772	84.5447	-1.49765	217754_at	DEAD (Asp-Glu-Ala-Asp) box polypeptide 56
GALT	4.18e-05	0.0020776	74.5421	45.0133	41.6866	-1.78815	48.5992	50.9692	49.7722	-1.49766	203179_at	galactose-1-phosphate uridylyltransferase
ZNF783	< 1e-07	< 1e-07	98.3388	57.2858	54.0571	-1.81917	67.6497	72.2228	65.6595	-1.49771	78495_at	zinc finger family member 783
CARD11	1.6e-06	0.0001712	101.278	58.4891	58.8945	-1.71964	63.5102	68.2624	67.5885	-1.49845	223514_at	caspase recruitment domain family, member 11
NA	0.0003045	0.0094487	20.8282	12.3284	11.3076	-1.84196	16.2595	14.0356	13.8914	-1.49936	217347_at	NA
R3HCC1	6.96e-05	0.0030932	228.165	178.798	155.237	-1.46978	161.153	159.634	152.154	-1.49956	35156_at	R3H domain and coiled-coil containing 1
C21orf49	0.0002377	0.0078102	21.176	16.1375	13.4806	-1.57085	15.2001	15.6576	14.1179	-1.49994	1557782_s_at	chromosome 21 open reading frame 49
NPDC1	0.0006093	0.0156574	50.2821	26.1551	26.1743	-1.92105	33.3241	35.4387	33.516	-1.50024	218086_at	neural proliferation, differentiation and control, 1
AMMECR1	0.0002774	0.0088128	157.922	66.1508	65.2897	-2.41879	104.695	109.755	105.263	-1.50026	204976_s_at	Alport syndrome, mental retardation, midface hypoplasia and elliptocytosis chromosomal region gene 1
JRK	0.0002243	0.0074915	265.382	199.934	164.236	-1.61585	184.35	181.782	176.795	-1.50107	216309_x_at	jerky homolog (mouse)
ICOS	4.78e-05	0.0022885	13.2787	7.16039	7.37346	-1.80088	9.64769	8.2794	8.84559	-1.50117	210439_at	inducible T-cell co-stimulator
EEF2K	0.0003843	0.0113026	77.8449	43.3394	51.6977	-1.50577	53.1147	61.7952	51.8509	-1.50132	225546_at	eukaryotic elongation factor-2 kinase
GNB1L	4.85e-05	0.0023099	68.4876	48.1243	38.636	-1.77264	46.9307	52.9841	45.6107	-1.50157	226204_at	guanine nucleotide binding protein (G protein), beta polypeptide 1-like
ALKBH3	8.4e-06	0.0006107	44.366	20.1027	23.9007	-1.85626	31.502	29.9067	29.5382	-1.50199	226127_at	alkB, alkylation repair homolog 3 (E. coli)
HEG1	0.0001823	0.0064471	72.3602	42.1271	39.9279	-1.81227	49.5912	55.8468	48.1731	-1.50209	212822_at	HEG homolog 1 (zebrafish)
NDUFB8	0.0005091	0.013923	1316.65	976.91	731.521	-1.79988	901.185	854.023	876.343	-1.50244	201227_s_at	NADH dehydrogenase (ubiquinone) 1 beta subcomplex, 8, 19kDa
PHB	0.0007728	0.0185144	82.2236	64.6192	53.445	-1.53847	57.0572	59.8303	54.7228	-1.50255	200659_s_at	prohibitin
DTYMK	2.18e-05	0.0012442	94.7022	54.857	51.1739	-1.8506	58.5616	61.133	63.0181	-1.50278	1553984_s_at	deoxythymidylate kinase (thymidylate kinase)
EXOSC2	1.32e-05	0.0008491	38.5201	21.3987	18.3502	-2.09916	26.1782	21.3818	25.6326	-1.50278	209527_at	exosome component 2
ULK3	1.4e-05	0.000887	129.599	72.5923	69.3404	-1.86903	85.7934	86.4054	86.1838	-1.50375	225067_at	unc-51-like kinase 3 (C. elegans)
CBX6	0.0004338	0.0123983	7.80971	5.42203	5.52549	-1.4134	5.75083	5.85697	5.19182	-1.50423	213040_s_at	chromobox homolog 6
SSRP1	1.1e-06	0.0001266	148.574	76.8643	68.9968	-2.15334	86.1116	108.474	98.7049	-1.50523	200957_s_at	structure specific recognition protein 1
ASB1	0.0001407	0.0052981	8.92826	7.05896	5.6952	-1.56768	6.14995	5.48176	5.92879	-1.50592	212819_at	ankyrin repeat and SOCS box-containing 1
KLRD1	4.95e-05	0.0023452	125.559	21.2952	50.2928	-2.49656	69.4256	92.7209	83.3224	-1.50691	210606_x_at	killer cell lectin-like receptor subfamily D, member 1
RPS20	3.96e-05	0.0019864	3399.64	1706.14	1934.64	-1.75725	2479.66	2395.72	2255.99	-1.50694	200949_x_at	ribosomal protein S20
NA	0.0006372	0.0161142	12.7523	10.8766	9.94074	-1.28284	9.40235	8.73414	8.46199	-1.50701	234552_at	NA
NA	0.0005885	0.0153513	13.0628	10.436	9.10659	-1.43444	10.1871	10.2283	8.66442	-1.50764	1557413_a_at	NA
NA	0.0003641	0.0108723	22.5435	16.8641	11.9421	-1.88774	13.4353	16.6886	14.9457	-1.50836	241988_x_at	NA
CLSTN1	< 1e-07	< 1e-07	165.682	76.1946	81.3217	-2.03737	88.439	96.5535	109.836	-1.50846	201561_s_at	calsyntenin 1
TRAT1	7.75e-05	0.0033576	8.45182	3.47318	5.28529	-1.59912	6.04366	5.47978	5.60218	-1.50867	217147_s_at	T cell receptor associated transmembrane adaptor 1
TTC39C	0.0009444	0.0214321	32.9491	20.1052	17.7677	-1.85444	19.647	21.3582	21.8283	-1.50946	1552307_a_at	tetratricopeptide repeat domain 39C
HYOU1	0.0005044	0.0138305	151.171	86.9204	80.2713	-1.88325	95.2971	120.892	100.143	-1.50955	200825_s_at	hypoxia up-regulated 1
LCMT1	1.8e-06	0.0001867	233.499	152.524	131.323	-1.77805	157.025	147.442	154.606	-1.51029	221515_s_at	leucine carboxyl methyltransferase 1
NA	0.0007029	0.0172773	14.9991	9.40158	7.06431	-2.12322	8.56914	10.6479	9.92982	-1.51051	242836_at	NA
NA	0.0008985	0.0206173	18.9912	12.3188	10.7069	-1.77373	11.9104	13.1725	12.5674	-1.51114	216170_at	NA
LOC100131096	0.0001169	0.0046221	85.0776	42.7999	47.5399	-1.7896	43.4327	55.2134	56.2964	-1.51124	230526_at	hypothetical LOC100131096
C17orf66	1e-07	1.75e-05	7.89952	4.99851	5.50427	-1.43516	5.4063	5.59388	5.22636	-1.51148	1553378_a_at	chromosome 17 open reading frame 66
38601	2.03e-05	0.0011858	47.4867	16.5688	21.8942	-2.16891	28.3049	32.7585	31.399	-1.51237	212413_at	septin 6
DMPK	0.000161	0.0058763	22.873	19.0895	13.7143	-1.66782	14.144	16.0539	15.1088	-1.51389	37996_s_at	dystrophia myotonica-protein kinase
NA	2.6e-05	0.0014287	9.58212	5.51346	5.32997	-1.79778	6.31542	6.82408	6.32929	-1.51393	1560391_at	NA
RPLP0	0.0002519	0.008164	3215.92	1627.86	1665.67	-1.93071	2247.75	2088.45	2123.7	-1.5143	208856_x_at	ribosomal protein, large, P0
NFATC2IP	7.41e-05	0.0032411	499.57	286.775	253.785	-1.96848	311.439	335.142	329.845	-1.51456	217527_s_at	nuclear factor of activated T-cells, cytoplasmic, calcineurin-dependent 2 interacting protein
LRPPRC	6.94e-05	0.0030899	114.839	51.5286	48.2573	-2.37972	70.7379	80.3161	75.8172	-1.51468	211615_s_at	leucine-rich PPR-motif containing
DCHS1	0.0001828	0.0064523	15.3419	10.755	10.2485	-1.49698	9.46825	11.7932	10.1287	-1.51469	222101_s_at	dachsous 1 (Drosophila)
NA	0.000931	0.0212205	56.0239	34.7504	24.8393	-2.25546	33.5427	36.5342	36.981	-1.51494	236072_at	NA
GLMN	0.0002276	0.0075602	13.1163	6.37677	7.15196	-1.83395	10.0806	9.95719	8.65499	-1.51547	236924_at	glomulin, FKBP associated protein
TSHZ2	5e-07	6.78e-05	7.27607	4.82563	4.84433	-1.50197	4.63485	4.80439	4.79979	-1.51591	238577_s_at	teashirt zinc finger homeobox 2
ETS1	2.19e-05	0.0012486	245.116	33.9827	79.5889	-3.07978	123.045	154.028	161.673	-1.51612	224833_at	v-ets erythroblastosis virus E26 oncogene homolog 1 (avian)
NA	0.0005683	0.0149527	43.6409	28.0413	19.8302	-2.20073	36.0282	32.0518	28.7823	-1.51624	215586_at	NA
TTC3	3.36e-05	0.0017546	153.092	58.6405	62.8259	-2.43677	86.5198	114.852	100.909	-1.51713	208073_x_at	tetratricopeptide repeat domain 3
EBP	3.4e-05	0.0017721	105.198	71.6272	59.585	-1.76551	72.6583	69.9506	69.3377	-1.51718	202735_at	emopamil binding protein (sterol isomerase)
MGC52282	0.0001883	0.0065953	28.3128	20.184	16.5163	-1.71423	17.253	21.1419	18.6602	-1.51728	231638_at	transmembrane protease, serine pseudogene
KLHDC4	1.2e-06	0.0001361	108.01	35.6701	46.4033	-2.32764	56.3578	81.5852	71.1829	-1.51736	232171_x_at	kelch domain containing 4
NA	0.0009527	0.0215868	129.82	104.207	76.3513	-1.7003	91.4537	86.4914	85.5522	-1.51744	238666_at	NA
tcag7.1196	8.52e-05	0.0036111	33.9614	21.091	20.4357	-1.66187	22.6345	23.8896	22.3755	-1.5178	225907_at	similar to GLI-Kruppel family member HKR1
NME3	0.0002172	0.0073079	183.802	121.679	105.908	-1.73549	121.862	117.942	121.061	-1.51827	204862_s_at	non-metastatic cells 3, protein expressed in
NA	0.0006757	0.0168003	20.121	12.1167	12.1631	-1.65427	11.9614	12.8623	13.246	-1.51903	238573_at	NA
RLTPR	3.24e-05	0.0017001	42.7396	23.096	24.9436	-1.71345	26.2625	27.7408	28.1333	-1.51918	227216_at	RGD motif, leucine rich repeats, tropomodulin domain and proline-rich containing
NA	0.0001355	0.0051699	15.5287	26.8957	14.8658	-1.04459	10.5999	10.0739	10.2152	-1.52015	217654_at	NA
DAZAP1	1e-07	1.75e-05	247.446	155.737	115.68	-2.13906	139.76	158.856	162.731	-1.52059	229813_x_at	DAZ associated protein 1
GPATCH4	1.65e-05	0.001008	34.8501	18.2145	15.3342	-2.27271	17.4173	19.1831	22.9182	-1.52063	224634_at	G patch domain containing 4
CLYBL	0.0002522	0.0081689	20.6211	10.5499	11.0868	-1.85997	13.5857	13.6991	13.5566	-1.52111	238440_at	citrate lyase beta like
HAR1A	2e-07	3.18e-05	12.161	7.80342	7.69202	-1.58099	8.30836	8.62677	7.99313	-1.52143	1557098_s_at	highly accelerated region 1A (non-protein coding)
CASK	4.1e-06	0.0003475	12.7428	6.43218	7.39572	-1.72299	7.93736	8.68062	8.3728	-1.52192	227156_at	calcium/calmodulin-dependent serine protein kinase (MAGUK family)
RPLP0	0.0001764	0.0062955	3281.67	1610.17	1681.49	-1.95164	2284.56	2166.32	2156.15	-1.522	201033_x_at	ribosomal protein, large, P0
SNRPF	0.0009716	0.021897	123.669	80.5264	64.6764	-1.91211	83.0802	83.6507	81.247	-1.52213	203832_at	small nuclear ribonucleoprotein polypeptide F
CLUAP1	7.65e-05	0.0033222	17.0085	10.7913	11.0583	-1.53808	11.838	11.4193	11.1717	-1.52246	204577_s_at	clusterin associated protein 1
NA	1.9e-06	0.0001953	50.9668	27.9527	29.3324	-1.73756	30.7415	34.3074	33.4628	-1.52309	1556345_s_at	NA
TRIB2	5.4e-06	0.0004355	94.5129	17.5912	31.7627	-2.9756	43.5893	58.6882	62.0439	-1.52332	202478_at	tribbles homolog 2 (Drosophila)
ZNF101	1e-07	1.75e-05	38.1671	14.9132	17.5291	-2.17736	25.118	22.0767	25.0446	-1.52397	1552634_a_at	zinc finger protein 101
SLC25A45	5e-07	6.78e-05	7.30834	4.10588	3.95221	-1.84918	4.46817	3.94952	4.79518	-1.5241	1563498_s_at	solute carrier family 25, member 45
ZNF131	8.31e-05	0.0035496	111.468	72.4044	53.1301	-2.09803	68.3278	71.8175	73.1162	-1.52454	1557384_at	zinc finger protein 131
PIP4K2B	9.8e-06	0.0006834	139.018	90.5273	85.8879	-1.6186	92.9216	106.968	91.181	-1.52464	201080_at	phosphatidylinositol-5-phosphate 4-kinase, type II, beta
KLF12	7.9e-06	0.0005829	13.6508	7.4555	7.61585	-1.79241	9.7593	9.00869	8.95312	-1.52469	229881_at	Kruppel-like factor 12
MAPRE2	1.99e-05	0.0011712	195.966	107.426	103.96	-1.885	125.07	134.665	128.526	-1.52472	213489_at	microtubule-associated protein, RP/EB family, member 2
DPP7	7.41e-05	0.0032411	19.0599	11.6663	10.1441	-1.87891	10.5796	14.0336	12.5	-1.52478	238012_at	dipeptidyl-peptidase 7
SFI1	0.0001462	0.005475	39.5634	25.9619	22.5165	-1.75709	27.6136	26.0249	25.9393	-1.52523	214402_s_at	Sfi1 homolog, spindle assembly associated (yeast)
FTSJ3	2.64e-05	0.0014449	92.6673	61.3783	52.5924	-1.76199	55.885	56.5544	60.751	-1.52536	218103_at	FtsJ homolog 3 (E. coli)
FAM153B	0.0001331	0.0050997	15.1912	9.47221	9.68205	-1.56901	10.8181	9.87967	9.95839	-1.52547	214945_at	family with sequence similarity 153, member B
TUSC4	0.0008597	0.0199847	215.39	135.312	132.306	-1.62796	134.127	143.487	141.099	-1.52651	203246_s_at	tumor suppressor candidate 4
KIR3DL3	0.0006009	0.0155602	42.21	21.6977	24.9732	-1.69021	24.4068	30.0085	27.6407	-1.5271	216676_x_at	killer cell immunoglobulin-like receptor, three domains, long cytoplasmic tail, 3
ZNF337	2.2e-06	0.0002156	52.5557	27.6543	26.7814	-1.96239	33.3617	45.5775	34.4136	-1.52718	37860_at	zinc finger protein 337
ATP5G1	0.000651	0.0163423	265.256	192.798	154.939	-1.71201	196.565	188.158	173.665	-1.5274	208972_s_at	ATP synthase, H+ transporting, mitochondrial F0 complex, subunit C1 (subunit 9)
RPP21	0.0001395	0.0052637	186.548	122.97	109.224	-1.70794	124.944	126.651	122.134	-1.52741	218836_at	ribonuclease P/MRP 21kDa subunit
ZNF337	5.89e-05	0.0027085	56.2395	29.9227	32.9275	-1.70798	37.1241	47.5039	36.8196	-1.52743	214760_at	zinc finger protein 337
SUSD4	< 1e-07	< 1e-07	10.508	5.96177	6.5507	-1.60411	6.77191	7.2362	6.87889	-1.52758	223822_at	sushi domain containing 4
FNBP1	9.09e-05	0.0037737	630.771	467.547	391.782	-1.61	446.062	399.303	412.906	-1.52764	213940_s_at	formin binding protein 1
HARS	4e-07	5.79e-05	137.472	79.1437	77.9796	-1.76293	77.4849	93.9063	89.8959	-1.52924	202042_at	histidyl-tRNA synthetase
BDH1	0.000628	0.0159727	22.7526	13.1644	12.5732	-1.80961	14.58	13.264	14.8771	-1.52938	211715_s_at	3-hydroxybutyrate dehydrogenase, type 1
APOA1BP	0.0008657	0.0200676	167.286	93.4603	100.294	-1.66795	109.283	122.56	109.362	-1.52966	225427_s_at	apolipoprotein A-I binding protein
SLC41A1	8.05e-05	0.0034656	54.7962	25.339	26.5119	-2.06686	29.607	36.9333	35.8141	-1.53002	225570_at	solute carrier family 41, member 1
MTG1	0.0004318	0.01238	46.2665	26.5349	21.3141	-2.1707	25.7467	27.28	30.2304	-1.53046	238333_s_at	mitochondrial GTPase 1 homolog (S. cerevisiae)
BNC2	0.000409	0.0118569	9.32496	5.32256	4.8389	-1.92708	5.65511	6.34102	6.08884	-1.53148	238478_at	basonuclin 2
OGFOD1	8.12e-05	0.0034875	87.484	39.7016	42.0594	-2.08001	54.1234	65.5808	57.1139	-1.53175	221090_s_at	2-oxoglutarate and iron-dependent oxygenase domain containing 1
APBA2	0.000612	0.0157021	97.0449	51.2228	55.135	-1.76013	60.6459	68.1884	63.3473	-1.53195	209870_s_at	amyloid beta (A4) precursor protein-binding, family A, member 2
NA	0.000871	0.0201532	12.308	8.37341	8.65537	-1.42201	7.81066	8.66082	8.03354	-1.53208	242099_at	NA
EML5	0.0004292	0.0123184	18.0235	9.77055	9.25028	-1.94842	13.9055	12.5819	11.7632	-1.53219	242443_at	echinoderm microtubule associated protein like 5
C21orf57	0.0006492	0.0163171	103.742	65.4967	61.8038	-1.67856	70.7104	60.6171	67.6962	-1.53246	242565_x_at	chromosome 21 open reading frame 57
FAM160B2	1.7e-06	0.0001798	106.649	62.1669	53.7788	-1.98311	61.5394	78.7214	69.5935	-1.53246	218337_at	family with sequence similarity 160, member B2
RPL13A	1.64e-05	0.0010041	3032.83	1351.02	1711.09	-1.77245	2066.33	1970.11	1978.84	-1.53263	211942_x_at	ribosomal protein L13a
SNHG11	0.0006574	0.01645	66.6423	52.6779	41.1343	-1.62011	44.2496	47.394	43.4787	-1.53276	226149_at	small nucleolar RNA host gene 11 (non-protein coding)
RDH11	0.0002393	0.0078519	18.0868	10.9844	9.59829	-1.88438	12.0285	10.7999	11.7993	-1.53288	217042_at	retinol dehydrogenase 11 (all-trans/9-cis/11-cis)
CCNB1IP1	3.25e-05	0.0017037	78.4838	35.9116	36.979	-2.12239	51.2647	54.7444	51.1974	-1.53296	217988_at	cyclin B1 interacting protein 1
GIMAP1	8e-06	0.0005879	197.899	97.0321	76.7176	-2.57958	108.405	117.118	129.088	-1.53306	1552316_a_at	GTPase, IMAP family member 1
RPLP0	0.0001435	0.0053849	3260.09	1626.1	1670.26	-1.95185	2260.79	2161.09	2126.46	-1.53311	211720_x_at	ribosomal protein, large, P0
KLRF1	2.7e-06	0.0002515	83.4972	7.77546	22.4035	-3.72697	44.5736	64.3944	54.4553	-1.53331	220646_s_at	killer cell lectin-like receptor subfamily F, member 1
CHD6	4.21e-05	0.002085	48.7288	21.557	21.7409	-2.24135	32.6318	35.1387	31.7662	-1.53398	225031_at	chromodomain helicase DNA binding protein 6
NHP2	6.55e-05	0.0029451	439.22	241.929	218.575	-2.00947	287.539	287.997	286.096	-1.53522	209104_s_at	NHP2 ribonucleoprotein homolog (yeast)
SEMA4F	7e-07	8.86e-05	24.8031	12.8801	13.3298	-1.86073	15.4513	16.4398	16.1508	-1.53572	228660_x_at	sema domain, immunoglobulin domain (Ig), transmembrane domain (TM) and short cytoplasmic domain, (semaphorin) 4F
NA	0.0004506	0.0127849	9.17011	5.0805	5.69802	-1.60935	6.02697	5.83165	5.97072	-1.53585	1554007_at	NA
RPS6	1.14e-05	0.000761	4146.02	2065.45	2322.83	-1.7849	2896.29	2768.67	2698.81	-1.53624	201254_x_at	ribosomal protein S6
MAP3K4	9.7e-06	0.0006773	91.3087	43.4289	41.0046	-2.22679	50.3206	69.0056	59.426	-1.53651	204089_x_at	mitogen-activated protein kinase kinase kinase 4
SCRN2	0.0006139	0.015737	46.0091	30.6667	23.707	-1.94074	28.6515	29.1079	29.9428	-1.53656	228730_s_at	secernin 2
NA	5e-07	6.78e-05	67.1576	24.6308	30.351	-2.2127	34.9	41.3403	43.7	-1.53679	239427_at	NA
NXT1	0.0001607	0.0058763	110.043	57.0594	63.0221	-1.7461	74.9148	78.0934	71.5612	-1.53775	218708_at	NTF2-like export factor 1
PPIA	9.4e-06	0.0006606	351.041	147.255	154.804	-2.26764	218.124	213.109	228.212	-1.53822	226336_at	peptidylprolyl isomerase A (cyclophilin A)
SLC5A6	3.9e-05	0.0019671	52.5189	35.2522	29.8669	-1.75844	34.0943	36.9474	34.1303	-1.53878	204087_s_at	solute carrier family 5 (sodium-dependent vitamin transporter), member 6
CCDC101	6.37e-05	0.0028783	157.037	97.3703	92.3498	-1.70046	103.512	93.3599	102.037	-1.53902	48117_at	coiled-coil domain containing 101
THADA	0.00053	0.0142748	119.38	77.0684	61.3319	-1.94645	74.7458	81.179	77.5301	-1.53979	54632_at	thyroid adenoma associated
FASTK	0.0004926	0.0136094	145.383	100.951	84.4417	-1.7217	97.0958	93.0372	94.283	-1.54198	214114_x_at	Fas-activated serine/threonine kinase
LOC92249	6e-07	7.94e-05	23.8527	12.0237	11.4215	-2.08841	15.6144	17.4126	15.468	-1.54207	212957_s_at	hypothetical LOC92249
LYSMD4	7.42e-05	0.0032429	38.7066	25.5424	24.2378	-1.59695	25.5755	26.8507	25.0989	-1.54216	228954_at	LysM, putative peptidoglycan-binding, domain containing 4
TBRG4	7.9e-05	0.0034172	83.1416	46.835	46.954	-1.7707	53.4461	52.4735	53.9107	-1.54221	220789_s_at	transforming growth factor beta regulator 4
NA	9.2e-06	0.0006499	18.2837	12.7124	12.2487	-1.4927	10.9881	10.799	11.8545	-1.54234	243112_at	NA
ZMYND11	8.58e-05	0.0036337	130.612	36.0208	53.8669	-2.42472	77.089	78.3722	84.6249	-1.54342	202136_at	zinc finger, MYND domain containing 11
POMT1	0.0001169	0.0046221	37.2335	24.2054	20.7597	-1.79355	23.8483	24.214	24.1203	-1.54366	218476_at	protein-O-mannosyltransferase 1
PAFAH1B3	0.0001728	0.0062075	85.1739	50.1349	47.6631	-1.787	57.3453	54.4239	55.167	-1.54393	203228_at	platelet-activating factor acetylhydrolase, isoform Ib, gamma subunit 29kDa
NMT2	< 1e-07	< 1e-07	16.7378	6.55604	7.44405	-2.24848	9.83784	11.356	10.8406	-1.54399	205006_s_at	N-myristoyltransferase 2
ZC3H12D	0.0001791	0.0063693	48.6942	17.7629	17.5645	-2.77231	26.1928	31.3135	31.5367	-1.54405	1559263_s_at	zinc finger CCCH-type containing 12D
FAF1	0.000637	0.0161142	100.242	54.699	59.5133	-1.68437	58.9967	66.3971	64.9135	-1.54424	224217_s_at	Fas (TNFRSF6) associated factor 1
PIGU	2e-07	3.18e-05	34.8945	18.8477	14.8216	-2.3543	19.2714	21.5826	22.585	-1.54503	225903_at	phosphatidylinositol glycan anchor biosynthesis, class U
CCDC136	0.0003392	0.0102519	17.7083	12.7619	13.3929	-1.32221	12.5095	11.7497	11.4594	-1.54531	226972_s_at	coiled-coil domain containing 136
NSUN5	0.0004695	0.0131438	297.363	226.58	199.238	-1.4925	206.925	193.086	192.409	-1.54548	203802_x_at	NOL1/NOP2/Sun domain family, member 5
NOP14	< 1e-07	< 1e-07	90.4143	46.2437	42.917	-2.10672	55.2486	61.1036	58.4945	-1.54569	214661_s_at	NOP14 nucleolar protein homolog (yeast)
SERGEF	2e-06	0.0002025	56.899	30.2928	27.3718	-2.07875	31.9876	33.403	36.8027	-1.54605	232983_s_at	secretion regulating guanine nucleotide exchange factor
SLFN5	1.12e-05	0.0007541	574.072	234.819	209.834	-2.73584	335.258	349.563	370.871	-1.5479	238430_x_at	schlafen family member 5
MDH1	0.0006398	0.0161501	74.0177	39.6139	28.479	-2.59903	44.2744	52.9864	47.7979	-1.54855	235374_at	malate dehydrogenase 1, NAD (soluble)
NA	1.06e-05	0.0007226	56.8537	29.0678	24.148	-2.35438	33.1643	32.3971	36.7074	-1.54883	1563469_at	NA
CIRH1A	7.58e-05	0.0032997	83.751	36.9276	42.5536	-1.96813	50.5527	54.1108	54.0735	-1.54884	230656_s_at	cirrhosis, autosomal recessive 1A (cirhin)
NA	0.0001987	0.0068803	15.2837	7.47688	8.74611	-1.74749	9.80396	9.83568	9.86464	-1.54934	234081_at	NA
NA	0.000393	0.0115152	28.4144	17.4578	17.2192	-1.65015	18.5128	17.1609	18.3373	-1.54954	215854_at	NA
ASTE1	0.0003041	0.009447	93.1503	63.9235	58.5876	-1.58993	61.4556	63.442	60.1089	-1.54969	221135_s_at	asteroid homolog 1 (Drosophila)
NA	0.0001633	0.0059365	19.3146	8.44084	8.10798	-2.38218	11.2296	13.3154	12.4613	-1.54998	228843_at	NA
ASS1	9.2e-06	0.0006499	16.209	8.44313	9.42242	-1.72026	10.8818	11.4896	10.457	-1.55006	207076_s_at	argininosuccinate synthetase 1
BCS1L	5.99e-05	0.0027429	75.7344	45.591	36.796	-2.05822	50.693	49.9724	48.8571	-1.55012	207618_s_at	BCS1-like (yeast)
UCHL5IP	0.0008662	0.0200676	86.0694	51.5034	47.5988	-1.80823	50.8753	55.0955	55.5151	-1.55038	213334_x_at	UCHL5 interacting protein
TTC12	5.5e-06	0.000439	25.5357	16.1679	15.6009	-1.63681	14.8262	16.5736	16.4654	-1.55087	244571_s_at	tetratricopeptide repeat domain 12
ATPGD1	2.07e-05	0.0012015	27.6327	13.8048	16.4591	-1.67887	15.8803	20.7775	17.8166	-1.55096	228984_at	ATP-grasp domain containing 1
ALKBH6	0.0001226	0.004788	58.2328	41.0403	31.5753	-1.84425	34.135	37.5098	37.5433	-1.55109	225969_at	alkB, alkylation repair homolog 6 (E. coli)
DNAJC11	6.3e-06	0.0004865	101.91	56.7653	50.8981	-2.00224	59.742	64.6929	65.6809	-1.5516	215792_s_at	DnaJ (Hsp40) homolog, subfamily C, member 11
NA	< 1e-07	< 1e-07	37.9233	19.2981	19.0746	-1.98815	22.0128	23.6781	24.4413	-1.55161	214148_at	NA
MEN1	0.0001662	0.0060099	92.5909	45.8218	48.4817	-1.90981	52.1331	60.3646	59.6403	-1.55249	202645_s_at	multiple endocrine neoplasia I
TSEN54	4e-07	5.79e-05	57.3066	27.2895	31.1761	-1.83816	37.3681	36.7397	36.8988	-1.55308	241402_at	tRNA splicing endonuclease 54 homolog (S. cerevisiae)
APEX1	2.8e-06	0.0002582	579.608	252.649	279.044	-2.07712	394.8	386.903	373.178	-1.55317	210027_s_at	APEX nuclease (multifunctional DNA repair enzyme) 1
DDX24	1e-06	0.0001186	202.849	88.7585	109.185	-1.85785	111.915	136.581	130.587	-1.55336	200694_s_at	DEAD (Asp-Glu-Ala-Asp) box polypeptide 24
FAHD2A	4.84e-05	0.0023091	40.9133	21.3271	21.6751	-1.88757	25.2392	24.9851	26.3339	-1.55364	222056_s_at	fumarylacetoacetate hydrolase domain containing 2A
PRMT7	0.0003214	0.0098556	47.9811	30.5774	27.8622	-1.72208	32.5761	26.5859	30.8753	-1.55403	219408_at	protein arginine methyltransferase 7
POLR3A	< 1e-07	< 1e-07	62.3027	44.8513	34.5394	-1.80382	38.144	41.8219	40.0901	-1.55407	227872_at	polymerase (RNA) III (DNA directed) polypeptide A, 155kDa
ILVBL	0.000293	0.0091888	57.5238	36.4909	31.3321	-1.83594	34.5945	34.0033	37.0075	-1.55438	210624_s_at	ilvB (bacterial acetolactate synthase)-like
TRAPPC6A	0.0003869	0.0113608	173.221	91.0776	85.7581	-2.01988	109.235	106.789	111.425	-1.55459	204985_s_at	trafficking protein particle complex 6A
MCOLN2	< 1e-07	< 1e-07	64.3516	15.4617	21.0094	-3.06299	29.9371	41.8512	41.3945	-1.55459	230110_at	mucolipin 2
MLL	2.56e-05	0.0014152	112.739	38.741	48.5311	-2.32302	62.9484	71.1885	72.4744	-1.55556	226981_at	myeloid/lymphoid or mixed-lineage leukemia (trithorax homolog, Drosophila)
CCDC57	0.0009122	0.0208418	82.4718	60.8279	49.0191	-1.68244	64.7575	48.2663	53.0154	-1.55562	227783_at	coiled-coil domain containing 57
RNASEH2C	0.0002167	0.0073046	92.2528	58.0434	48.9099	-1.88618	56.3854	63.0833	59.2613	-1.55671	227543_at	ribonuclease H2, subunit C
AUTS2	< 1e-07	< 1e-07	44.5276	10.0777	14.4913	-3.07271	23.6525	24.3772	28.6025	-1.55678	212599_at	autism susceptibility candidate 2
PPARA	0.0003937	0.0115233	75.8304	47.584	43.5337	-1.74188	45.0895	51.579	48.6924	-1.55733	223437_at	peroxisome proliferator-activated receptor alpha
GGT7	2.58e-05	0.0014206	40.6121	26.9072	25.6502	-1.5833	27.5854	27.8311	26.0758	-1.55746	226470_at	gamma-glutamyltransferase 7
TFB1M	7.4e-06	0.000555	48.245	26.5377	26.0485	-1.85212	29.6845	31.1577	30.9531	-1.55865	219169_s_at	transcription factor B1, mitochondrial
RPUSD2	7.34e-05	0.003226	28.0151	15.5888	16.4114	-1.70705	18.7704	19.535	17.9727	-1.55876	221940_at	RNA pseudouridylate synthase domain containing 2
SLFN13	0.000142	0.005336	21.407	10.8031	8.97677	-2.38471	12.6828	13.3462	13.7325	-1.55886	1558217_at	schlafen family member 13
C6orf125	0.0003039	0.0094461	134.662	70.3655	61.5519	-2.18778	85.8018	84.8932	86.3786	-1.55897	224448_s_at	chromosome 6 open reading frame 125
NA	9.75e-05	0.0039991	23.7965	14.331	13.2391	-1.79744	14.2231	12.8622	15.2615	-1.55925	235752_at	NA
CCL28	0.0003724	0.0110268	10.7172	5.87997	6.2735	-1.70833	6.92152	7.78631	6.8723	-1.55948	224027_at	chemokine (C-C motif) ligand 28
C1orf216	3.48e-05	0.0018086	49.9683	29.2344	28.7102	-1.74044	26.961	32.0483	32.0396	-1.55958	212791_at	chromosome 1 open reading frame 216
NA	4e-07	5.79e-05	12.3633	5.19337	5.38524	-2.29577	6.93914	7.78417	7.92274	-1.56048	237347_at	NA
PIK3R1	0.0008152	0.0192234	21.6825	15.7609	12.8661	-1.68524	14.3957	15.6025	13.8875	-1.5613	212249_at	phosphoinositide-3-kinase, regulatory subunit 1 (alpha)
METT11D1	0.0001506	0.0055824	155.711	77.1162	75.8373	-2.05322	81.4968	115.073	99.7241	-1.56142	218366_x_at	methyltransferase 11 domain containing 1
FTO	3.1e-06	0.0002779	94.777	44.0936	39.2829	-2.41268	47.6452	64.5849	60.6461	-1.56279	209702_at	fat mass and obesity associated
KIAA0406	0.0003062	0.0094799	44.3317	31.7526	26.254	-1.68857	27.5209	30.2882	28.3642	-1.56294	212898_at	KIAA0406
NA	6e-06	0.00047	12.746	5.97763	5.5546	-2.29468	8.3099	8.27329	8.15396	-1.56317	243646_at	NA
NUMA1	3e-07	4.57e-05	176.26	102.137	97.6464	-1.80508	97.1177	115.102	112.757	-1.56318	200747_s_at	nuclear mitotic apparatus protein 1
USP28	7.6e-06	0.0005638	82.9976	36.0525	40.3188	-2.05853	53.0603	55.4074	53.0805	-1.56362	231837_at	ubiquitin specific peptidase 28
RSAD1	2.6e-06	0.0002443	105.051	46.5275	52.2665	-2.00992	61.6558	69.9028	67.1772	-1.5638	218307_at	radical S-adenosyl methionine domain containing 1
DUS1L	0.000551	0.0146598	304.077	193.342	180.999	-1.67999	210.325	192.857	194.33	-1.56475	217912_at	dihydrouridine synthase 1-like (S. cerevisiae)
TOMM20	0.0007099	0.0174155	147.922	72.2307	94.0442	-1.5729	101.489	93.2974	94.4762	-1.56571	212773_s_at	translocase of outer mitochondrial membrane 20 homolog (yeast)
METT11D1	0.0007776	0.01859	148.006	74.9156	73.8663	-2.0037	79.9124	93.6274	94.5118	-1.566	223988_x_at	methyltransferase 11 domain containing 1
ARHGEF9	3.46e-05	0.0018	14.3081	7.04174	7.03063	-2.03511	8.21039	10.6381	9.13543	-1.56622	203263_s_at	Cdc42 guanine nucleotide exchange factor (GEF) 9
SLC2A4RG	0.0002098	0.0071558	95.9786	48.9178	51.6817	-1.85711	56.5173	59.2505	61.274	-1.56639	218494_s_at	SLC2A4 regulator
KRTCAP2	0.0006254	0.0159288	808.661	546.909	431.653	-1.8734	516.459	571.002	515.989	-1.5672	224885_s_at	keratinocyte associated protein 2
NA	2.56e-05	0.0014152	19.616	11.5131	11.3708	-1.72512	12.7759	15.7101	12.5164	-1.56723	1560094_at	NA
RPLP0	3.58e-05	0.0018501	3528.85	1628	1804.31	-1.95579	2465.13	2267.54	2251.05	-1.56765	211972_x_at	ribosomal protein, large, P0
SAMM50	0.0006965	0.0171769	158.597	88.3573	83.7946	-1.89268	94.7896	101.121	101.125	-1.56833	201570_at	sorting and assembly machinery component 50 homolog (S. cerevisiae)
FBRSL1	0.0001471	0.0054974	105.279	60.3877	55.6994	-1.89012	60.6545	70.0597	67.1076	-1.56881	225704_at	fibrosin-like 1
GPX7	0.0006396	0.0161501	28.066	12.2264	15.3995	-1.82252	16.5747	17.8539	17.8807	-1.56963	213170_at	glutathione peroxidase 7
ZBTB4	< 1e-07	< 1e-07	256.297	88.0759	93.059	-2.75413	119.105	154.337	163.181	-1.57063	225629_s_at	zinc finger and BTB domain containing 4
C21orf63	5e-07	6.78e-05	21.7513	11.7157	13.1305	-1.65655	15.1411	14.899	13.8471	-1.57082	227188_at	chromosome 21 open reading frame 63
IGSF9B	0.0002589	0.0083562	35.065	20.3568	19.7215	-1.77801	24.386	21.6609	22.3143	-1.57141	215255_at	immunoglobulin superfamily, member 9B
RALGDS	0.0002733	0.0087079	271.394	114.24	147.401	-1.84119	178.682	177.49	172.639	-1.57203	209050_s_at	ral guanine nucleotide dissociation stimulator
NA	0.0005594	0.0148041	42.6355	45.5822	32.9478	-1.29403	29.4442	30.8845	27.1187	-1.57218	240743_at	NA
NA	< 1e-07	< 1e-07	21.1078	7.75521	8.83877	-2.38809	10.9004	12.3177	13.4256	-1.57221	221973_at	NA
NDUFV1	0.0007024	0.0172756	556.398	327.676	303.861	-1.83109	369.714	345.378	353.891	-1.57223	208714_at	NADH dehydrogenase (ubiquinone) flavoprotein 1, 51kDa
TRAF3IP3	6e-07	7.94e-05	494.299	216.744	211.515	-2.33694	284.63	352.79	314.005	-1.57418	205804_s_at	TRAF3 interacting protein 3
ASXL1	3e-06	0.0002711	84.1257	49.2435	51.3984	-1.63674	53.6563	58.5118	53.435	-1.57435	212238_at	additional sex combs like 1 (Drosophila)
C5orf45	3e-07	4.57e-05	53.2711	33.5778	28.5119	-1.86838	31.6645	35.2807	33.8317	-1.57459	220341_s_at	chromosome 5 open reading frame 45
TGFBR3	6.1e-06	0.0004751	103.235	20.6483	29.3768	-3.51416	50.392	70.9691	65.5624	-1.5746	226625_at	transforming growth factor, beta receptor III
MACROD1	0.0009105	0.0208117	14.7802	11.4148	7.62584	-1.93818	11.6798	8.96062	9.38496	-1.57489	1559731_x_at	MACRO domain containing 1
PHF15	< 1e-07	< 1e-07	297.995	114.894	134.33	-2.21838	161.068	208.011	189.138	-1.57554	212660_at	PHD finger protein 15
JMJD2C	0.0003272	0.0099831	44.255	22.2027	17.0835	-2.59051	25.7003	24.1495	28.069	-1.57665	1556493_a_at	jumonji domain containing 2C
CHD3	0.0002809	0.008893	154.582	100.565	88.5941	-1.74484	99.7033	100.777	98.018	-1.57708	208807_s_at	chromodomain helicase DNA binding protein 3
FAM162A	2.37e-05	0.0013318	164.09	69.0405	76.2555	-2.15185	96.0337	97.944	103.999	-1.5778	220942_x_at	family with sequence similarity 162, member A
CCDC107	0.0004418	0.0125744	112.016	66.567	56.3367	-1.98833	68.4278	73.7814	70.9384	-1.57906	229063_s_at	coiled-coil domain containing 107
MRPL12	0.0009842	0.0221148	106.714	58.7611	66.9513	-1.5939	78.2952	69.8257	67.5397	-1.58002	203931_s_at	mitochondrial ribosomal protein L12
DDX27	1.77e-05	0.0010658	177.731	118.171	100.653	-1.76578	109.586	106.683	112.476	-1.58016	215693_x_at	DEAD (Asp-Glu-Ala-Asp) box polypeptide 27
CDK4	0.000121	0.0047492	120.716	51.2686	57.7496	-2.09034	71.1555	77.6544	76.3807	-1.58045	202246_s_at	cyclin-dependent kinase 4
NUP210	8e-07	9.9e-05	53.7738	23.525	28.9924	-1.85476	31.4362	34.7587	33.996	-1.58177	212315_s_at	nucleoporin 210kDa
CEP250	3.5e-06	0.0003077	89.4972	50.7682	47.6162	-1.87955	47.8758	57.6097	56.5554	-1.58247	209495_at	centrosomal protein 250kDa
CRYZL1	0.0003734	0.0110474	156.2	99.4115	66.9858	-2.33183	111.778	106.36	98.5261	-1.58536	1552347_at	crystallin, zeta (quinone reductase)-like 1
WWP1	0.0001818	0.0064378	97.6358	30.4667	53.3942	-1.82858	72.2003	69.831	61.5847	-1.58539	212638_s_at	WW domain containing E3 ubiquitin protein ligase 1
CTA-221G9.4	0.0002866	0.0090473	12.7459	5.08159	5.79213	-2.20056	7.05772	8.5786	8.0348	-1.58634	225525_at	KIAA1671 protein
KIR2DL1	1.03e-05	0.0007093	30.8566	16.4847	19.1197	-1.61386	17.587	19.8819	19.4472	-1.58668	210890_x_at	killer cell immunoglobulin-like receptor, two domains, long cytoplasmic tail, 1
PHB	1.85e-05	0.0011055	167.06	90.1434	79.6369	-2.09778	106.741	94.9065	105.239	-1.58744	200658_s_at	prohibitin
EEF1D	0.0004664	0.0130906	2000.77	1331.56	1124.76	-1.77884	1342.77	1207.74	1260.05	-1.58784	203113_s_at	eukaryotic translation elongation factor 1 delta (guanine nucleotide exchange protein)
NA	0.0001312	0.0050517	8.56326	5.87968	5.73711	-1.49261	5.8579	6.60329	5.39266	-1.58795	243217_at	NA
NA	0.0007537	0.0181856	11.5758	7.29843	7.61482	-1.52017	7.54253	7.56825	7.2885	-1.58823	220612_at	NA
ENTPD6	0.0005112	0.013954	129.614	90.2161	71.8107	-1.80494	81.8867	93.8638	81.5946	-1.58851	201704_at	ectonucleoside triphosphate diphosphohydrolase 6 (putative function)
UBQLN4	7.24e-05	0.0031897	81.9042	46.8783	39.0036	-2.09991	47.2283	54.5589	51.5562	-1.58864	224513_s_at	ubiquilin 4
CYFIP2	0.0007721	0.018507	1102.12	769.151	641.459	-1.71815	663.614	620.716	693.355	-1.58955	215785_s_at	cytoplasmic FMR1 interacting protein 2
XYLT2	< 1e-07	< 1e-07	92.7358	66.8721	48.6091	-1.90779	58.8473	53.2074	58.3374	-1.58964	219401_at	xylosyltransferase II
USP54	4.93e-05	0.0023398	25.7286	17.0855	15.3368	-1.67758	16.3192	14.671	16.1836	-1.5898	238522_at	ubiquitin specific peptidase 54
LPHN1	2e-07	3.18e-05	18.3147	11.4954	11.76	-1.55736	11.7144	12.9482	11.5197	-1.58986	47560_at	latrophilin 1
NA	< 1e-07	< 1e-07	268.371	65.5917	86.0103	-3.12023	133.034	164.151	168.795	-1.58992	227030_at	NA
NA	0.0001783	0.0063467	410.743	273.486	172.273	-2.38426	253.468	224.674	258.22	-1.59067	217164_at	NA
EP400	0.0005625	0.0148672	8.94621	7.09409	5.87786	-1.52202	5.75674	5.88706	5.62115	-1.59153	230628_at	E1A binding protein p400
C14orf64	5.25e-05	0.0024534	16.5157	9.3096	9.8027	-1.68481	10.5087	10.4035	10.3758	-1.59174	1564211_at	chromosome 14 open reading frame 64
CXXC1	0.0002112	0.0071901	172.035	120.82	103.223	-1.66663	113.752	111.45	108.052	-1.59216	218058_at	CXXC finger 1 (PHD domain)
RPRD2	2.84e-05	0.0015298	104.371	64.9177	60.3152	-1.73043	60.0639	79.0983	65.5491	-1.59226	212553_at	regulation of nuclear pre-mRNA domain containing 2
CROCCL2	4.58e-05	0.0022141	23.8006	13.199	12.0711	-1.97171	14.7015	15.8899	14.9456	-1.59248	219139_s_at	ciliary rootlet coiled-coil, rootletin-like 2
ZNF506	1.08e-05	0.0007326	77.3113	47.4863	40.6108	-1.90371	50.8658	46.6817	48.5462	-1.59253	221626_at	zinc finger protein 506
RUVBL1	2e-07	3.18e-05	44.9871	20.4093	18.6899	-2.40703	25.5492	24.5165	28.2358	-1.59326	201614_s_at	RuvB-like 1 (E. coli)
NA	2.09e-05	0.0012092	17.9177	12.8173	10.2209	-1.75305	12.4756	9.90169	11.2453	-1.59335	222345_at	NA
GNB2L1	1.99e-05	0.0011712	74.6023	42.6753	34.1546	-2.18426	43.4442	46.9024	46.8202	-1.59338	222034_at	guanine nucleotide binding protein (G protein), beta polypeptide 2-like 1
NA	4.6e-05	0.0022218	75.756	46.084	47.3836	-1.59878	55.3624	52.1953	47.543	-1.59342	243224_at	NA
PTPN7	0.0002725	0.0086874	153.661	83.5132	88.6982	-1.7324	96.8276	100.061	96.4342	-1.59343	204852_s_at	protein tyrosine phosphatase, non-receptor type 7
RANGRF	5.6e-06	0.0004457	134.372	60.5705	61.4271	-2.18751	83.0132	90.4448	84.3122	-1.59375	218526_s_at	RAN guanine nucleotide release factor
NA	1.7e-05	0.0010316	7.44962	6.2489	4.99593	-1.49114	5.36918	5.80151	4.67352	-1.59401	244045_at	NA
CAND1	2e-06	0.0002025	37.0144	16.9367	14.6179	-2.53213	23.9637	29.5535	23.215	-1.59442	239771_at	cullin-associated and neddylation-dissociated 1
DNAJC27	0.0001366	0.005201	20.479	10.3898	10.0936	-2.02891	11.709	14.1506	12.8416	-1.59475	223504_at	DnaJ (Hsp40) homolog, subfamily C, member 27
PWP1	4.82e-05	0.0023016	282.014	146.662	147.509	-1.91184	178.493	174.74	176.816	-1.59495	201606_s_at	PWP1 homolog (S. cerevisiae)
SBK1	< 1e-07	< 1e-07	94.2595	33.6628	36.5267	-2.58056	43.6065	49.9905	59.0717	-1.59568	226549_at	SH3-binding domain kinase 1
UTP20	1.1e-06	0.0001266	27.9937	14.4626	14.9015	-1.87859	15.4779	19.0808	17.5417	-1.59584	209725_at	UTP20, small subunit (SSU) processome component, homolog (yeast)
DTX3	2.8e-06	0.0002582	68.4393	29.9533	26.5838	-2.57448	33.9933	33.8358	42.8816	-1.59601	235721_at	deltex homolog 3 (Drosophila)
NA	0.0002947	0.0092231	26.4947	15.9939	14.7918	-1.79117	19.2902	21.3043	16.5923	-1.5968	243113_at	NA
MRPL54	0.0002334	0.0077153	241.756	156.378	147.727	-1.6365	165.058	141.894	151.387	-1.59694	225797_at	mitochondrial ribosomal protein L54
NOP2	1.15e-05	0.0007668	164.014	82.9284	77.9501	-2.10408	87.7067	98.5295	102.687	-1.59722	214427_at	NOP2 nucleolar protein homolog (yeast)
KLHDC4	5e-06	0.0004099	120.882	62.3152	59.887	-2.0185	69.8032	76.33	75.6719	-1.59745	221219_s_at	kelch domain containing 4
NA	2e-07	3.18e-05	60.7507	25.2276	27.4862	-2.21023	35.4684	44.4679	38.0281	-1.59752	227603_at	NA
RPS18	1.68e-05	0.0010229	4748.85	1905.38	2264.13	-2.09742	3219.65	3037.2	2972.22	-1.59774	201049_s_at	ribosomal protein S18
ILKAP	6.8e-06	0.0005178	98.0042	54.2156	53.1942	-1.84239	60.0878	59.5344	61.33	-1.59798	221548_s_at	integrin-linked kinase-associated serine/threonine phosphatase 2C
MRP63	0.0001003	0.0040803	87.5271	59.6371	45.1872	-1.93699	66.3867	63.1292	54.763	-1.59829	224535_s_at	mitochondrial ribosomal protein 63
HPCAL4	2.2e-06	0.0002156	9.74889	5.86434	5.83118	-1.67185	5.75969	5.76095	6.09844	-1.59859	219671_at	hippocalcin like 4
LOC100129196	0.0001222	0.004786	15.6523	8.4761	9.12575	-1.71518	10.4336	10.9317	9.78153	-1.60019	1557558_s_at	similar to hCG2033298
C6orf26	1.53e-05	0.0009474	28.6422	16.5603	16.3175	-1.7553	16.4338	19.2471	17.8984	-1.60027	212913_at	chromosome 6 open reading frame 26
RPS6	4.87e-05	0.0023174	2958.81	1460.84	1755.21	-1.68573	2206.46	1902.92	1848.91	-1.6003	209134_s_at	ribosomal protein S6
FLJ40142	0.0009601	0.0217095	63.0431	58.0319	46.6195	-1.35229	52.0572	42.0521	39.3829	-1.60077	229679_at	FLJ40142 protein
ZNF862	1.52e-05	0.0009433	165.663	94.5104	79.3582	-2.08753	114.937	102.953	103.481	-1.60089	226808_at	zinc finger protein 862
BCAT2	0.0002894	0.0091199	44.6502	27.0453	24.1137	-1.85165	26.326	30.7517	27.8868	-1.60112	203576_at	branched chain aminotransferase 2, mitochondrial
NA	0.0004901	0.0135608	248.794	139.502	114.032	-2.18179	179.306	177.787	155.364	-1.60135	232890_at	NA
SYNJ2BP	5.97e-05	0.002736	17.497	9.93464	8.90443	-1.96497	11.6613	10.9939	10.9246	-1.6016	219156_at	synaptojanin 2 binding protein
NAT11	0.0006077	0.0156358	99.0952	42.8771	47.6911	-2.07785	70.0165	66.9595	61.8703	-1.60166	218734_at	N-acetyltransferase 11 (GCN5-related, putative)
MAGED1	0.0001117	0.0044513	99.164	51.5047	53.7905	-1.84352	56.4835	62.7475	61.9132	-1.60166	209014_at	melanoma antigen family D, 1
CAPS	2.09e-05	0.0012092	97.3654	68.3332	54.3124	-1.79269	69.1485	64.2385	60.7814	-1.6019	226424_at	calcyphosine
NA	5.47e-05	0.0025475	20.7083	11.7729	12.7528	-1.62383	12.9637	13.6356	12.9268	-1.60197	1558348_at	NA
AARSD1	0.0002447	0.0079827	40.2819	23.6661	24.5259	-1.64242	22.2029	27.088	25.1404	-1.60228	222064_s_at	alanyl-tRNA synthetase domain containing 1
PRPF31	2.3e-06	0.0002238	141.705	87.4818	75.2887	-1.88215	82.228	87.9024	88.4201	-1.60263	202408_s_at	PRP31 pre-mRNA processing factor 31 homolog (S. cerevisiae)
PPIH	6.5e-06	0.0004984	102.16	45.4636	50.4024	-2.02689	61.5698	72.9505	63.7451	-1.60263	204228_at	peptidylprolyl isomerase H (cyclophilin H)
NA	1.01e-05	0.0007008	14.627	8.63384	7.94644	-1.8407	10.1074	9.77411	9.12549	-1.60287	232796_at	NA
MCM3	8.7e-06	0.0006275	80.4857	36.812	44.3807	-1.81353	45.9028	55.1287	50.2071	-1.60307	201555_at	minichromosome maintenance complex component 3
FMNL3	2e-07	3.18e-05	28.9683	11.4768	14.8424	-1.95172	15.9352	19.245	18.0684	-1.60326	227844_at	formin-like 3
GOLGA1	1.3e-06	0.0001439	12.0648	6.22711	6.34025	-1.90289	8.15176	8.26439	7.52015	-1.60433	214997_at	golgi autoantigen, golgin subfamily a, 1
C17orf63	0.0004284	0.0123019	114.186	72.9476	81.3098	-1.40433	75.4046	82.5641	71.1473	-1.60492	222641_s_at	chromosome 17 open reading frame 63
KLRG1	2.55e-05	0.0014126	88.7458	19.0298	43.3892	-2.04534	45.8764	63.0975	55.2946	-1.60496	210288_at	killer cell lectin-like receptor subfamily G, member 1
CD81	8e-07	9.9e-05	284.235	122.447	109.148	-2.60413	155.091	199.455	177.01	-1.60575	200675_at	CD81 molecule
ASB1	1.13e-05	0.0007581	64.319	47.2862	36.536	-1.76043	38.0575	45.0816	40.033	-1.60665	212818_s_at	ankyrin repeat and SOCS box-containing 1
TSEN54	< 1e-07	< 1e-07	260.171	92.774	107.142	-2.42828	144.019	155.613	161.915	-1.60684	225879_at	tRNA splicing endonuclease 54 homolog (S. cerevisiae)
CLOCK	1.17e-05	0.0007754	124.845	53.3889	49.5229	-2.52096	71.3242	81.8394	77.6724	-1.60733	204980_at	clock homolog (mouse)
NA	0.000423	0.0121916	58.9641	30.955	21.6781	-2.71998	32.4963	31.7438	36.677	-1.60766	213156_at	NA
CASP6	5.4e-06	0.0004355	77.2486	36.7412	41.4845	-1.86211	46.9194	48.7303	48.0441	-1.60787	209790_s_at	caspase 6, apoptosis-related cysteine peptidase
DNHD1	0.0001933	0.0067145	23.2128	13.4662	13.129	-1.76805	13.3642	12.8509	14.4333	-1.60827	229631_at	dynein heavy chain domain 1
LOC387723	1.09e-05	0.0007376	24.1697	9.66715	9.99731	-2.41762	14.9133	11.6757	15.0146	-1.60975	229323_at	similar to hCG1648656
LOC692247	8.36e-05	0.0035626	11.6093	6.47117	6.15533	-1.88606	6.12472	7.60403	7.21013	-1.61014	1569453_a_at	hypothetical locus LOC692247
ITM2A	0.0002392	0.0078519	61.2372	11.2146	26.2067	-2.33669	31.5776	35.1964	38.0176	-1.61076	202746_at	integral membrane protein 2A
MAP3K4	5e-07	6.78e-05	123.6	51.2112	44.3694	-2.78571	61.4087	79.1057	76.7237	-1.61098	216199_s_at	mitogen-activated protein kinase kinase kinase 4
LIMA1	5e-07	6.78e-05	12.6181	5.88602	6.61672	-1.907	7.16495	6.74198	7.83141	-1.61121	222457_s_at	LIM domain and actin binding 1
POLR1E	0.0001995	0.0068949	64.5456	39.2213	36.5808	-1.76447	40.0683	38.0987	40.0488	-1.61167	218997_at	polymerase (RNA) I polypeptide E, 53kDa
MGC57346	4.65e-05	0.002238	23.5669	11.8556	12.1487	-1.93988	14.4343	14.3992	14.6118	-1.61287	1559171_at	hypothetical LOC401884
C6orf108	6.52e-05	0.0029364	163.203	93.3526	84.6492	-1.92799	102.47	93.6902	101.087	-1.61448	39817_s_at	chromosome 6 open reading frame 108
GCNT7	0.0005295	0.0142683	111.198	154.738	104.472	-1.06439	102.237	70.8514	68.8385	-1.61535	242040_at	glucosaminyl (N-acetyl) transferase family member 7
NA	0.0001258	0.0048712	146.723	59.2021	57.8093	-2.53805	82.6245	95.6643	90.8211	-1.61551	240499_at	NA
NA	6.75e-05	0.0030176	271.774	114.091	126.175	-2.15395	156.668	181.397	168.099	-1.61675	1564155_x_at	NA
LNPEP	0.0002183	0.0073348	422.972	246.114	181.187	-2.33445	282.527	291.106	261.453	-1.61777	231866_at	leucyl/cystinyl aminopeptidase
FAM162A	0.0004469	0.0126931	149.368	58.9815	76.1306	-1.962	85.6746	92.7181	92.3253	-1.61785	223193_x_at	family with sequence similarity 162, member A
FARP2	0.0006876	0.0170111	26.4818	19.7781	16.1131	-1.6435	17.9308	18.4412	16.3667	-1.61803	204511_at	FERM, RhoGEF and pleckstrin domain protein 2
METT10D	0.0005881	0.0153481	49.735	24.8975	22.3784	-2.22246	30.8391	26.931	30.7302	-1.61844	238931_at	methyltransferase 10 domain containing
NA	4.37e-05	0.0021371	11.1306	5.66158	5.10352	-2.18097	6.25551	6.2787	6.87337	-1.61938	1557581_x_at	NA
ILVBL	0.0001618	0.0058976	39.2116	22.3908	22.1304	-1.77184	24.6416	22.1642	24.2097	-1.61966	202993_at	ilvB (bacterial acetolactate synthase)-like
CD8B	2.3e-06	0.0002238	180.056	41.9763	61.0747	-2.94813	89.5323	134.741	111.157	-1.61983	207979_s_at	CD8b molecule
MMAB	0.0002442	0.0079711	55.4491	36.4042	31.9636	-1.73476	38.1666	39.0461	34.2098	-1.62085	225826_at	methylmalonic aciduria (cobalamin deficiency) cblB type
FGF9	2.62e-05	0.0014354	11.4489	7.28753	6.50546	-1.75989	6.66274	6.48589	7.0632	-1.62092	206404_at	fibroblast growth factor 9 (glia-activating factor)
LOC100132999	4.6e-06	0.0003857	1327.37	1021.3	671.079	-1.97796	851.797	802.79	818.876	-1.62096	229872_s_at	hypothetical protein LOC100132999
AP3M2	8.1e-06	0.0005929	46.9611	22.2308	22.5035	-2.08683	25.3251	30.556	28.9701	-1.62102	203410_at	adaptor-related protein complex 3, mu 2 subunit
TNRC6A	7.24e-05	0.0031897	70.2675	40.4401	39.5555	-1.77643	40.6911	42.4111	43.3454	-1.62111	233836_at	trinucleotide repeat containing 6A
SLC25A45	3.34e-05	0.0017458	212.145	132.235	114.052	-1.86007	129.546	129.512	130.815	-1.62171	236436_at	solute carrier family 25, member 45
MGMT	0.0002467	0.0080335	109.134	67.8929	56.4538	-1.93315	73.7482	63.0214	67.2722	-1.62227	204880_at	O-6-methylguanine-DNA methyltransferase
IGSF8	0.0009072	0.0207623	62.7975	37.9295	36.8585	-1.70375	41.6684	41.5509	38.6994	-1.6227	225025_at	immunoglobulin superfamily, member 8
CBLB	2.7e-06	0.0002515	154.019	45.0352	51.0746	-3.01557	78.9709	99.2181	94.9116	-1.62276	209682_at	Cas-Br-M (murine) ecotropic retroviral transforming sequence b
LSS	2.8e-06	0.0002582	135.544	71.7001	66.4646	-2.03934	74.3557	93.258	83.5128	-1.62303	202245_at	lanosterol synthase (2,3-oxidosqualene-lanosterol cyclase)
TSGA14	6.97e-05	0.0030932	45.9323	25.1771	22.2797	-2.06162	28.5843	30.3748	28.2873	-1.62378	225484_at	testis specific, 14
HINT2	3.23e-05	0.0016964	269.882	150.382	143.739	-1.87758	185.893	172.353	166.073	-1.62508	224415_s_at	histidine triad nucleotide binding protein 2
NA	2e-07	3.18e-05	30.7352	20.1311	17.7371	-1.73282	19.9552	21.5527	18.9082	-1.6255	228972_at	NA
MRPL11	0.0002141	0.0072438	119.265	72.0188	61.2919	-1.94585	78.2406	71.8096	73.3601	-1.62574	219162_s_at	mitochondrial ribosomal protein L11
C12orf30	0.0004229	0.0121916	29.216	17.5899	11.9488	-2.4451	19.8933	19.3128	17.9666	-1.62613	236816_at	chromosome 12 open reading frame 30
METTL2B	0.0006227	0.0158797	16.0505	8.17149	7.69386	-2.08614	9.39596	10.0954	9.86795	-1.62652	222276_at	methyltransferase like 2B
GPRASP1	1.23e-05	0.0008083	15.5683	7.68957	8.44527	-1.84343	8.64798	10.6205	9.57091	-1.62662	204793_at	G protein-coupled receptor associated sorting protein 1
DENND2D	2e-07	3.18e-05	361.116	87.4864	130.551	-2.76609	188.717	227.664	221.875	-1.62757	221081_s_at	DENN/MADD domain containing 2D
LRCH3	0.0004212	0.0121526	147.733	90.5565	70.5698	-2.09344	103.814	105.449	90.7446	-1.62801	228119_at	leucine-rich repeats and calponin homology (CH) domain containing 3
KLRK1	< 1e-07	< 1e-07	338.71	32.267	80.487	-4.20826	159.839	226.409	207.975	-1.62861	205821_at	killer cell lectin-like receptor subfamily K, member 1
SEPW1	2.68e-05	0.0014624	861.185	481.157	444.37	-1.93799	545.831	546.909	528.414	-1.62975	1555851_s_at	selenoprotein W, 1
RBM4	0.0005103	0.0139434	184.899	101.101	88.6538	-2.08563	104.804	106.616	113.419	-1.63024	239635_at	RNA binding motif protein 4
NA	1.68e-05	0.0010229	42.2608	20.7029	16.3565	-2.58373	18.008	19.9399	25.9128	-1.63088	1557555_at	NA
SETD6	1.2e-06	0.0001361	22.3085	10.4833	10.6019	-2.1042	12.6672	13.6173	13.6772	-1.63107	219751_at	SET domain containing 6
COG1	0.0005266	0.0142182	86.662	45.5529	57.8151	-1.49895	58.6108	51.4924	53.1246	-1.6313	227784_s_at	component of oligomeric golgi complex 1
CROCC	2.23e-05	0.0012661	36.2714	19.4539	21.9217	-1.65459	21.8726	23.3864	22.2341	-1.63134	206274_s_at	ciliary rootlet coiled-coil, rootletin
AP4S1	2.21e-05	0.0012574	75.2502	39.5304	43.4973	-1.73	45.7726	52.8855	46.1237	-1.63149	235647_at	adaptor-related protein complex 4, sigma 1 subunit
CASP6	3.8e-06	0.0003277	100.942	69.8717	53.1585	-1.89889	65.8126	68.7477	61.8703	-1.63152	211464_x_at	caspase 6, apoptosis-related cysteine peptidase
HN1L	5e-07	6.78e-05	45.1739	22.2042	22.2626	-2.02914	26.6078	27.6474	27.6826	-1.63185	212109_at	hematological and neurological expressed 1-like
FBXL15	0.0007122	0.017446	125.959	104.597	69.0904	-1.82311	84.8128	81.3041	77.1569	-1.63251	218938_at	F-box and leucine-rich repeat protein 15
PDCD7	0.0004235	0.0121996	119.889	51.4373	57.3155	-2.09175	76.4156	70.3747	73.428	-1.63275	231809_x_at	programmed cell death 7
PPRC1	4.1e-06	0.0003475	53.1937	26.7001	23.9476	-2.22125	28.0361	35.8935	32.572	-1.63311	203737_s_at	peroxisome proliferator-activated receptor gamma, coactivator-related 1
RPS6	0.0002319	0.0076797	2547.97	975.27	1445.04	-1.76325	1705.5	1505.54	1559.87	-1.63345	200081_s_at	ribosomal protein S6
MSTO1	1e-07	1.75e-05	57.8246	28.9542	30.2727	-1.91012	33.9131	37.9644	35.3952	-1.63368	222584_at	misato homolog 1 (Drosophila)
TRBV7-8	0.0001916	0.0066852	18.3372	9.88024	12.6275	-1.45216	12.2481	10.6978	11.2237	-1.63379	234377_at	T cell receptor beta variable 7-8
NA	6.8e-06	0.0005178	124.57	71.8405	54.0403	-2.30513	76.29	82.7909	76.2074	-1.63462	244352_at	NA
NA	0.0002807	0.0088918	67.7792	37.5219	29.6247	-2.28793	45.803	48.7946	41.4317	-1.63592	231057_at	NA
ZNF514	0.0001046	0.0042082	53.2964	22.3881	20.2929	-2.62636	32.5226	36.0441	32.5783	-1.63595	235729_at	zinc finger protein 514
LOC642826	2.42e-05	0.0013501	17.3531	10.7082	9.88409	-1.75566	11.4589	9.9328	10.6056	-1.63622	240230_s_at	hypothetical LOC642826
NA	0.0002348	0.0077522	27.6357	16.6756	14.7508	-1.87351	14.14	16.2806	16.8895	-1.63627	242208_at	NA
SH2D3A	1.6e-05	0.0009829	47.9084	29.5234	23.7563	-2.01666	31.3918	25.9856	29.2618	-1.63723	222169_x_at	SH2 domain containing 3A
RPS28P6	2.1e-06	0.0002091	515.416	298.869	246.375	-2.092	344.463	343.184	314.706	-1.63777	216380_x_at	ribosomal protein S28 pseudogene 6
RPL22	3.8e-06	0.0003277	639.829	340.948	267.331	-2.3934	348.96	360.362	390.455	-1.63867	214042_s_at	ribosomal protein L22
KIAA1377	1.28e-05	0.0008341	12.16	7.35938	7.78824	-1.56132	8.21601	8.83478	7.41816	-1.63922	232166_at	KIAA1377
PRSS23	2.41e-05	0.0013459	19.271	8.75847	9.58851	-2.0098	9.50122	9.55746	11.7479	-1.64037	202458_at	protease, serine, 23
LOC388152	0.0009639	0.0217504	50.0332	36.7178	30.4238	-1.64454	35.7858	34.2946	30.4976	-1.64056	223326_s_at	hypothetical LOC388152
CUTA	0.0001921	0.0066941	698.415	355.455	321.225	-2.17422	439.924	384.957	425.657	-1.64079	221488_s_at	cutA divalent cation tolerance homolog (E. coli)
FANCG	2.17e-05	0.0012442	49.8103	33.6847	28.6115	-1.74092	30.1045	35.8613	30.3541	-1.64098	203564_at	Fanconi anemia, complementation group G
NA	6.73e-05	0.0030112	67.3104	33.4668	29.6224	-2.27228	41.7768	41.167	41.0135	-1.64118	1556412_at	NA
NA	0.0003307	0.0100592	10.1114	6.54748	5.74954	-1.75865	6.50504	7.45896	6.16063	-1.6413	236520_at	NA
C14orf132	0.0001759	0.0062853	16.8774	10.9763	10.848	-1.55582	11.7914	10.3991	10.2764	-1.64235	231859_at	chromosome 14 open reading frame 132
NA	0.0002367	0.0077947	62.2405	44.7972	35.536	-1.75148	44.5377	39.079	37.8814	-1.64304	240324_at	NA
NA	0.0007935	0.018822	20.5547	10.1751	10.1311	-2.02888	12.9182	13.1662	12.4974	-1.64472	232978_at	NA
C4orf30	0.0001243	0.0048336	99.9885	39.5312	44.0841	-2.26813	73.9682	59.9411	60.7885	-1.64486	219717_at	chromosome 4 open reading frame 30
NA	1.3e-06	0.0001439	79.0423	39.2787	31.8652	-2.48052	40.4647	47.2151	48.0491	-1.64503	229558_at	NA
TCF12	0.0006861	0.0169894	60.2774	28.5327	21.6269	-2.78715	35.5397	41.3466	36.6372	-1.64525	235925_at	transcription factor 12
ARL4C	0.0005947	0.0154908	68.8367	14.3486	26.9245	-2.55666	34.0962	45.697	41.8036	-1.64667	202206_at	ADP-ribosylation factor-like 4C
NA	1.7e-06	0.0001798	16.5345	8.3082	8.57767	-1.92763	9.49319	11.2245	10.0359	-1.64754	216000_at	NA
C19orf70	0.0001802	0.0063935	324.537	182.607	165.521	-1.9607	208.843	199.288	196.964	-1.6477	225823_at	chromosome 19 open reading frame 70
TBCD	0.0001574	0.0057757	121.527	77.6795	60.2827	-2.01596	63.5342	66.8865	73.7515	-1.64779	211052_s_at	tubulin folding cofactor D
TRAP1	2e-07	3.18e-05	139.318	71.5636	69.6851	-1.99925	77.8266	85.6357	84.4503	-1.6497	201391_at	TNF receptor-associated protein 1
NAT10	1e-07	1.75e-05	99.1438	47.2268	42.8939	-2.31137	49.1144	61.3129	60.0867	-1.65001	217884_at	N-acetyltransferase 10 (GCN5-related)
LOC286208	4e-07	5.79e-05	58.3604	27.3575	29.0801	-2.00688	34.3767	36.7333	35.3551	-1.65069	1560089_at	hypothetical LOC286208
NA	2.02e-05	0.0011812	69.3271	39.7176	30.3606	-2.28346	40.5643	41.8401	41.9971	-1.65076	241798_at	NA
NPAL3	4.36e-05	0.002136	41.5088	14.6286	22.2846	-1.86267	26.699	26.465	25.1331	-1.65156	225875_s_at	NIPA-like domain containing 3
MPHOSPH9	1.44e-05	0.0009091	35.5853	12.6343	13.175	-2.70097	17.8737	21.3632	21.5418	-1.65192	215731_s_at	M-phase phosphoprotein 9
RPL13A	1.16e-05	0.0007716	1897.96	747.214	832.047	-2.28107	1100.08	1165.96	1148.61	-1.6524	200715_x_at	ribosomal protein L13a
TDP1	0.0001325	0.0050838	54.4029	32.3504	27.6807	-1.96537	34.2917	36.9194	32.9087	-1.65315	226044_at	tyrosyl-DNA phosphodiesterase 1
LIN7B	0.0001546	0.0056921	13.5192	10.0388	7.84006	-1.72437	9.0606	8.79863	8.17031	-1.65467	241957_x_at	lin-7 homolog B (C. elegans)
GNLY	4.45e-05	0.0021627	1404.15	158.49	395.022	-3.55461	694.683	1000.63	848.246	-1.65536	37145_at	granulysin
RSU1	0.0007333	0.0178271	105.915	75.9766	57.1236	-1.85414	69.4273	54.5337	63.9653	-1.65582	215618_at	Ras suppressor protein 1
EOMES	< 1e-07	< 1e-07	380.178	37.7655	89.2454	-4.25991	166.719	233.123	229.43	-1.65706	231776_at	eomesodermin homolog (Xenopus laevis)
IFFO2	< 1e-07	< 1e-07	75.9165	30.9724	32.969	-2.30266	40.0185	45.5811	45.7793	-1.65831	225615_at	intermediate filament family orphan 2
LAT	8.1e-06	0.0005929	199.66	82.1016	89.7616	-2.22434	104.786	102.258	120.383	-1.65855	209881_s_at	linker for activation of T cells
NA	5.5e-06	0.000439	12.208	7.48476	7.20064	-1.6954	6.98246	7.55256	7.35818	-1.6591	233706_at	NA
DDX18	0.0002377	0.0078102	327.541	157.311	161.365	-2.02981	202.483	218.228	197.311	-1.66003	208895_s_at	DEAD (Asp-Glu-Ala-Asp) box polypeptide 18
NA	4.35e-05	0.002136	119.029	58.003	51.0017	-2.33383	69.6759	70.5454	71.6726	-1.66073	239735_at	NA
MRPL41	0.0006509	0.0163423	172.108	121.172	85.9203	-2.00311	109.349	94.5629	103.597	-1.66132	225425_s_at	mitochondrial ribosomal protein L41
ZNF831	2.33e-05	0.0013147	22.3346	6.82901	8.20731	-2.7213	10.5796	12.6296	13.4407	-1.66171	1558827_a_at	zinc finger protein 831
RPL3	2.1e-06	0.0002091	4766.03	2133.42	2232.67	-2.13467	2976.43	2752.02	2867.38	-1.66215	201217_x_at	ribosomal protein L3
CLEC3B	1.6e-06	0.0001712	94.6956	46.9104	46.981	-2.01561	64.2219	60.8511	56.9659	-1.66232	212627_s_at	C-type lectin domain family 3, member B
WDR6	1e-06	0.0001186	264.151	160.58	129.103	-2.04605	151.815	178.355	158.736	-1.66409	217734_s_at	WD repeat domain 6
PPP1R13B	4e-07	5.79e-05	46.3397	25.4111	22.6227	-2.04837	28.3267	27.8786	27.8413	-1.66442	216347_s_at	protein phosphatase 1, regulatory (inhibitor) subunit 13B
NSUN5C	1e-07	1.75e-05	293.177	189.611	146.702	-1.99846	173.353	177.809	176.138	-1.66447	213842_x_at	NOL1/NOP2/Sun domain family, member 5C
OSGEPL1	6.59e-05	0.0029533	27.5653	13.1436	12.7426	-2.16324	15.0035	18.045	16.5598	-1.66459	230032_at	O-sialoglycoprotein endopeptidase-like 1
LOC91316	4.73e-05	0.0022665	431.078	335.289	244.978	-1.75966	259.37	266.605	258.892	-1.66509	213502_x_at	glucuronidase, beta/ immunoglobulin lambda-like polypeptide 1 pseudogene
SH2D2A	1e-07	1.75e-05	94.2491	23.4818	37.1904	-2.53423	42.3091	53.4473	56.5895	-1.66549	207351_s_at	SH2 domain protein 2A
RPL3	3e-06	0.0002711	4734.51	2116.18	2204.67	-2.14749	2951.04	2749.87	2841.57	-1.66616	211073_x_at	ribosomal protein L3
C2orf43	0.0005983	0.0155254	52.6667	30.546	25.9924	-2.02623	30.4588	31.4268	31.6006	-1.66663	222193_at	chromosome 2 open reading frame 43
FAM113A	5.4e-06	0.0004355	126.437	67.7301	52.5599	-2.40558	68.2079	72.7835	75.8534	-1.66686	225505_s_at	family with sequence similarity 113, member A
KRI1	< 1e-07	< 1e-07	90.7584	34.918	38.7319	-2.34325	52.2069	59.2236	54.4483	-1.66687	227587_at	KRI1 homolog (S. cerevisiae)
RNF165	0.0004068	0.0118056	9.52863	3.94488	4.36574	-2.18259	5.40433	5.83912	5.71627	-1.66693	1557545_s_at	ring finger protein 165
RPS5	1.87e-05	0.001115	2490.47	1087.31	1242.98	-2.00363	1693.85	1459.47	1493.91	-1.66709	200024_at	ribosomal protein S5
SOCS7	5.58e-05	0.0025877	93.2104	52.8836	47.6482	-1.95622	50.7866	64.6679	55.8402	-1.66923	226572_at	suppressor of cytokine signaling 7
SNORD22	1e-07	1.75e-05	234.166	76.4152	88.1825	-2.65547	120.43	149.638	140.242	-1.66973	224610_at	small nucleolar RNA, C/D box 22
SNRPN	0.000501	0.0137788	410.572	191.614	250.392	-1.63972	290.86	270.686	245.884	-1.66978	201522_x_at	small nuclear ribonucleoprotein polypeptide N
MEI1	2e-07	3.18e-05	100.018	58.2224	43.6307	-2.29238	51.9019	57.9833	59.8984	-1.66979	230011_at	meiosis inhibitor 1
SNHG12	4.1e-06	0.0003475	34.5876	14.9932	19.6702	-1.75838	20.0961	20.2171	20.713	-1.66985	228990_at	small nucleolar RNA host gene 12 (non-protein coding)
RABEP2	0.0002209	0.0074084	149.08	90.7873	61.8306	-2.4111	80.2109	94.226	89.2694	-1.67	74694_s_at	rabaptin, RAB GTPase binding effector protein 2
RPL14	0.0001581	0.0057934	1934.33	784.388	948.919	-2.03846	1180.59	1241.15	1158.05	-1.67034	200074_s_at	ribosomal protein L14
TRGV9	7e-07	8.86e-05	276.225	30.3292	80.4108	-3.43517	123.078	199.072	165.368	-1.67036	209813_x_at	T cell receptor gamma variable 9
LOC100132218	0.0002421	0.0079168	144.13	45.019	51.6534	-2.79032	95.0366	113.242	86.2413	-1.67124	230653_at	hypothetical protein LOC100132218
TNRC6A	3.77e-05	0.001921	175.556	92.0393	92.9916	-1.88787	102.89	118.424	104.958	-1.67263	234734_s_at	trinucleotide repeat containing 6A
TMC6	2e-05	0.0011745	346.64	191.474	184.463	-1.87919	197.13	207.266	207.045	-1.67423	204328_at	transmembrane channel-like 6
MRPS2	0.0003774	0.0111356	51.5705	25.906	27.29	-1.88972	26.1757	33.5552	30.7749	-1.67573	218001_at	mitochondrial ribosomal protein S2
PRIM1	0.0009984	0.0223079	31.0341	13.8822	14.9969	-2.06937	18.7996	20.3732	18.5168	-1.676	205053_at	primase, DNA, polypeptide 1 (49kDa)
NA	0.0002674	0.0085498	30.5213	19.0495	15.4341	-1.97753	16.147	17.4847	18.2085	-1.67622	215525_at	NA
NA	7.7e-06	0.0005697	9.13595	4.07619	4.30512	-2.12211	5.21986	5.03346	5.4491	-1.6766	243996_at	NA
ICT1	0.0002115	0.0071959	104.888	57.7211	51.6643	-2.03019	66.2357	66.4351	62.5548	-1.67674	204868_at	immature colon carcinoma transcript 1
GLTSCR2	6e-07	7.94e-05	5096.99	2264.84	2093.87	-2.43424	2934.31	2900.54	3038.55	-1.67744	217807_s_at	glioma tumor suppressor candidate region gene 2
NA	4.9e-06	0.0004035	10.0525	6.1319	5.96967	-1.68393	6.38657	5.93684	5.99104	-1.67793	1554964_x_at	NA
NA	1.03e-05	0.0007093	34.4374	15.346	13.7582	-2.50305	16.7265	21.8027	20.5092	-1.67912	230843_at	NA
NA	0.0001256	0.0048712	198.984	116.79	102.452	-1.94222	132.171	121.495	118.484	-1.67942	236754_at	NA
AFG3L2	0.0003308	0.0100592	48.9652	34.6794	25.1355	-1.94805	28.3037	28.196	29.1446	-1.68008	232919_at	AFG3 ATPase family gene 3-like 2 (yeast)
ATRIP	7.6e-06	0.0005638	35.7942	23.8478	21.1895	-1.68925	24.1532	22.2714	21.303	-1.68024	1552937_s_at	ATR interacting protein
MGC12488	8.05e-05	0.0034656	35.9967	20.5851	20.7351	-1.73602	21.7812	19.254	21.4233	-1.68026	211386_at	hypothetical protein MGC12488
NPM1	1.9e-06	0.0001953	199.648	77.9537	77.2739	-2.58365	99.4117	110.881	118.809	-1.68041	221923_s_at	nucleophosmin (nucleolar phosphoprotein B23, numatrin)
LMO7	0.0002171	0.0073079	17.4241	9.77972	8.92788	-1.95165	10.5427	10.6826	10.3671	-1.68072	242722_at	LIM domain 7
RPL3P7	6.9e-06	0.0005247	3179.77	1476.73	1492.45	-2.13058	1987.12	1813.95	1891.84	-1.68078	215963_x_at	ribosomal protein L3 pseudogene 7
OBSCN	2.2e-06	0.0002156	13.6922	10.3956	9.5159	-1.43887	9.24529	8.95467	8.14483	-1.68108	233029_at	obscurin, cytoskeletal calmodulin and titin-interacting RhoGEF
SDR39U1	1.4e-06	0.0001525	170.226	86.6784	75.1834	-2.26414	97.0382	115.462	101.2	-1.68208	213398_s_at	short chain dehydrogenase/reductase family 39U, member 1
PERLD1	2.8e-06	0.0002582	81.571	45.0307	39.5884	-2.06047	43.7932	48.5492	48.4757	-1.68272	55616_at	per1-like domain containing 1
LY9	0.0001741	0.006246	130.013	41.6565	71.1822	-1.82648	97.2414	73.8546	77.2489	-1.68304	215967_s_at	lymphocyte antigen 9
PPAT	0.0002918	0.0091638	29.9152	13.6767	14.0352	-2.13144	18.9983	15.8868	17.7739	-1.68309	209433_s_at	phosphoribosyl pyrophosphate amidotransferase
NA	3.71e-05	0.0018975	146.515	111.58	75.1991	-1.94836	80.6891	84.8918	87.039	-1.68333	81811_at	NA
LMLN	4.5e-05	0.0021831	20.1791	10.5718	12.6372	-1.5968	11.06	14.5843	11.9807	-1.6843	244881_at	leishmanolysin-like (metallopeptidase M8 family)
LIG1	1e-07	1.75e-05	74.0675	45.3112	40.4656	-1.83038	47.4504	48.9847	43.9586	-1.68494	202726_at	ligase I, DNA, ATP-dependent
38601	5e-07	6.78e-05	505.12	187.858	187.442	-2.69481	261.035	289.031	299.719	-1.68531	212414_s_at	septin 6
NA	0.0006883	0.0170207	438.578	410.123	258.823	-1.69451	305.371	268.847	260.205	-1.68551	239409_at	NA
STAG3L2	4.48e-05	0.0021753	82.8091	52.0242	43.7517	-1.89271	53.3922	43.1275	49.1257	-1.68566	235263_at	stromal antigen 3-like 2
ATIC	1.16e-05	0.0007716	167.932	60.4081	71.5368	-2.34749	89.0601	104.287	99.6127	-1.68584	208758_at	5-aminoimidazole-4-carboxamide ribonucleotide formyltransferase/IMP cyclohydrolase
C16orf88	0.0002797	0.0088653	87.6787	50.9739	48.4079	-1.81125	51.9308	51.109	51.9787	-1.68682	213235_at	chromosome 16 open reading frame 88
FAM162A	0.0001497	0.0055679	165.526	59.0541	73.8397	-2.2417	89.3098	95.6834	98.1059	-1.68722	224345_x_at	family with sequence similarity 162, member A
METTL8	4.02e-05	0.0020146	43.5479	20.579	19.2751	-2.25929	25.9156	24.1162	25.8091	-1.68731	220007_at	methyltransferase like 8
RORA	4e-07	5.79e-05	60.9252	5.09659	13.8242	-4.40716	26.0089	36.8769	36.1059	-1.6874	226682_at	RAR-related orphan receptor A
NA	6.07e-05	0.0027702	31.3588	9.92741	10.3853	-3.01952	18.2457	20.2287	18.5571	-1.68986	233799_at	NA
ENOSF1	0.0002357	0.0077726	27.8859	8.02557	13.9444	-1.99979	14.1736	14.9535	16.4928	-1.69079	204143_s_at	enolase superfamily member 1
PRKCQ	< 1e-07	< 1e-07	92.8496	15.4731	33.4901	-2.77245	41.1315	47.9487	54.8951	-1.6914	210038_at	protein kinase C, theta
LOC285014	0.0004316	0.01238	51.9842	29.9747	27.0703	-1.92034	32.9959	32.5129	30.7139	-1.69253	235418_at	hypothetical protein LOC285014
RARRES3	1.61e-05	0.000988	1050.01	435.724	355.063	-2.95724	526.037	527.008	620.364	-1.69256	204070_at	retinoic acid receptor responder (tazarotene induced) 3
GNLY	3.69e-05	0.0018908	1293.58	147.615	354.06	-3.65357	618.022	881.428	763.925	-1.69334	205495_s_at	granulysin
TRAPPC2L	0.0008553	0.0199248	235.487	154.958	137.087	-1.71779	151.424	136.557	139.001	-1.69413	218354_at	trafficking protein particle complex 2-like
PRPS1	0.0002484	0.0080793	24.3336	13.7593	17.3156	-1.4053	16.4256	12.5776	14.3588	-1.69468	208447_s_at	phosphoribosyl pyrophosphate synthetase 1
ITPR3	< 1e-07	< 1e-07	87.4146	31.0335	31.865	-2.74328	42.1304	58.4801	51.5734	-1.69495	201189_s_at	inositol 1,4,5-triphosphate receptor, type 3
NA	0.0007243	0.017687	22.3966	13.5376	13.3188	-1.68158	14.9461	14.7735	13.2112	-1.69528	1569930_at	NA
NA	0.0002716	0.0086688	18.2442	9.55152	9.21225	-1.98043	11.5506	9.5157	10.755	-1.69634	236595_at	NA
LOC100132999	4.38e-05	0.0021401	143.078	127.342	75.4803	-1.89557	101.799	100.131	84.3224	-1.6968	229264_at	hypothetical protein LOC100132999
HEXA	0.000647	0.0162967	96.6462	55.6148	49.2371	-1.96287	56.029	59.936	56.9207	-1.69791	215155_at	hexosaminidase A (alpha polypeptide)
RPS16	2.2e-06	0.0002156	2693.05	1177.36	1247.23	-2.15923	1648.05	1624.65	1585.76	-1.69827	201258_at	ribosomal protein S16
METT10D	< 1e-07	< 1e-07	127.906	52.9222	57.6903	-2.21712	67.5577	76.7952	75.2765	-1.69916	226744_at	methyltransferase 10 domain containing
POLRMT	1.47e-05	0.0009217	93.0347	47.0589	42.4867	-2.18974	50.7425	61.6749	54.7067	-1.70061	203782_s_at	polymerase (RNA) mitochondrial (DNA directed)
CUL9	6.01e-05	0.0027475	103.916	74.751	57.195	-1.81688	60.0646	56.9242	61.1026	-1.70068	213204_at	cullin 9
ZNF512B	3.8e-06	0.0003277	27.5656	15.4063	16.5408	-1.66652	16.0912	17.5039	16.2035	-1.70121	55872_at	zinc finger protein 512B
NA	0.0003364	0.0101898	62.1666	35.6675	35.5268	-1.74985	39.3574	36.7697	36.5285	-1.70187	232447_at	NA
TLE2	5e-07	6.78e-05	26.5331	15.1197	15.1073	-1.75631	16.564	16.6794	15.5894	-1.70199	40837_at	transducin-like enhancer of split 2 (E(sp1) homolog, Drosophila)
PEBP1	3.12e-05	0.0016466	182.877	72.6322	77.524	-2.35898	95.0754	115.951	107.442	-1.70211	210825_s_at	phosphatidylethanolamine binding protein 1
CSNK1E	1e-07	1.75e-05	61.0395	31.5803	31.7991	-1.91954	32.9869	35.3077	35.8591	-1.7022	226858_at	casein kinase 1, epsilon
NA	0.0008684	0.02011	18.4283	14.2815	12.1487	-1.51689	14.1017	12.7054	10.8141	-1.70409	229423_at	NA
GPR183	1.31e-05	0.0008446	58.8124	11.6917	24.4221	-2.40816	31.966	34.4933	34.5022	-1.7046	205419_at	G protein-coupled receptor 183
GRAMD3	< 1e-07	< 1e-07	11.939	5.23411	5.91194	-2.01946	7.47446	6.47994	7.00311	-1.70481	238049_at	GRAM domain containing 3
CACNA1D	0.0004875	0.0134957	15.2579	17.9652	12.9364	-1.17946	12.8929	9.79423	8.94824	-1.70513	243334_at	calcium channel, voltage-dependent, L type, alpha 1D subunit
GRAP	0.0001231	0.0048006	142.202	91.7703	74.2165	-1.91604	85.7092	89.5222	83.3868	-1.70533	229726_at	GRB2-related adaptor protein
CHCHD6	3.81e-05	0.0019342	29.4042	17.4035	16.7429	-1.75622	19.1882	17.3642	17.2408	-1.7055	224462_s_at	coiled-coil-helix-coiled-coil-helix domain containing 6
SYTL2	1e-07	1.75e-05	12.5171	4.75486	5.74965	-2.17702	7.0517	7.54222	7.33834	-1.70571	220613_s_at	synaptotagmin-like 2
VPRBP	1e-07	1.75e-05	19.138	11.1481	9.72228	-1.96847	11.7865	10.0401	11.2163	-1.70626	204376_at	Vpr (HIV-1) binding protein
TCOF1	7.1e-06	0.0005362	81.166	49.9622	42.2182	-1.92253	49.6485	43.2336	47.5658	-1.70639	202384_s_at	Treacher Collins-Franceschetti syndrome 1
C3orf31	1e-07	1.75e-05	21.9531	9.68	11.1041	-1.97704	12.5765	13.9099	12.8634	-1.70664	231958_at	chromosome 3 open reading frame 31
BIN1	4.9e-06	0.0004035	110.88	51.2389	56.5087	-1.96218	64.6613	67.9123	64.9676	-1.7067	214643_x_at	bridging integrator 1
BDP1	1.39e-05	0.0008827	12.21	8.43027	6.91127	-1.76669	8.0852	7.74777	7.15266	-1.70706	231939_s_at	B double prime 1, subunit of RNA polymerase III transcription initiation factor IIIB
TRGC2	1.8e-06	0.0001867	272.092	31.1835	79.4518	-3.42461	123.852	183.437	159.377	-1.70722	215806_x_at	T cell receptor gamma constant 2
NA	7.29e-05	0.0032066	68.715	31.2983	27.4171	-2.50628	38.022	47.644	40.2436	-1.70748	235152_at	NA
FYN	7e-07	8.86e-05	994.626	381.671	417.189	-2.38411	471	614.447	582.457	-1.70764	210105_s_at	FYN oncogene related to SRC, FGR, YES
KIFC2	2e-07	3.18e-05	39.033	19.8957	20.0635	-1.94548	20.4107	23.1483	22.8569	-1.70771	226791_at	kinesin family member C2
EHMT2	2.51e-05	0.0013932	80.6902	39.2281	38.996	-2.06919	44.5613	48.3527	47.2193	-1.70884	202326_at	euchromatic histone-lysine N-methyltransferase 2
TNIK	0.0001641	0.0059576	21.2487	9.64878	11.4062	-1.86291	10.3235	10.9604	12.4343	-1.70888	213109_at	TRAF2 and NCK interacting kinase
OCM2	0.0007328	0.0178229	21.5088	14.8665	12.5842	-1.70919	12.8434	11.4725	12.5848	-1.70911	207944_at	oncomodulin 2
FAM62B	6e-06	0.00047	277.522	108.942	113.631	-2.44231	149.83	176.677	162.291	-1.71002	224698_at	family with sequence similarity 62 (C2 domain containing) member B
NA	0.0001633	0.0059365	115.505	67.4474	54.3857	-2.12381	62.4432	61.8605	67.534	-1.71033	233313_at	NA
NA	0.0003652	0.0108755	23.6232	11.1582	11.4053	-2.07125	14.9572	15.6687	13.7952	-1.71242	242759_at	NA
TRIM73	5.5e-06	0.000439	144.574	75.2091	66.5769	-2.17153	77.1301	85.7009	84.3784	-1.7134	1554250_s_at	tripartite motif-containing 73
DDX51	0.0003501	0.0105059	34.626	19.4756	19.2325	-1.80039	21.3552	21.9877	20.2055	-1.7137	1554085_at	DEAD (Asp-Glu-Ala-Asp) box polypeptide 51
GADD45GIP1	0.0005245	0.0141755	90.5357	53.3366	47.6038	-1.90186	61.0636	50.4659	52.7886	-1.71506	212891_s_at	growth arrest and DNA-damage-inducible, gamma interacting protein 1
SSSCA1	0.000492	0.0135996	104.638	72.7851	62.1297	-1.68419	71.8578	67.708	61.008	-1.71516	203114_at	Sjogren syndrome/scleroderma autoantigen 1
NA	0.0003975	0.0116159	8.78847	5.0129	5.4937	-1.59974	5.42222	5.72709	5.12398	-1.71517	222180_at	NA
LOC100128570	0.0001823	0.0064471	43.3015	22.4785	23.383	-1.85184	25.5038	21.5723	25.243	-1.71539	215140_at	hypothetical protein LOC100128570
LOC154761	3.4e-06	0.0003003	59.8875	22.3079	26.6152	-2.25013	35.2522	35.3818	34.8886	-1.71654	227868_at	hypothetical LOC154761
MYST4	0.0007512	0.0181493	134.75	50.9052	53.7283	-2.50799	71.2995	79.1637	78.494	-1.71669	212462_at	MYST histone acetyltransferase (monocytic leukemia) 4
HIP1R	0.0009974	0.0222947	57.8693	30.4687	27.8086	-2.08098	33.5025	41.0761	33.698	-1.71729	209558_s_at	huntingtin interacting protein 1 related
PRDM15	3e-07	4.57e-05	83.8658	46.6775	37.9063	-2.21245	43.3887	52.5955	48.8338	-1.71737	230777_s_at	PR domain containing 15
MRPL9	3.1e-06	0.0002779	202.337	67.0522	79.7874	-2.53596	98.978	124.925	117.791	-1.71776	209609_s_at	mitochondrial ribosomal protein L9
NA	0.0001084	0.004342	32.5718	12.8645	11.7544	-2.77103	19.0073	23.6014	18.952	-1.71865	244347_at	NA
RPL3	2e-06	0.0002025	4893.19	2213.64	2300.86	-2.12668	3019.27	2887.09	2845.77	-1.71946	212039_x_at	ribosomal protein L3
NA	8.7e-06	0.0006275	17.6449	9.99131	8.46656	-2.08407	11.1993	11.3644	10.2608	-1.71963	239668_at	NA
NA	0.0001691	0.0060982	246.241	102.579	92.8233	-2.65279	160.287	170.017	143.194	-1.71963	239285_at	NA
NA	0.0006012	0.0155602	228.223	97.6274	99.3533	-2.29708	125.026	131.823	132.627	-1.72079	226347_at	NA
MTP18	1e-06	0.0001186	79.3208	42.1463	37.9807	-2.08845	44.6757	45.7148	46.0897	-1.72101	223172_s_at	mitochondrial protein 18 kDa
DGCR6	0.0001088	0.0043548	250.227	144.109	145.267	-1.72254	174.316	151.35	145.348	-1.72158	208024_s_at	DiGeorge syndrome critical region gene 6
PPIE	6.3e-06	0.0004865	91.9524	42.2156	43.7037	-2.104	53.231	54.1881	53.4092	-1.72166	210502_s_at	peptidylprolyl isomerase E (cyclophilin E)
NA	0.0005636	0.0148845	72.1677	38.3494	37.6236	-1.91815	51.7592	45.3879	41.9154	-1.72175	242494_at	NA
NA	5e-07	6.78e-05	11.5463	6.77095	6.29574	-1.83398	7.47554	7.85533	6.70584	-1.72182	1558987_at	NA
CHMP7	1e-07	1.75e-05	214.11	124.216	98.1571	-2.1813	132.144	128.599	124.324	-1.7222	212313_at	CHMP family, member 7
KIR2DS2	0.0002092	0.0071488	27.2473	11.2032	13.6901	-1.99029	13.8972	16.7504	15.8181	-1.72254	211532_x_at	killer cell immunoglobulin-like receptor, two domains, short cytoplasmic tail, 2
NA	5e-07	6.78e-05	76.3809	31.6512	22.9009	-3.33528	43.9424	42.7803	44.3377	-1.72271	215385_at	NA
DBT	0.0004663	0.0130906	77.9177	42.628	33.0129	-2.36022	47.022	45.435	45.2009	-1.72381	244687_at	dihydrolipoamide branched chain transacylase E2
RPSA	1.33e-05	0.0008525	3642.34	1491.59	1591.19	-2.28907	2255.09	2164.2	2112.11	-1.7245	213801_x_at	ribosomal protein SA
C21orf2	0.0001101	0.004394	67.975	41.197	35.6657	-1.90589	38.4311	38.2036	39.4155	-1.72457	203994_s_at	chromosome 21 open reading frame 2
TARP	3.4e-06	0.0003003	274.817	36.0705	79.6267	-3.45132	126.205	194.664	159.341	-1.72471	211144_x_at	TCR gamma alternate reading frame protein
SLC26A7	1e-07	1.75e-05	32.5659	14.5283	13.9519	-2.33415	18.0716	21.37	18.8732	-1.72551	238214_at	solute carrier family 26, member 7
NA	0.0002762	0.0087849	20.1746	8.44787	9.94498	-2.02862	9.96501	9.46245	11.6912	-1.72562	240102_at	NA
PCSK7	< 1e-07	< 1e-07	270.849	126.414	129.832	-2.08616	151.854	169.755	156.941	-1.72581	203118_at	proprotein convertase subtilisin/kexin type 7
ANK3	4.6e-06	0.0003857	11.8564	4.2247	4.54903	-2.60636	5.29225	5.84691	6.86996	-1.72583	206385_s_at	ankyrin 3, node of Ranvier (ankyrin G)
RPL14	1.2e-06	0.0001361	4118.14	2012.43	1840.22	-2.23786	2325.05	2450.89	2385.57	-1.72627	213588_x_at	ribosomal protein L14
NA	0.0001702	0.0061262	39.3307	31.0518	23.5262	-1.67178	23.2532	21.2974	22.7794	-1.72659	232784_at	NA
NA	3.96e-05	0.0019864	35.2772	18.9796	17.6087	-2.00339	20.8285	21.6079	20.4296	-1.72677	236210_at	NA
KRR1	7.1e-06	0.0005362	120.951	63.5313	51.2779	-2.35874	69.2102	74.1048	70.0427	-1.72683	232441_at	KRR1, small subunit (SSU) processome component, homolog (yeast)
ZNF286A	1e-07	1.75e-05	30.9809	14.1727	11.6563	-2.65787	17.7398	19.5832	17.9315	-1.72774	1557684_at	zinc finger protein 286A
TTC38	1e-07	1.75e-05	246.014	122.068	105.895	-2.3232	136.893	153.917	142.371	-1.72798	218272_at	tetratricopeptide repeat domain 38
INADL	6.2e-06	0.0004815	6.94027	3.25788	3.41658	-2.03135	4.12559	4.70833	4.01597	-1.72817	214705_at	InaD-like (Drosophila)
LOC153682	1e-07	1.75e-05	22.2967	10.3403	7.94294	-2.80711	11.8574	13.6552	12.9011	-1.72828	232794_at	hypothetical protein LOC153682
NA	0.0002048	0.0070468	44.5645	18.2158	18.6659	-2.38747	26.9792	28.4551	25.7697	-1.72934	1557835_at	NA
LEF1	1.3e-06	0.0001439	8.96174	4.48682	4.62315	-1.93845	5.25212	5.34388	5.1809	-1.72976	210948_s_at	lymphoid enhancer-binding factor 1
C16orf52	3.89e-05	0.0019639	280.199	151.213	123.075	-2.27666	165.908	169.894	161.986	-1.72977	230296_at	chromosome 16 open reading frame 52
NA	8.78e-05	0.0036842	45.2734	17.7907	20.3894	-2.22044	27.0702	32.1495	26.1722	-1.72983	239451_at	NA
MAK10	3.6e-06	0.0003149	109.655	51.4221	52.4403	-2.09105	65.2225	63.8792	63.3874	-1.72992	220925_at	MAK10 homolog, amino-acid N-acetyltransferase subunit (S. cerevisiae)
VARS2	3.82e-05	0.0019357	68.4056	41.7196	32.0159	-2.13662	37.3843	37.965	39.5404	-1.73002	226200_at	valyl-tRNA synthetase 2, mitochondrial (putative)
GTPBP6	0.0002552	0.0082514	148.269	82.037	72.624	-2.0416	84.0747	93.679	85.6926	-1.73024	203314_at	GTP binding protein 6 (putative)
OCIAD2	< 1e-07	< 1e-07	135.277	45.9078	55.2354	-2.4491	79.2145	81.9326	78.1687	-1.73058	225314_at	OCIA domain containing 2
MED6	0.0001164	0.0046151	56.3255	34.7412	21.6687	-2.59939	36.6042	43.4366	32.5378	-1.73108	207078_at	mediator complex subunit 6
TXK	4.96e-05	0.0023479	30.1256	5.24654	13.3675	-2.25364	15.0299	15.7681	17.3981	-1.73155	206828_at	TXK tyrosine kinase
NA	2.4e-06	0.0002294	15.9324	7.181	6.89333	-2.31127	9.85543	8.708	9.20008	-1.73176	1562938_at	NA
IL11RA	< 1e-07	< 1e-07	40.7301	16.5221	16.7226	-2.43563	19.9549	24.5671	23.5076	-1.73263	204773_at	interleukin 11 receptor, alpha
NCRNA00107	0.000425	0.0122299	125.108	91.1098	70.0194	-1.78676	80.0124	84.8217	72.1984	-1.73284	232463_at	non-protein coding RNA 107
LUC7L	2.72e-05	0.0014754	75.7618	40.0284	43.4932	-1.74193	46.2912	44.0147	43.7083	-1.73335	223546_x_at	LUC7-like (S. cerevisiae)
ARL4C	< 1e-07	< 1e-07	418.903	40.6737	105.646	-3.96514	193.025	243.143	241.606	-1.73382	202207_at	ADP-ribosylation factor-like 4C
PPM1K	0.0003299	0.0100486	22.5756	11.8723	10.6891	-2.11203	15.6501	14.3656	13.0206	-1.73384	244011_at	protein phosphatase 1K (PP2C domain containing)
SIGIRR	2.53e-05	0.0014029	393.117	152.885	165.223	-2.37931	198.397	221.506	226.504	-1.73559	52940_at	single immunoglobulin and toll-interleukin 1 receptor (TIR) domain
C14orf1	1.1e-06	0.0001266	74.8449	39.3096	34.4462	-2.1728	43.5798	43.1567	43.1212	-1.73569	202562_s_at	chromosome 14 open reading frame 1
ENOSF1	3.07e-05	0.0016281	37.22	13.4718	18.528	-2.00885	18.9968	22.1615	21.4389	-1.7361	213645_at	enolase superfamily member 1
GLMN	0.0001394	0.0052636	36.1507	16.8744	14.5636	-2.48226	18.7897	19.6112	20.8019	-1.73785	237388_at	glomulin, FKBP associated protein
FKBP11	< 1e-07	< 1e-07	305.186	113.489	118.486	-2.57571	154.48	170.248	175.604	-1.73792	219117_s_at	FK506 binding protein 11, 19 kDa
NA	1.4e-06	0.0001525	14.9818	7.56947	7.04422	-2.12682	8.79012	8.84589	8.61956	-1.73812	244226_s_at	NA
THAP7	0.0001893	0.0066219	63.3509	39.8545	34.8373	-1.81848	41.2966	40.3118	36.4191	-1.7395	218492_s_at	THAP domain containing 7
VSIG1	< 1e-07	< 1e-07	8.51235	3.79879	4.04644	-2.10366	4.64861	5.21629	4.89114	-1.74036	243764_at	V-set and immunoglobulin domain containing 1
NA	7.77e-05	0.0033636	17.39	9.51165	7.35556	-2.3642	10.3664	9.79063	9.98818	-1.74106	236969_at	NA
NA	0.0003184	0.0098021	13.1882	7.81566	6.64287	-1.98532	7.48129	8.22707	7.57405	-1.74124	1561092_at	NA
OSBPL7	< 1e-07	< 1e-07	62.9895	25.804	25.3577	-2.48404	32.1296	31.4081	36.1507	-1.74241	227946_at	oxysterol binding protein-like 7
TTC39C	9.2e-06	0.0006499	94.2156	35.7579	35.5838	-2.64771	51.9009	52.4643	54.0702	-1.74247	238480_at	tetratricopeptide repeat domain 39C
S1PR5	8.84e-05	0.0037008	103.224	22.922	36.2327	-2.84892	43.6493	58.3653	59.2052	-1.7435	230464_at	sphingosine-1-phosphate receptor 5
SFI1	8.7e-06	0.0006275	118.354	62.2056	61.2214	-1.93321	68.4919	73.2625	67.8418	-1.74455	36545_s_at	Sfi1 homolog, spindle assembly associated (yeast)
SLAMF6	1e-07	1.75e-05	185.275	48.1399	66.1105	-2.8025	96.2433	114.436	106.19	-1.74474	1552497_a_at	SLAM family member 6
EPHA1	0.0001132	0.004498	21.2631	13.68	13.04	-1.63061	14.1362	15.0268	12.1864	-1.74482	205977_s_at	EPH receptor A1
IMPDH2	0.0005374	0.0144014	273.513	125.503	118.421	-2.30967	156.684	153.149	156.637	-1.74616	201892_s_at	IMP (inosine monophosphate) dehydrogenase 2
CD96	5.4e-06	0.0004355	48.6538	11.9048	20.5722	-2.36503	22.9256	30.8089	27.8274	-1.74841	206761_at	CD96 molecule
NA	0.0001987	0.0068803	154.74	79.9614	61.6544	-2.5098	87.6293	96.0601	88.4829	-1.74881	243286_at	NA
GTPBP8	0.0001877	0.0065827	123.083	69.176	61.4581	-2.00272	74.8189	71.9758	70.3766	-1.74892	221046_s_at	GTP-binding protein 8 (putative)
NA	0.0003056	0.0094667	14.2159	7.48896	7.48525	-1.89919	7.62299	8.46102	8.12516	-1.74962	239649_at	NA
NSMCE1	0.000191	0.0066728	339.003	225.209	170.188	-1.99193	212.33	199.392	193.723	-1.74994	224666_at	non-SMC element 1 homolog (S. cerevisiae)
MUC20	0.0007512	0.0181493	11.8401	6.89808	6.40299	-1.84916	6.98682	6.24631	6.76373	-1.75053	231941_s_at	mucin 20, cell surface associated
FEZ1	0.0003762	0.0111122	17.6941	7.36391	9.24385	-1.91415	11.0808	12.0624	10.103	-1.75137	203562_at	fasciculation and elongation protein zeta 1 (zygin I)
ZNF589	2.02e-05	0.0011812	122.024	67.0427	55.6243	-2.19372	67.9428	84.2453	69.6122	-1.75292	219968_at	zinc finger protein 589
PRF1	5e-07	6.78e-05	779.463	82.6202	200.614	-3.88538	300.518	438.331	444.613	-1.75313	214617_at	perforin 1 (pore forming protein)
NA	7e-07	8.86e-05	21.4057	7.52203	8.19397	-2.61237	13.4794	13.3422	12.2076	-1.75347	232161_x_at	NA
NUP210	< 1e-07	< 1e-07	190.065	77.4816	73.9146	-2.57142	95.4453	124.17	108.366	-1.75393	213947_s_at	nucleoporin 210kDa
ZNF677	0.0001859	0.0065322	37.8675	17.8388	14.732	-2.57042	26.9997	24.749	21.5874	-1.75415	1560562_a_at	zinc finger protein 677
TSPYL2	7.45e-05	0.0032534	133.872	73.0428	70.679	-1.89408	75.2174	78.9367	76.3067	-1.75439	218012_at	TSPY-like 2
ZNF91	< 1e-07	< 1e-07	229.908	47.0617	76.6812	-2.99823	140.769	140.706	130.985	-1.75522	206059_at	zinc finger protein 91
MRPL41	1.9e-05	0.0011279	314.763	191.828	159.713	-1.9708	190.595	181.92	179.327	-1.75525	227186_s_at	mitochondrial ribosomal protein L41
TMC8	0.0001658	0.0059994	115.258	66.5688	58.8949	-1.95701	66.1511	60.9035	65.6099	-1.75671	242644_at	transmembrane channel-like 8
NA	4.26e-05	0.0021059	47.3818	23.2141	16.8061	-2.81932	26.2684	25.8061	26.9695	-1.75686	217482_at	NA
D2HGDH	3.53e-05	0.0018294	139.446	73.276	62.3377	-2.23695	72.0121	70.2591	79.3705	-1.75691	228738_at	D-2-hydroxyglutarate dehydrogenase
SLC26A2	0.0006306	0.016014	32.1279	15.9447	14.4039	-2.2305	18.13	21.085	18.2842	-1.75714	205097_at	solute carrier family 26 (sulfate transporter), member 2
DYRK2	2.41e-05	0.0013459	62.0566	14.092	24.5527	-2.52749	38.3425	47.2084	35.279	-1.75903	202971_s_at	dual-specificity tyrosine-(Y)-phosphorylation regulated kinase 2
PLXNA1	2e-07	3.18e-05	22.0341	9.9075	9.2763	-2.37531	10.8979	12.3588	12.5232	-1.75947	221538_s_at	plexin A1
GSDMB	2.46e-05	0.0013711	144.474	70.8923	64.8207	-2.22883	72.9085	79.5292	82.1113	-1.75949	219233_s_at	gasdermin B
NA	8.8e-06	0.0006281	33.5886	16.1787	13.7925	-2.43528	17.3735	17.4759	19.0798	-1.76042	1558742_at	NA
SPOCK2	1e-06	0.0001186	77.0429	32.698	35.9028	-2.14588	44.329	44.1678	43.7432	-1.76126	202523_s_at	sparc/osteonectin, cwcv and kazal-like domains proteoglycan (testican) 2
ANKZF1	2.02e-05	0.0011812	152.761	117.317	96.6961	-1.57981	90.7467	96.5364	86.6707	-1.76255	218274_s_at	ankyrin repeat and zinc finger domain containing 1
NA	0.0004391	0.0125302	53.422	27.2671	27.7117	-1.92778	36.4937	36.9533	30.3027	-1.76295	232511_at	NA
NLRC3	< 1e-07	< 1e-07	174.167	17.7508	48.5264	-3.58911	66.9293	103.496	98.7143	-1.76435	236295_s_at	NLR family, CARD domain containing 3
GALT	0.0001692	0.0060982	17.9059	9.54732	9.35478	-1.9141	11.0896	10.6703	10.1456	-1.7649	242734_x_at	galactose-1-phosphate uridylyltransferase
CARD11	7e-07	8.86e-05	31.4411	12.4009	12.3619	-2.54339	15.4823	16.8368	17.8128	-1.76508	1562368_at	caspase recruitment domain family, member 11
NA	4.7e-06	0.0003905	35.158	12.9132	13.8337	-2.54148	18.6606	21.9948	19.9056	-1.76624	239794_at	NA
EVL	< 1e-07	< 1e-07	422.897	108.646	137.807	-3.06877	202.155	244.298	239.261	-1.76752	217838_s_at	Enah/Vasp-like
ZFP90	1.47e-05	0.0009217	148.975	46.1134	59.0217	-2.52407	89.6207	103.875	84.2831	-1.76756	235698_at	zinc finger protein 90 homolog (mouse)
C8orf5	0.0001501	0.005579	9.84396	5.03653	5.25899	-1.87183	5.76825	5.43014	5.56792	-1.76798	236047_at	chromosome 8 open reading frame 5
RUNX3	6.6e-06	0.0005054	906.645	287.339	310.145	-2.92329	446.696	490.638	512.586	-1.76877	204198_s_at	runt-related transcription factor 3
CXorf65	0.0004604	0.0129688	59.5063	48.3284	32.2975	-1.84245	33.0823	36.1453	33.6314	-1.76937	231377_at	chromosome X open reading frame 65
MORC2	3e-06	0.0002711	40.5232	18.0321	19.8099	-2.0456	21.8944	23.6159	22.882	-1.77096	216863_s_at	MORC family CW-type zinc finger 2
FBXO32	1.2e-06	0.0001361	24.7217	10.2512	12.4328	-1.98842	12.2623	12.9666	13.9553	-1.7715	225803_at	F-box protein 32
NA	1e-07	1.75e-05	58.238	33.7858	31.0187	-1.87751	37.1071	34.1129	32.8674	-1.77191	237337_at	NA
EEF1B2	0.0006148	0.015737	685.22	287.934	344.607	-1.98841	481.566	434.439	386.705	-1.77194	200705_s_at	eukaryotic translation elongation factor 1 beta 2
USP14	5.5e-06	0.000439	172.328	71.7453	69.9997	-2.46184	99.3089	103.27	97.1565	-1.77371	201671_x_at	ubiquitin specific peptidase 14 (tRNA-guanine transglycosylase)
PDE7A	0.000168	0.006067	85.066	50.5741	37.2843	-2.28155	51.7862	59.1226	47.9433	-1.7743	1552343_s_at	phosphodiesterase 7A
P4HTM	2.1e-06	0.0002091	84.0769	43.0871	45.192	-1.86044	48.5981	50.611	47.3803	-1.77451	222125_s_at	prolyl 4-hydroxylase, transmembrane (endoplasmic reticulum)
NA	0.0001369	0.0052088	14.598	7.12139	7.84021	-1.86194	8.20943	9.78854	8.22093	-1.77571	240188_at	NA
SBK1	< 1e-07	< 1e-07	73.5189	23.2254	31.4843	-2.3351	36.0131	42.4169	41.3906	-1.77622	226548_at	SH3-binding domain kinase 1
RSBN1	0.0008919	0.0205238	245.412	181.126	133.593	-1.83701	156.674	153.945	138.068	-1.77746	222788_s_at	round spermatid basic protein 1
WDR74	3.5e-05	0.0018156	77.0293	40.6278	40.7638	-1.88965	47.732	46.2578	43.3365	-1.77747	221712_s_at	WD repeat domain 74
NA	3.04e-05	0.0016168	138.791	60.9472	59.4133	-2.33603	81.0053	78.0411	78.0124	-1.77909	239808_at	NA
SNRPA	3.9e-06	0.0003347	248.36	129.249	112.866	-2.20048	130.779	145.14	139.587	-1.77925	201770_at	small nuclear ribonucleoprotein polypeptide A
CDK10	9.3e-06	0.0006561	56.1317	32.8021	23.6219	-2.37626	28.954	31.4649	31.5427	-1.77954	203468_at	cyclin-dependent kinase 10
PAAF1	7.37e-05	0.0032288	40.6927	23.3529	20.3641	-1.99826	24.5054	27.4917	22.8589	-1.78017	1568702_a_at	proteasomal ATPase-associated factor 1
FXC1	5e-07	6.78e-05	123.354	55.0786	44.1999	-2.79081	64.0029	71.3298	69.2806	-1.7805	222481_at	fracture callus 1 homolog (rat)
MORC2	< 1e-07	< 1e-07	143.661	68.4746	61.1836	-2.34803	77.1335	78.8086	80.6309	-1.78171	203956_at	MORC family CW-type zinc finger 2
CD8A	< 1e-07	< 1e-07	349.082	26.6106	82.0509	-4.25446	148.96	236.684	195.924	-1.78172	205758_at	CD8a molecule
ANXA6	0.0008749	0.0202263	420.838	196.623	171.043	-2.46042	222.55	260.631	235.972	-1.78343	200982_s_at	annexin A6
C6orf129	3.6e-05	0.0018551	69.1063	33.701	33.2715	-2.07704	45.5513	38.2395	38.7446	-1.78364	225723_at	chromosome 6 open reading frame 129
LOC440993	4.21e-05	0.002085	209.572	87.6165	72.5478	-2.88874	107.572	97.3917	117.49	-1.78374	1557293_at	hypothetical gene supported by AK128346
DNAJC30	1.3e-05	0.0008412	109.25	50.5198	48.546	-2.25045	66.2796	62.8018	61.2398	-1.78397	239018_at	DnaJ (Hsp40) homolog, subfamily C, member 30
BZRAP1	4.4e-06	0.0003712	66.7835	32.4643	30.1153	-2.21759	33.7797	39.9303	37.4103	-1.78516	205839_s_at	benzodiazapine receptor (peripheral) associated protein 1
MLLT6	< 1e-07	< 1e-07	361.926	192.726	138.994	-2.60389	171.803	212.494	202.74	-1.78517	224784_at	myeloid/lymphoid or mixed-lineage leukemia (trithorax homolog, Drosophila); translocated to, 6
NKG7	0.0001744	0.0062527	1255.07	292.771	419.616	-2.99099	605.204	680.719	702.938	-1.78546	213915_at	natural killer cell group 7 sequence
RPL3	0.0007286	0.0177602	1381.46	398.791	671.445	-2.05745	835.539	720.091	773.173	-1.78675	211666_x_at	ribosomal protein L3
CEP164	0.0006259	0.0159316	423.003	273.992	192.986	-2.19189	222.289	221.294	236.544	-1.78826	1558953_s_at	centrosomal protein 164kDa
EXOSC10	1e-07	1.75e-05	153.411	65.245	64.3644	-2.38347	76.6833	75.5753	85.742	-1.78921	207541_s_at	exosome component 10
LIAS	0.0009244	0.0210941	33.0884	14.9061	20.248	-1.63415	21.3155	21.3518	18.4914	-1.78939	214045_at	lipoic acid synthetase
NA	1e-07	1.75e-05	34.8092	14.9842	13.9657	-2.49247	19.0439	18.7	19.4463	-1.79002	244605_at	NA
MIF	1.5e-06	0.0001618	976.417	414.083	376.822	-2.59119	583.355	604.3	545.281	-1.79067	217871_s_at	macrophage migration inhibitory factor (glycosylation-inhibiting factor)
CXorf42	0.0008544	0.0199123	43.4708	29.1084	23.4376	-1.85474	25.2992	26.7749	24.2744	-1.79081	236493_at	chromosome X open reading frame 42
AKR1B1	0.0001718	0.0061757	390.092	158.725	166.288	-2.34588	215.517	239.884	217.781	-1.79121	201272_at	aldo-keto reductase family 1, member B1 (aldose reductase)
NA	2.18e-05	0.0012442	18.963	10.0986	9.77066	-1.94081	10.7474	9.97024	10.584	-1.79166	1570439_at	NA
VILL	1.1e-06	0.0001266	66.0528	49.2812	28.9121	-2.28461	36.9694	34.3442	36.8564	-1.79217	209950_s_at	villin-like
FLYWCH1	0.0001748	0.0062629	124.465	69.4307	65.7726	-1.89236	73.6942	79.6892	69.4178	-1.79299	223950_s_at	FLYWCH-type zinc finger 1
NA	< 1e-07	< 1e-07	17.0275	7.57029	7.66792	-2.22062	9.20256	10.8847	9.49437	-1.79343	215386_at	NA
TMIGD2	2.1e-06	0.0002091	160.165	74.7365	77.621	-2.06343	99.0131	89.8029	89.2984	-1.7936	244716_x_at	transmembrane and immunoglobulin domain containing 2
NA	2.4e-06	0.0002294	29.4099	10.397	10.8728	-2.7049	18.1429	20.622	16.3967	-1.79365	239545_at	NA
NA	2.38e-05	0.001336	50.9529	24.4189	20.4594	-2.49044	31.1404	32.8978	28.3921	-1.79461	1570335_at	NA
HIP1R	0.0001347	0.0051466	125.257	71.1573	59.4138	-2.10821	73.604	79.6626	69.786	-1.79487	38340_at	huntingtin interacting protein 1 related
AARS2	2.2e-06	0.0002156	75.2954	37.8324	39.0937	-1.92602	41.0012	42.8617	41.9176	-1.79627	231845_at	alanyl-tRNA synthetase 2, mitochondrial (putative)
WBSCR22	0.0003472	0.0104306	202.435	89.5424	92.529	-2.1878	104.957	99.7074	112.667	-1.79676	207628_s_at	Williams Beuren syndrome chromosome region 22
NCALD	1e-07	1.75e-05	47.2287	9.70087	17.1234	-2.75814	20.427	27.6736	26.2711	-1.79775	211685_s_at	neurocalcin delta
LY9	3.09e-05	0.0016355	41.1263	16.45	21.0869	-1.95033	30.8493	26.0826	22.8296	-1.80145	210370_s_at	lymphocyte antigen 9
NA	3.8e-05	0.0019309	29.1661	10.2198	11.1895	-2.60657	17.765	23.3151	16.1896	-1.80153	233713_at	NA
NA	0.0007862	0.0187138	42.3714	20.4825	18.409	-2.30166	24.7079	28.3019	23.5151	-1.80188	215376_at	NA
ITGB7	3e-06	0.0002711	239.662	89.3398	101.853	-2.35301	127.96	137.984	133.004	-1.80191	205718_at	integrin, beta 7
MAN1C1	5e-07	6.78e-05	29.2597	14.4702	15.0005	-1.95058	15.3496	17.3126	16.2311	-1.80269	214180_at	mannosidase, alpha, class 1C, member 1
NAPEPLD	2.1e-05	0.0012112	19.7975	8.92513	8.37727	-2.36324	10.1133	11.6705	10.9699	-1.8047	233539_at	N-acyl phosphatidylethanolamine phospholipase D
DDX24	0.0004992	0.0137362	447.385	203.627	206.369	-2.16789	233.124	236.764	247.834	-1.80518	200702_s_at	DEAD (Asp-Glu-Ala-Asp) box polypeptide 24
NA	0.0006548	0.0164075	23.0868	12.3769	11.7247	-1.96908	13.5882	14.7175	12.7882	-1.80532	1564665_at	NA
NA	5.7e-06	0.0004517	27.7007	9.24489	11.44	-2.4214	14.912	17.1149	15.3422	-1.80552	238694_at	NA
DPP4	< 1e-07	< 1e-07	17.4336	5.58594	7.80999	-2.23221	9.77892	11.7965	9.64937	-1.8067	203717_at	dipeptidyl-peptidase 4
DOCK10	1.17e-05	0.0007754	57.0496	21.7949	20.3972	-2.79693	32.1678	33.6747	31.5751	-1.80679	215151_at	dedicator of cytokinesis 10
SNORA28	0.0002902	0.0091293	54.298	55.9905	40.1659	-1.35184	41.7983	27.4503	30.0511	-1.80686	241843_at	small nucleolar RNA, H/ACA box 28
KLHDC4	< 1e-07	< 1e-07	83.0096	25.963	33.1573	-2.50351	41.2219	52.4258	45.9271	-1.80742	229035_s_at	kelch domain containing 4
NA	3.5e-05	0.0018156	8.94209	4.84325	4.16476	-2.14708	4.35789	4.08579	4.94673	-1.80768	243262_at	NA
NA	2.8e-06	0.0002582	159.783	73.0074	66.7484	-2.39382	76.6654	80.4783	88.3729	-1.80806	243869_at	NA
NA	0.0003647	0.0108724	35.7648	22.863	20.7865	-1.72058	20.9238	22.9001	19.7696	-1.80908	215401_at	NA
LMF1	5.8e-06	0.0004583	26.6157	13.0857	12.3755	-2.15068	14.6169	14.3781	14.7085	-1.80955	219136_s_at	lipase maturation factor 1
TNFRSF10A	1e-07	1.75e-05	260.733	131.655	84.7392	-3.07689	124.564	125.945	144.016	-1.81045	231775_at	tumor necrosis factor receptor superfamily, member 10a
PDCD6	0.0001901	0.0066456	224.727	198.962	109.702	-2.04852	135.007	134.207	124.071	-1.81128	222380_s_at	programmed cell death 6
NA	0.0007961	0.0188754	11.2938	6.39313	7.33071	-1.54062	7.41238	6.88581	6.23076	-1.81259	236353_at	NA
NA	0.0002842	0.0089767	46.0633	20.537	19.2868	-2.38834	26.5965	29.6438	25.4094	-1.81285	1560082_at	NA
RASGRF2	6e-07	7.94e-05	33.1014	12.317	12.1835	-2.7169	17.5381	19.8002	18.2566	-1.81312	228109_at	Ras protein-specific guanine nucleotide-releasing factor 2
ANKS6	3e-07	4.57e-05	34.2431	16.1948	16.6501	-2.05664	18.6596	18.8399	18.8843	-1.81332	226586_at	ankyrin repeat and sterile alpha motif domain containing 6
NA	3.69e-05	0.0018908	43.1279	17.2577	16.2228	-2.65847	27.9924	22.9215	23.7569	-1.81539	235652_at	NA
NGDN	0.0001417	0.0053284	21.4541	10.7435	10.1034	-2.12345	11.7183	10.5763	11.8024	-1.81777	216263_s_at	neuroguidin, EIF4E binding protein
GLTSCR2	2.1e-06	0.0002091	511.87	224.418	225.033	-2.27464	297.036	275.447	281.45	-1.81869	234339_s_at	glioma tumor suppressor candidate region gene 2
ITFG2	2.5e-06	0.0002369	107.98	68.0958	63.6352	-1.69687	68.391	69.9697	59.3578	-1.81914	220590_at	integrin alpha FG-GAP repeat containing 2
THEM4	1e-07	1.75e-05	26.1805	9.55972	10.9924	-2.38169	13.9137	14.4323	14.3834	-1.8202	229253_at	thioesterase superfamily member 4
FLT3LG	2.2e-05	0.001253	51.9605	19.0687	23.9576	-2.16885	25.6483	22.309	28.5413	-1.82054	206980_s_at	fms-related tyrosine kinase 3 ligand
MLL	0.0002261	0.0075241	105.423	39.2572	47.0332	-2.24147	55.3332	50.8247	57.8275	-1.82307	212078_s_at	myeloid/lymphoid or mixed-lineage leukemia (trithorax homolog, Drosophila)
NA	1e-07	1.75e-05	8.02578	4.07474	4.16056	-1.92902	5.05791	4.3919	4.40212	-1.82316	232439_at	NA
ZNF500	0.0004821	0.0134185	64.4441	38.7071	30.7189	-2.09786	35.9582	36.3162	35.3212	-1.82452	41113_at	zinc finger protein 500
38420	5.64e-05	0.0026111	73.5318	31.8523	36.7234	-2.00232	43.3929	43.6278	40.2999	-1.82462	226454_at	membrane-associated ring finger (C3HC4) 9
DGKZ	0.0003025	0.009408	713.274	594.644	454.56	-1.56915	428.666	381.617	390.819	-1.82507	207556_s_at	diacylglycerol kinase, zeta 104kDa
NSUN5C	5e-07	6.78e-05	199.385	105.733	90.6414	-2.19971	103.611	109.314	109.236	-1.82526	213460_x_at	NOL1/NOP2/Sun domain family, member 5C
MATK	8e-07	9.9e-05	198.513	56.0988	71.8294	-2.76368	107.723	122.593	108.755	-1.82532	206267_s_at	megakaryocyte-associated tyrosine kinase
RPL10	2.73e-05	0.0014793	263.041	117.522	130.35	-2.01796	166.77	147.408	143.955	-1.82724	221989_at	ribosomal protein L10
TARP	2e-07	3.18e-05	299.555	31.7076	76.1743	-3.93249	120.074	199.069	163.881	-1.82788	216920_s_at	TCR gamma alternate reading frame protein
THEM4	< 1e-07	< 1e-07	44.0706	12.609	18.6063	-2.36859	22.3683	16.8797	24.0983	-1.82878	1553118_at	thioesterase superfamily member 4
LOC100132815	< 1e-07	< 1e-07	23.5987	9.64408	11.4472	-2.06153	14.4327	14.0381	12.9013	-1.82917	227234_at	hypothetical protein LOC100132815
NOP56	< 1e-07	< 1e-07	341.285	136.243	134.044	-2.54607	168.591	181.606	186.391	-1.83102	200875_s_at	NOP56 ribonucleoprotein homolog (yeast)
RPS2P45	8.4e-06	0.0006107	18.416	8.62343	7.17526	-2.56659	10.3135	11.4079	10.0459	-1.83318	207489_at	ribosomal protein S2 pseudogene 45
GPSN2	0.00013	0.0050161	19.6047	8.97114	7.59974	-2.57965	9.41566	9.7395	10.6796	-1.83572	1569392_at	glycoprotein, synaptic 2
NA	5.3e-06	0.0004312	71.7905	34.0812	33.1673	-2.1645	43.5374	38.7665	39.0864	-1.83671	214857_at	NA
AKT3	3.3e-06	0.0002943	18.2672	8.04726	6.93382	-2.63451	10.3592	10.9945	9.94508	-1.83681	242876_at	v-akt murine thymoma viral oncogene homolog 3 (protein kinase B, gamma)
LOC285014	4.71e-05	0.0022589	70.8919	36.5001	34.3859	-2.06166	40.6486	45.3609	38.5946	-1.83683	235621_at	hypothetical protein LOC285014
TSHZ2	5e-07	6.78e-05	17.463	9.23117	9.12468	-1.91382	9.62815	9.55097	9.49277	-1.83961	235616_at	teashirt zinc finger homeobox 2
NA	< 1e-07	< 1e-07	72.2006	32.6301	29.0358	-2.4866	38.8934	45.091	39.237	-1.84012	239841_at	NA
NDUFB8	7.1e-06	0.0005362	110.712	50.4172	49.9595	-2.21604	61.9056	65.9654	60.1515	-1.84056	214241_at	NADH dehydrogenase (ubiquinone) 1 beta subcomplex, 8, 19kDa
C19orf2	1.29e-05	0.0008377	128.226	36.0698	41.6992	-3.07502	65.965	68.6268	69.6366	-1.84136	222266_at	chromosome 19 open reading frame 2
NA	< 1e-07	< 1e-07	80.5757	13.0046	15.4869	-5.20284	27.8659	45.0032	43.7351	-1.84236	1566608_at	NA
SIT1	1e-07	1.75e-05	133.865	45.8239	61.6124	-2.17269	71.2509	77.6381	72.5687	-1.84466	205484_at	signaling threshold regulating transmembrane adaptor 1
NA	0.0001647	0.0059715	56.3077	30.321	22.7322	-2.477	32.2684	34.5809	30.5233	-1.84475	1560982_at	NA
NA	0.0002136	0.0072392	88.2335	50.097	43.554	-2.02584	51.9555	45.7738	47.7564	-1.84758	241867_at	NA
NA	< 1e-07	< 1e-07	47.7232	16.8547	17.1061	-2.78983	23.9691	26.4192	25.8168	-1.84853	242879_x_at	NA
NA	0.0001357	0.0051739	52.6964	22.791	20.4963	-2.57103	33.36	35.0569	28.4993	-1.84904	232338_at	NA
NA	3.6e-06	0.0003149	146.017	50.5533	58.4302	-2.499	75.0813	90.3531	78.9237	-1.8501	1564154_at	NA
NA	1.28e-05	0.0008341	79.0553	32.5289	34.2772	-2.30635	53.5584	51.9892	42.6921	-1.85175	243910_x_at	NA
POLD2	0.000458	0.0129145	98.9768	58.7484	55.0369	-1.79837	65.7435	71.2262	53.3958	-1.85364	201115_at	polymerase (DNA directed), delta 2, regulatory subunit 50kDa
NPAL3	2.9e-06	0.0002651	112.954	54.0249	62.1723	-1.81679	63.9494	57.886	60.8814	-1.85531	214579_at	NIPA-like domain containing 3
C7orf54	0.0001571	0.0057725	106.823	51.726	42.1797	-2.53256	60.4319	55.2235	57.5521	-1.8561	210109_at	chromosome 7 open reading frame 54
SLC38A1	0.0005524	0.0146756	58.5085	32.0522	27.8055	-2.10421	40.0385	29.8126	31.5218	-1.85613	224580_at	solute carrier family 38, member 1
NIT2	0.0004003	0.011679	69.3833	33.6272	36.7951	-1.88567	40.5518	44.434	37.3592	-1.85719	218557_at	nitrilase family, member 2
NA	0.0004049	0.011763	39.5098	18.6806	14.3845	-2.74669	28.1925	25.4938	21.2698	-1.85755	239091_at	NA
SYS1	3.1e-05	0.0016376	36.9676	19.1646	18.2021	-2.03095	23.1498	25.6357	19.889	-1.8587	238470_at	SYS1 Golgi-localized integral membrane protein homolog (S. cerevisiae)
SEMA6A	8.63e-05	0.0036464	21.3699	10.9457	11.1243	-1.92102	11.1552	14.4963	11.4971	-1.85871	1558338_at	sema domain, transmembrane domain (TM), and cytoplasmic domain, (semaphorin) 6A
NA	1.6e-06	0.0001712	70.5024	33.8635	25.3767	-2.77823	39.9576	40.6746	37.9112	-1.85967	244332_at	NA
NA	1e-07	1.75e-05	16.4133	8.6165	9.7513	-1.68319	8.71442	10.5616	8.81547	-1.86187	1558847_at	NA
NA	6.34e-05	0.0028695	48.4519	24.9957	23.4693	-2.06448	28.0167	23.8155	26.023	-1.86189	233243_at	NA
NSUN5B	4e-07	5.79e-05	128.162	66.7918	54.984	-2.3309	62.5609	66.4233	68.7926	-1.86303	213670_x_at	NOL1/NOP2/Sun domain family, member 5B
HIVEP3	1e-07	1.75e-05	14.6453	5.91053	5.77673	-2.53523	7.16146	6.46377	7.85355	-1.86481	233884_at	human immunodeficiency virus type I enhancer binding protein 3
NA	0.0002934	0.0091929	52.1497	28.9479	24.8913	-2.09509	28.8202	27.7846	27.9404	-1.86646	232906_at	NA
KIAA1652	0.0005017	0.0137841	202.55	134.802	97.8581	-2.06983	125.783	117.669	108.472	-1.86729	230880_at	KIAA1652 protein
GZMB	9.05e-05	0.0037628	807.589	165.037	280.731	-2.87674	404.383	459.256	432.485	-1.86732	210164_at	granzyme B (granzyme 2, cytotoxic T-lymphocyte-associated serine esterase 1)
NA	0.000787	0.0187246	69.5107	33.263	25.2835	-2.74925	37.5631	38.5698	37.2186	-1.86763	228049_x_at	NA
MIAT	1e-07	1.75e-05	191.01	58.8232	59.2595	-3.22328	69.9826	80.7937	102.261	-1.86787	227168_at	myocardial infarction associated transcript (non-protein coding)
BNC2	0.0002796	0.0088653	17.0755	8.57198	9.85153	-1.73329	9.53005	10.0896	9.13424	-1.8694	230722_at	basonuclin 2
NA	0.0006585	0.01647	33.5818	13.1085	11.6841	-2.87416	15.7247	17.0521	17.9636	-1.86944	232372_at	NA
PPP1R3E	0.0002008	0.0069266	183.921	99.931	96.8692	-1.89865	117.848	114.648	98.315	-1.87073	229001_at	protein phosphatase 1, regulatory (inhibitor) subunit 3E
NA	0.0001258	0.0048712	443.89	257.163	186.994	-2.37381	229.674	185.595	237.15	-1.87177	1557632_at	NA
SARM1	< 1e-07	< 1e-07	41.1075	17.7144	18.2947	-2.24696	21.9139	23.4587	21.9594	-1.87197	213257_at	sterile alpha and TIR motif containing 1
RNASEH1	9.9e-06	0.0006895	140.111	79.6742	59.1412	-2.3691	78.3781	85.2591	74.8021	-1.87309	218496_at	ribonuclease H1
C21orf96	0.0001078	0.0043211	308.025	176.172	141.22	-2.18117	163.614	155.839	164.355	-1.87414	220918_at	chromosome 21 open reading frame 96
MRPS9	8.8e-06	0.0006281	47.3271	19.1475	18.7972	-2.51777	23.647	23.642	25.2258	-1.87614	226749_at	mitochondrial ribosomal protein S9
FCGBP	1.08e-05	0.0007326	45.5317	24.7777	21.0227	-2.16583	26.1872	26.693	24.2596	-1.87685	203240_at	Fc fragment of IgG binding protein
FAM62A	2.67e-05	0.0014584	549.978	230.805	246.131	-2.23449	304.149	344.958	292.741	-1.87872	208858_s_at	family with sequence similarity 62 (C2 domain containing), member A
NSUN5B	3e-07	4.57e-05	243.354	124.849	112.205	-2.16884	133.073	136.08	129.519	-1.8789	214100_x_at	NOL1/NOP2/Sun domain family, member 5B
HECTD1	9.89e-05	0.0040444	59.0687	30.9948	26.8092	-2.2033	43.914	37.0689	31.4362	-1.87901	242349_at	HECT domain containing 1
NA	0.0001458	0.0054638	9.57528	4.96434	4.57772	-2.09171	6.1687	5.40601	5.09363	-1.87985	234758_at	NA
PLCG1	< 1e-07	< 1e-07	168.8	52.5303	57.1092	-2.95575	75.1249	86.2196	89.7166	-1.88149	202789_at	phospholipase C, gamma 1
CRIP2	0.0005136	0.0140055	36.2331	20.1721	20.4512	-1.77169	23.6696	19.1531	19.2464	-1.88259	208978_at	cysteine-rich protein 2
NA	4.66e-05	0.0022409	10.3455	4.86472	4.38321	-2.36026	6.39585	5.26846	5.49211	-1.8837	1558409_at	NA
LOC284440	4e-07	5.79e-05	10.3501	4.86881	5.052	-2.04871	5.77951	5.90069	5.48739	-1.88615	1555363_s_at	hypothetical LOC284440
PEBP1	3.64e-05	0.0018705	138.868	41.2441	58.4641	-2.37526	72.4856	84.5022	73.5915	-1.88701	205353_s_at	phosphatidylethanolamine binding protein 1
NA	0.0001891	0.0066191	17.1344	7.99064	6.8873	-2.48782	9.09785	10.0356	9.078	-1.88746	231087_at	NA
YPEL2	0.0004831	0.0134243	54.5369	37.9619	26.683	-2.04388	29.8646	26.1786	28.8694	-1.88909	1556420_s_at	yippee-like 2 (Drosophila)
HSD17B8	9e-07	0.0001096	159.581	61.4113	71.1048	-2.2443	95.2255	79.987	84.4359	-1.88997	213540_at	hydroxysteroid (17-beta) dehydrogenase 8
FBXL16	0.0002137	0.0072392	66.1665	25.5327	29.7221	-2.22617	30.0957	36.9273	35.0077	-1.89005	227641_at	F-box and leucine-rich repeat protein 16
LOC100131067	0.0001336	0.0051117	28.7004	13.7619	10.8521	-2.64469	16.1443	13.6457	15.1837	-1.89021	242585_at	hypothetical protein LOC100131067
NA	2.24e-05	0.0012705	44.2461	19.8938	18.1942	-2.43188	23.8366	24.3875	23.4018	-1.89071	1566232_at	NA
KIAA0748	7.1e-06	0.0005362	62.1947	29.051	27.8808	-2.23074	31.3029	33.168	32.8766	-1.89176	219724_s_at	KIAA0748
NA	< 1e-07	< 1e-07	41.0636	17.1796	17.8501	-2.30047	23.9008	26.0004	21.689	-1.89329	230640_at	NA
NA	4.97e-05	0.0023506	17.3063	6.30235	7.02456	-2.46368	7.7929	8.57543	9.13772	-1.89394	243915_at	NA
TMEM161B	0.0001387	0.0052483	106.797	51.0853	43.1853	-2.47299	61.4515	60.6322	56.3404	-1.89556	238783_at	transmembrane protein 161B
LDHB	< 1e-07	< 1e-07	1195.6	339.003	454.446	-2.6309	596.594	603.913	630.327	-1.8968	213564_x_at	lactate dehydrogenase B
MSI2	0.0005638	0.0148845	83.0917	44.0009	35.6473	-2.33094	40.3263	40.8025	43.7851	-1.89772	239232_at	musashi homolog 2 (Drosophila)
NA	0.0008294	0.0194374	27.5325	16.8146	14.087	-1.95445	16.9034	16.6619	14.5077	-1.89778	239851_at	NA
NA	3.38e-05	0.0017634	36.1134	15.3158	15.1372	-2.38573	19.4507	20.7633	19.0229	-1.89841	236512_at	NA
HOOK1	1.59e-05	0.0009779	14.6711	6.83712	6.14827	-2.38622	8.85095	8.15671	7.72684	-1.89872	219976_at	hook homolog 1 (Drosophila)
BCL2	1e-07	1.75e-05	58.6242	9.05522	18.1121	-3.23674	26.5368	34.592	30.8722	-1.89894	203685_at	B-cell CLL/lymphoma 2
LOC100129673	1.07e-05	0.0007285	27.8897	10.2991	11.0285	-2.52888	15.6022	16.9852	14.6529	-1.90336	236075_s_at	similar to hCG2042915
FAM86B1	0.000934	0.0212688	18.3533	9.15646	9.6619	-1.89955	11.5768	11.1249	9.63037	-1.90577	65585_at	family with sequence similarity 86, member B1
SNRPD2	0.000298	0.0092997	1100.02	424.417	455.82	-2.41327	646.683	593.666	576.933	-1.90666	200826_at	small nuclear ribonucleoprotein D2 polypeptide 16.5kDa
NA	5.7e-06	0.0004517	12.2428	5.83467	5.46853	-2.23878	5.63378	6.17756	6.42045	-1.90685	216189_at	NA
NA	0.0005974	0.0155242	22.5611	10.2151	9.33414	-2.41705	10.7986	12.449	11.8285	-1.90734	244298_at	NA
LSM7	0.0005728	0.0150422	463.692	240.685	205.897	-2.25205	281.674	246.302	243.075	-1.90761	204559_s_at	LSM7 homolog, U6 small nuclear RNA associated (S. cerevisiae)
ASNS	1.42e-05	0.0008976	81.7472	28.4738	32.1437	-2.54318	33.489	30.7911	42.8204	-1.90907	205047_s_at	asparagine synthetase
IPO9	0.0001527	0.0056334	269.147	111.698	100.329	-2.68264	139.717	150.802	140.886	-1.91038	217885_at	importin 9
LOC100133233	1.03e-05	0.0007093	108.066	29.27	36.2162	-2.9839	47.7457	50.6472	56.5398	-1.91132	240265_at	hypothetical protein LOC100133233
NA	1.24e-05	0.0008129	67.4398	25.1498	20.393	-3.30701	35.4061	31.8073	35.2637	-1.91244	227082_at	NA
NA	5.82e-05	0.0026808	19.2472	8.31709	8.2336	-2.33763	9.14615	10.7284	10.0606	-1.91313	1559063_at	NA
TMC8	5.6e-05	0.0025947	687.476	313.435	340.372	-2.01978	356.257	350.589	359.316	-1.91329	227353_at	transmembrane channel-like 8
NA	1e-07	1.75e-05	32.7995	13.9018	14.3785	-2.28115	17.731	17.6077	17.1406	-1.91355	233995_at	NA
NA	0.0005183	0.0140775	372.894	194.918	147.014	-2.53646	202.878	195.837	194.851	-1.91373	233690_at	NA
LPIN1	< 1e-07	< 1e-07	429.045	128.828	129.637	-3.3096	202.843	228.262	224.111	-1.91443	212274_at	lipin 1
SIDT1	< 1e-07	< 1e-07	101.106	25.4891	30.3678	-3.3294	45.4754	60.7062	52.7673	-1.91608	219734_at	SID1 transmembrane family, member 1
LDHB	1e-07	1.75e-05	1103.47	326.996	426.37	-2.58805	539.268	562.009	575.836	-1.91629	201030_x_at	lactate dehydrogenase B
ABI2	6.01e-05	0.0027475	130.213	45.3443	48.7757	-2.66963	79.3412	74.0136	67.8717	-1.91852	225098_at	abl interactor 2
GPATCH4	1.31e-05	0.0008446	62.4823	25.7592	28.1431	-2.22017	30.0552	30.08	32.566	-1.91864	224632_at	G patch domain containing 4
NA	1e-06	0.0001186	199.204	76.1506	70.0848	-2.84233	100.861	115.257	103.817	-1.9188	236699_at	NA
CD160	0.0001005	0.0040823	43.7579	9.01194	15.9351	-2.74601	24.012	32.8177	22.7675	-1.92194	207840_at	CD160 molecule
TTC27	8.8e-06	0.0006281	34.66	17.4828	15.04	-2.30452	18.5737	18.6845	18.033	-1.92204	244248_at	tetratricopeptide repeat domain 27
NA	3.1e-06	0.0002779	20.4732	8.96863	8.99541	-2.27596	10.6583	10.3949	10.6426	-1.9237	242839_at	NA
TMEM223	6.5e-06	0.0004984	372.673	147.393	139.329	-2.67477	217.869	212.235	193.672	-1.92425	220934_s_at	transmembrane protein 223
ZNF500	9.91e-05	0.0040495	126.66	65.8163	48.9437	-2.58787	66.0366	67.5176	65.8007	-1.9249	213639_s_at	zinc finger protein 500
LOC572558	4.37e-05	0.0021371	89.8802	37.2995	29.2996	-3.06762	48.6853	53.5572	46.6827	-1.92534	231024_at	hypothetical locus LOC572558
GART	0.0004965	0.0136991	99.668	40.8006	31.8815	-3.1262	58.1184	55.1211	51.6785	-1.92862	230097_at	phosphoribosylglycinamide formyltransferase, phosphoribosylglycinamide synthetase, phosphoribosylaminoimidazole synthetase
NA	5.7e-06	0.0004517	79.1565	31.4343	34.3193	-2.30647	42.8761	46.9859	41.0388	-1.92882	1563473_at	NA
NA	< 1e-07	< 1e-07	56.0506	20.9767	23.3	-2.40561	30.8424	32.8765	29.0509	-1.92939	233214_at	NA
AMIGO1	< 1e-07	< 1e-07	35.4327	12.7873	15.3535	-2.30779	17.8351	18.7063	18.3537	-1.93054	226718_at	adhesion molecule with Ig-like domain 1
PTCD3	2e-06	0.0002025	123.472	46.8653	45.1108	-2.73709	63.7946	78.366	63.8896	-1.93259	228512_at	Pentatricopeptide repeat domain 3
TCF12	0.000117	0.0046221	21.587	10.4038	9.66738	-2.23297	11.6127	13.2756	11.1634	-1.93373	215611_at	transcription factor 12
GIMAP5	< 1e-07	< 1e-07	824.394	187.01	238.192	-3.46104	359.523	396.432	425.997	-1.93521	64064_at	GTPase, IMAP family member 5
SAMM50	3.59e-05	0.0018535	207.719	118.831	92.5359	-2.24474	104.523	112.194	107.322	-1.93548	201569_s_at	sorting and assembly machinery component 50 homolog (S. cerevisiae)
NA	5.75e-05	0.002653	160.44	97.2384	62.4063	-2.57089	87.9037	84.8787	82.865	-1.93616	236494_x_at	NA
NA	< 1e-07	< 1e-07	134.668	22.3886	40.4408	-3.33	61.5648	65.6988	69.441	-1.93932	228442_at	NA
NUCKS1	3.78e-05	0.0019243	478.505	176.239	164.681	-2.90565	277.533	251.645	246.687	-1.93973	217802_s_at	nuclear casein kinase and cyclin-dependent kinase substrate 1
CIRH1A	7e-07	8.86e-05	130.878	48.8203	48.3566	-2.70652	62.7196	73.9426	67.4156	-1.94136	224903_at	cirrhosis, autosomal recessive 1A (cirhin)
NA	2.33e-05	0.0013147	109.385	49.7496	37.842	-2.89058	54.5242	55.9319	56.3236	-1.94208	244145_at	NA
FAM19A1	1e-07	1.75e-05	9.66395	4.17144	4.34046	-2.22648	4.97877	5.71191	4.97265	-1.94342	230923_at	family with sequence similarity 19 (chemokine (C-C motif)-like), member A1
SLC25A23	2e-07	3.18e-05	48.2204	22.3603	20.3624	-2.36811	27.0492	26.0372	24.7895	-1.94519	226010_at	solute carrier family 25 (mitochondrial carrier; phosphate carrier), member 23
ZNF331	1e-07	1.75e-05	52.4662	18.5885	21.9173	-2.39382	28.7158	30.4358	26.9461	-1.94708	219228_at	zinc finger protein 331
ATP10A	< 1e-07	< 1e-07	134.791	33.7836	39.5191	-3.41079	63.9963	71.6061	69.0711	-1.95148	214255_at	ATPase, class V, type 10A
NA	1.46e-05	0.0009186	57.3346	25.1844	24.174	-2.37174	31.5497	29.5016	29.3724	-1.95199	235920_at	NA
C17orf101	0.000272	0.0086765	101.537	68.2991	41.5784	-2.44207	49.3332	59.2018	52.0097	-1.95228	53071_s_at	chromosome 17 open reading frame 101
ZNF530	2.8e-06	0.0002582	31.3488	16.4293	15.7451	-1.99102	21.0275	19.2801	16.0487	-1.95335	232228_at	zinc finger protein 530
LOC100128791	2.18e-05	0.0012442	47.5599	16.5305	18.8886	-2.51792	22.7986	29.3552	24.3257	-1.95513	231323_at	hypothetical protein LOC100128791
NA	0.000161	0.0058763	87.0904	51.6677	35.4592	-2.45607	50.6979	48.9963	44.5335	-1.95561	230713_at	NA
RDH13	0.0001525	0.0056299	133.136	62.5775	56.8323	-2.3426	64.7964	68.8645	68.0568	-1.95624	225467_s_at	retinol dehydrogenase 13 (all-trans/9-cis)
LTBP4	1.76e-05	0.0010633	55.4251	27.0195	23.3411	-2.37457	32.9324	28.2305	28.3286	-1.95651	204442_x_at	latent transforming growth factor beta binding protein 4
C5orf26	0.0001121	0.004464	193.678	82.6011	91.0858	-2.12632	108.565	107.801	98.9642	-1.95705	225698_at	chromosome 5 open reading frame 26
ZNF83	1.46e-05	0.0009186	21.4469	7.65145	8.4359	-2.54233	9.84945	9.33208	10.9567	-1.95742	236429_at	zinc finger protein 83
PTCD2	< 1e-07	< 1e-07	22.5734	10.4532	8.966	-2.51767	12.0964	11.6117	11.531	-1.95763	219658_at	pentatricopeptide repeat domain 2
NA	1.13e-05	0.0007581	183.472	120.022	91.1327	-2.01324	105.648	97.101	93.6954	-1.95818	243640_x_at	NA
ZNF551	1.77e-05	0.0010658	15.4768	7.56801	6.74953	-2.29302	9.57786	8.47581	7.90074	-1.9589	211721_s_at	zinc finger protein 551
ABHD14B	0.0004145	0.0119972	213.174	87.4979	104.597	-2.03805	122.102	133.219	108.82	-1.95896	224821_at	abhydrolase domain containing 14B
RPL36	8e-06	0.0005879	2012.79	948.739	794.789	-2.53248	1134.51	1160.45	1027.42	-1.95907	219762_s_at	ribosomal protein L36
NA	8.8e-06	0.0006281	853.471	381.267	304.007	-2.8074	403.026	425.314	435.509	-1.95971	229949_at	NA
LMF1	< 1e-07	< 1e-07	20.8055	12.0054	9.61463	-2.16394	12.7619	13.3471	10.614	-1.9602	46142_at	lipase maturation factor 1
CBR3	1.47e-05	0.0009217	39.4924	21.7202	22.2292	-1.7766	22.9979	23.4681	20.1442	-1.96048	205379_at	carbonyl reductase 3
NA	0.0003439	0.0103596	43.4974	25.2431	17.924	-2.42677	21.0748	22.0626	22.1852	-1.96065	233224_at	NA
NA	< 1e-07	< 1e-07	64.2039	13.4853	17.0203	-3.77219	27.229	32.82	32.7463	-1.96065	243154_at	NA
SCARNA17	9e-07	0.0001096	47.5981	25.9482	22.3255	-2.132	27.9505	27.8548	24.2729	-1.96095	240830_at	small Cajal body-specific RNA 17
CACNA2D2	2e-07	3.18e-05	79.1473	41.0607	33.5559	-2.35867	41.6581	49.0372	40.312	-1.96337	204811_s_at	calcium channel, voltage-dependent, alpha 2/delta subunit 2
38604	0.0002909	0.009146	83.635	27.1594	26.3245	-3.17708	35.8297	35.2498	42.586	-1.96391	1559025_at	septin 9
WDR54	2e-07	3.18e-05	169.522	55.9891	56.8525	-2.98179	75.8657	91.0398	86.3091	-1.96413	225898_at	WD repeat domain 54
USP11	4.36e-05	0.002136	353.059	137.37	164.113	-2.15132	170.869	183.567	179.733	-1.96435	208723_at	ubiquitin specific peptidase 11
NA	0.0002331	0.0077101	60.8306	29.9543	25.1463	-2.41906	33.0929	31.9024	30.9461	-1.9657	1558719_s_at	NA
NA	3.79e-05	0.0019276	242.303	108.543	92.0244	-2.63303	135.033	127.29	123.203	-1.96671	226250_at	NA
PLEKHF1	1e-07	1.75e-05	111.851	37.1543	44.3434	-2.52238	50.4897	57.3963	56.8686	-1.96683	219566_at	pleckstrin homology domain containing, family F (with FYVE domain) member 1
MLL	1e-07	1.75e-05	70.1107	29.4219	23.1767	-3.02505	37.8321	38.9816	35.6184	-1.96839	220546_at	myeloid/lymphoid or mixed-lineage leukemia (trithorax homolog, Drosophila)
LCK	7e-07	8.86e-05	129.322	15.5869	41.7353	-3.09862	54.3729	62.6866	65.6061	-1.97118	204890_s_at	lymphocyte-specific protein tyrosine kinase
CBFA2T2	< 1e-07	< 1e-07	235.216	130.678	106.282	-2.21313	127.442	141.271	119.291	-1.97178	238549_at	core-binding factor, runt domain, alpha subunit 2; translocated to, 2
NA	1.5e-06	0.0001618	13.0474	7.19132	6.59313	-1.97893	6.92976	7.48706	6.61571	-1.97218	1570496_at	NA
C6orf108	7e-07	8.86e-05	54.1612	30.9993	26.172	-2.06944	29.9059	29.4095	27.4587	-1.97246	204238_s_at	chromosome 6 open reading frame 108
NA	0.0002149	0.0072663	116.318	61.8907	44.6001	-2.60803	64.5778	66.1428	58.9028	-1.97475	240315_at	NA
C6orf130	1e-07	1.75e-05	122.063	60.089	55.5645	-2.19679	66.3504	61.1712	61.7874	-1.97554	238860_at	chromosome 6 open reading frame 130
NA	1e-07	1.75e-05	56.1534	13.9913	18.035	-3.11358	22.6701	28.8169	28.413	-1.97633	229202_at	NA
PAQR8	2.04e-05	0.0011891	214.536	78.9066	73.1118	-2.93436	129.869	132.438	108.523	-1.97688	227626_at	progestin and adipoQ receptor family member VIII
ACSS1	0.0001091	0.0043636	108.526	52.8412	50.6988	-2.14061	61.9699	72.296	54.8945	-1.977	234801_s_at	acyl-CoA synthetase short-chain family member 1
MAN1C1	7.2e-06	0.0005422	28.6336	10.562	12.9481	-2.21141	11.36	17.8074	14.4808	-1.97735	218918_at	mannosidase, alpha, class 1C, member 1
NA	0.0008254	0.0193686	48.7275	27.2362	19.2524	-2.53099	26.6308	29.3752	24.6181	-1.97934	233037_at	NA
HKR1	6e-07	7.94e-05	44.4414	17.5113	17.8104	-2.49526	23.6185	23.1247	22.4252	-1.98176	231836_at	GLI-Kruppel family member HKR1
PYHIN1	9e-07	0.0001096	31.5531	5.8668	9.29201	-3.39573	12.2971	16.0664	15.917	-1.98235	240413_at	pyrin and HIN domain family, member 1
LOC641518	3e-06	0.0002711	10.7432	5.48509	5.16296	-2.08082	6.39181	6.15148	5.41486	-1.98402	243362_s_at	hypothetical protein LOC641518
NA	0.0001739	0.0062429	132.549	60.6916	41.9855	-3.15702	69.9832	65.6593	66.7794	-1.98488	244185_at	NA
NA	0.0005188	0.0140841	152.856	58.1954	50.6476	-3.01802	79.0447	87.0216	77.0029	-1.98506	232369_at	NA
CENPV	0.0001271	0.0049146	15.3825	7.14212	9.16573	-1.67827	8.16987	10.0125	7.74708	-1.98559	226611_s_at	centromere protein V
GPR171	7e-07	8.86e-05	236.363	33.172	47.2682	-5.00045	119.013	133.235	118.83	-1.98909	207651_at	G protein-coupled receptor 171
ANO9	6e-07	7.94e-05	81.6206	33.0875	31.3398	-2.60438	46.1328	41.4841	41.0195	-1.9898	227393_at	anoctamin 9
MLL	2e-07	3.18e-05	419.529	146.687	125.24	-3.34982	182.845	198.053	210.67	-1.9914	212080_at	myeloid/lymphoid or mixed-lineage leukemia (trithorax homolog, Drosophila)
CEP68	< 1e-07	< 1e-07	146.398	64.3545	58.0141	-2.5235	70.0438	83.1003	73.4808	-1.99233	212677_s_at	centrosomal protein 68kDa
FAIM3	0.000416	0.0120343	479.507	150.92	183.716	-2.61004	256.289	300.102	240.575	-1.99317	221601_s_at	Fas apoptotic inhibitory molecule 3
KIAA1704	2.4e-05	0.0013445	67.7058	28.4014	27.9746	-2.42026	39.2797	40.2531	33.9338	-1.99523	226429_at	KIAA1704
MCM3APAS	0.0004014	0.0116924	18.4902	7.30403	8.35511	-2.21304	9.22081	10.1698	9.26496	-1.99571	232740_at	MCM3AP antisense RNA (non-protein coding)
NA	1.72e-05	0.0010426	31.391	14.496	14.9932	-2.09368	19.0891	16.8907	15.7066	-1.99858	235662_at	NA
NA	0.0005996	0.015547	180.433	103.45	64.7011	-2.78872	95.181	93.3312	90.2725	-1.99876	232778_at	NA
MAP4K1	< 1e-07	< 1e-07	199.356	53.6704	60.5177	-3.29418	81.9627	104.916	99.6545	-2.00048	214339_s_at	mitogen-activated protein kinase kinase kinase kinase 1
NA	0.0009367	0.0213126	40.3718	28.0721	15.1751	-2.6604	19.3725	18.6447	20.1774	-2.00085	1564773_x_at	NA
TTC3	0.0004013	0.0116924	188.216	63.4635	63.2934	-2.9737	95.5301	86.5035	94.0437	-2.00136	208662_s_at	tetratricopeptide repeat domain 3
NA	2.1e-06	0.0002091	135.378	62.3634	56.902	-2.37914	65.7777	80.7187	67.5889	-2.00296	239476_at	NA
[truncated: 449 more rows]
