# Supplementary material for: Deconvoluting Post-Transplant Immunity: Cell Subset-Specific Mapping Reveals Pathways for Activation and Expansion of Memory T, Monocytes and B Cells
Source: PLoS One. 2010 Oct 14;5(10):e13358. doi: 10.1371/journal.pone.0013358 (PMC2954794; doi:10.1371/journal.pone.0013358)
Supplement: Table S2 — 134 multivariate whole blood genes that populate 19 significant functional pathways (0.12 MB XLS) [file pone.0013358.s004.xls]

## Sheet: 134 Sig IPA pathway multivar 
Supplemental Table S2 – 134 multivariate whole blood genes that populate 19 significant functional pathways
Gene symbol	Parametric p-value	FDR	Geom mean of intensities in Pre-Tx	Geom mean of intensities in Wk1	Geom mean of intensities in Wk2	Fold change Early	Geom mean of intensities in Wk4	Geom mean of intensities in Wk8	Geom mean of intensities in Wk12	Fold Change Late	Probeset
UPB1	3.02e-05	0.0016078	18.9947	47.1594	27.2669	1.4355	21.3097	19.7525	22.5685	1.18815	220507_s_at
UNG	0.0006837	0.0169453	76.2217	39.3856	49.6858	-1.53407	51.1125	55.179	57.2051	-1.33243	202330_s_at
TXK	4.96e-05	0.0023479	30.1256	5.24654	13.3675	-2.25364	15.0299	15.7681	17.3981	-1.73155	206828_at
TRUB2	4.12e-05	0.0020553	88.2662	55.776	50.2568	-1.7563	54.4491	57.1432	59.7499	-1.47726	223109_at
TRGV9	7e-07	8.86e-05	276.225	30.3292	80.4108	-3.43517	123.078	199.072	165.368	-1.67036	209813_x_at
TRD@	0.0006803	0.0168916	49.2207	7.14159	19.2169	-2.56132	28.7009	37.0659	37.4037	-1.31593	216191_s_at
TRD@	< 1e-07	< 1e-07	400.981	40.9926	109.319	-3.66799	202.118	282.7	277.305	-1.44599	217143_s_at
TRAT1	7.75e-05	0.0033576	8.45182	3.47318	5.28529	-1.59912	6.04366	5.47978	5.60218	-1.50867	217147_s_at
TRAP1	2e-07	3.18e-05	139.318	71.5636	69.6851	-1.99925	77.8266	85.6357	84.4503	-1.6497	201391_at
TRA@	0.0002	0.0069078	21.6652	10.291	11.575	-1.87172	15.6778	15.4453	15.6494	-1.38441	224343_x_at
TRA@	2e-07	3.18e-05	123.414	20.6528	38.3182	-3.22076	63.164	113.066	86.4246	-1.42799	213830_at
TRA@	2.9e-06	0.0002651	515.109	63.0874	154.815	-3.32725	207.425	203.934	233.77	-2.20349	211902_x_at
TRA@	5e-06	0.0004099	492.145	77.1251	143.08	-3.43966	205.566	216.06	225.329	-2.18412	209671_x_at
TRA@	8e-07	9.9e-05	668.307	69.3642	184.221	-3.62775	250.24	260.579	317.244	-2.1066	210972_x_at
TNFRSF10A	1e-07	1.75e-05	260.733	131.655	84.7392	-3.07689	124.564	125.945	144.016	-1.81045	231775_at
TLR4	0.0004023	0.0117028	34.4438	55.3731	79.4991	2.30808	62.6361	69.1149	63.6731	1.84861	1552798_a_at
SIN3A	6.92e-05	0.0030835	29.7516	13.7167	17.7943	-1.67197	18.0876	22.0471	21.1969	-1.40358	238005_s_at
SH2D1B	0.0008031	0.0190084	46.7825	19.8294	23.1828	-2.01798	35.1516	48.7085	51.4052	1.09881	1553177_at
SH2D1A	0.0004043	0.0117518	33.2312	9.91497	19.695	-1.68729	25.0659	28.5518	34.2247	1.0299	210116_at
RUVBL1	2e-07	3.18e-05	44.9871	20.4093	18.6899	-2.40703	25.5492	24.5165	28.2358	-1.59326	201614_s_at
RPUSD4	0.0009006	0.0206545	85.6571	54.0192	45.5098	-1.88217	59.0623	65.336	64.3545	-1.33102	225398_at
RPUSD2	7.34e-05	0.003226	28.0151	15.5888	16.4114	-1.70705	18.7704	19.535	17.9727	-1.55876	221940_at
RPS6	4.87e-05	0.0023174	2958.81	1460.84	1755.21	-1.68573	2206.46	1902.92	1848.91	-1.6003	209134_s_at
RPS6	0.0002319	0.0076797	2547.97	975.27	1445.04	-1.76325	1705.5	1505.54	1559.87	-1.63345	200081_s_at
RPS6	1.14e-05	0.000761	4146.02	2065.45	2322.83	-1.7849	2896.29	2768.67	2698.81	-1.53624	201254_x_at
RHOF	0.0009547	0.0216231	375.369	214.456	233.544	-1.60727	262.702	261.574	279.04	-1.34522	219045_at
RHOB	5.57e-05	0.0025852	201.535	331.871	480.607	2.38473	371.145	580.382	471.835	2.3412	212099_at
RASGRP1	1e-07	1.75e-05	99.187	13.3032	28.3772	-3.49531	52.5488	62.8689	70.6502	-1.40392	205590_at
RARA	0.0008328	0.0195087	4.84682	5.97651	7.52101	1.55174	5.98119	4.91721	5.68082	1.17207	1565358_at
QARS	1.35e-05	0.0008613	999.004	597.776	540.041	-1.84987	662.818	667.671	706.682	-1.41365	217846_at
PUS1	0.0001237	0.0048137	38.6922	18.8268	21.3939	-1.80856	22.7428	27.0363	26.2977	-1.47132	218670_at
PTPN7	0.0002725	0.0086874	153.661	83.5132	88.6982	-1.7324	96.8276	100.061	96.4342	-1.59343	204852_s_at
PSMC2	1.83e-05	0.0010947	72.8418	34.0391	41.6749	-1.74786	55.0206	55.9202	56.5901	-1.28718	201067_at
PRPS1	0.0002484	0.0080793	24.3336	13.7593	17.3156	-1.4053	16.4256	12.5776	14.3588	-1.69468	208447_s_at
PRPS1	1.78e-05	0.0010706	126.877	47.8248	68.8526	-1.84274	81.1753	92.8693	87.263	-1.45396	209440_at
PRKCQ	0.0003158	0.0097416	44.2762	16.7048	21.6091	-2.04896	25.0675	28.024	29.763	-1.48763	210039_s_at
PRKCQ	< 1e-07	< 1e-07	92.8496	15.4731	33.4901	-2.77245	41.1315	47.9487	54.8951	-1.6914	210038_at
PRKCH	2.5e-06	0.0002369	154.986	24.1053	54.3182	-2.85329	67.8533	97.5316	106.534	-1.45479	218764_at
PRIM1	0.0009984	0.0223079	31.0341	13.8822	14.9969	-2.06937	18.7996	20.3732	18.5168	-1.676	205053_at
PRF1	5e-07	6.78e-05	779.463	82.6202	200.614	-3.88538	300.518	438.331	444.613	-1.75313	214617_at
PPP3CC	0.0001288	0.0049733	27.7034	11.7906	13.4685	-2.05689	15.9807	18.1741	20.8548	-1.3284	32541_at
PPP2R2B	1e-06	0.0001186	8.64516	4.58962	6.07754	-1.42248	6.12557	6.65114	6.99348	-1.23617	213849_s_at
PPP2R1B	7.36e-05	0.003227	85.2145	39.7197	28.8402	-2.95471	35.8512	33.9509	31.8999	-2.67131	222351_at
PPAT	0.0002918	0.0091638	29.9152	13.6767	14.0352	-2.13144	18.9983	15.8868	17.7739	-1.68309	209433_s_at
POLRMT	1.47e-05	0.0009217	93.0347	47.0589	42.4867	-2.18974	50.7425	61.6749	54.7067	-1.70061	203782_s_at
POLR3A	3.44e-05	0.0017913	93.9666	66.5913	57.0407	-1.64736	65.3015	70.773	73.9992	-1.26983	231763_at
POLR3A	< 1e-07	< 1e-07	62.3027	44.8513	34.5394	-1.80382	38.144	41.8219	40.0901	-1.55407	227872_at
POLR2H	0.0002627	0.0084192	80.2987	47.8693	48.1895	-1.66631	57.6915	68.7826	58.3306	-1.37661	209302_at
POLR1E	0.0001995	0.0068949	64.5456	39.2213	36.5808	-1.76447	40.0683	38.0987	40.0488	-1.61167	218997_at
POLR1C	1.5e-06	0.0001618	72.3106	45.7043	40.1963	-1.79894	51.8877	51.9769	49.9628	-1.44729	209317_at
POLH	6e-07	7.94e-05	17.8563	12.4237	10.6889	-1.67055	13.7777	13.1612	14.4772	-1.23341	233852_at
POLG	5.9e-06	0.0004648	101.358	69.8754	63.8393	-1.58771	66.8882	70.2204	71.016	-1.42726	203366_at
POLD2	0.000458	0.0129145	98.9768	58.7484	55.0369	-1.79837	65.7435	71.2262	53.3958	-1.85364	201115_at
PIK3R1	0.0008152	0.0192234	21.6825	15.7609	12.8661	-1.68524	14.3957	15.6025	13.8875	-1.5613	212249_at
PIK3R1	0.0002155	0.0072799	154.045	71.7419	71.482	-2.15502	96.9445	113.629	109.269	-1.40977	212239_at
PDE7A	0.000168	0.006067	85.066	50.5741	37.2843	-2.28155	51.7862	59.1226	47.9433	-1.7743	1552343_s_at
PARP6	0.000267	0.008542	183.103	128.654	125.442	-1.45966	121.254	135.911	138.879	-1.31844	219639_x_at
PARP15	1.05e-05	0.0007203	13.9112	7.70489	7.2569	-1.91697	7.53079	12.1013	10.4075	-1.33665	1564310_a_at
PARP1	0.0002472	0.008045	77.074	40.1328	45.3176	-1.70075	49.0714	63.0872	61.5872	-1.25146	208644_at
PAICS	9.2e-06	0.0006499	59.2615	23.9984	26.2747	-2.25546	41.1732	44.5525	43.6839	-1.3566	201013_s_at
NME3	0.0002172	0.0073079	183.802	121.679	105.908	-1.73549	121.862	117.942	121.061	-1.51827	204862_s_at
NFKB2	0.0006357	0.0160986	94.515	138.8	92.7624	-1.01889	94.6973	86.4115	83.8405	-1.12732	209636_at
NAPEPLD	2.1e-05	0.0012112	19.7975	8.92513	8.37727	-2.36324	10.1133	11.6705	10.9699	-1.8047	233539_at
NAPEPLD	0.0007534	0.0181856	106.511	51.5525	30.9978	-3.43609	43.978	48.7728	49.1155	-2.16859	238722_x_at
MYST4	0.0007512	0.0181493	134.75	50.9052	53.7283	-2.50799	71.2995	79.1637	78.494	-1.71669	212462_at
MYO9A	8.48e-05	0.0035969	127.866	77.459	66.7699	-1.91503	84.067	85.3954	88.4931	-1.44493	219027_s_at
MYO9A	7.4e-06	0.000555	19.1219	8.43485	6.98029	-2.73941	10.652	10.2136	8.39651	-2.27736	242512_at
MAX	0.0009912	0.0222144	38.6255	52.7157	73.7412	1.90913	60.2501	47.1172	53.2214	1.37788	208403_x_at
MAPK14	0.0003661	0.0108904	71.0584	152.114	127.115	1.78887	101.96	101.509	104.004	1.46364	211561_x_at
MAP2K5	7.16e-05	0.0031647	66.9802	55.0472	40.0656	-1.67176	49.7124	49.4722	47.1581	-1.42033	204756_at
LCK	7e-07	8.86e-05	129.322	15.5869	41.7353	-3.09862	54.3729	62.6866	65.6061	-1.97118	204890_s_at
LCK	< 1e-07	< 1e-07	879.667	55.869	160.278	-5.48837	298.245	383.96	366.321	-2.40136	204891_s_at
LAT	8.1e-06	0.0005929	199.66	82.1016	89.7616	-2.22434	104.786	102.258	120.383	-1.65855	209881_s_at
LAT	< 1e-07	< 1e-07	342.154	52.1716	85.3646	-4.00815	123.641	130.999	143.7	-2.38102	211005_at
LARS	0.0005428	0.014491	112.46	51.123	61.6289	-1.82479	70.6908	83.6879	84.6387	-1.32871	222427_s_at
LARS	1.51e-05	0.0009392	97.6439	53.1493	48.3651	-2.01889	63.116	75.3129	75.3732	-1.29547	222428_s_at
KLRD1	0.0001342	0.005131	47.6259	10.7745	20.8121	-2.28838	26.3101	37.286	32.5518	-1.46308	207795_s_at
KLRD1	4.95e-05	0.0023452	125.559	21.2952	50.2928	-2.49656	69.4256	92.7209	83.3224	-1.50691	210606_x_at
KLRC2	0.0002252	0.0075032	23.2183	5.56218	9.7697	-2.37656	19.7261	18.0882	19.9535	-1.16362	206785_s_at
KIR3DL3	0.0006009	0.0155602	42.21	21.6977	24.9732	-1.69021	24.4068	30.0085	27.6407	-1.5271	216676_x_at
KIR3DL2	5.55e-05	0.0025825	41.7518	11.3594	14.1652	-2.94748	14.9667	18.4085	17.5083	-2.38468	207314_x_at
KIR2DS5	0.0008208	0.0192937	65.8499	38.1621	44.0056	-1.4964	49.6442	50.4787	50.6792	-1.29935	208203_x_at
KIR2DS2	0.0002092	0.0071488	27.2473	11.2032	13.6901	-1.99029	13.8972	16.7504	15.8181	-1.72254	211532_x_at
KIR2DL2	0.0009571	0.0216506	46.4321	22.7214	26.3205	-1.7641	31.1791	32.3176	31.6217	-1.46836	211397_x_at
KIR2DL1	1.03e-05	0.0007093	30.8566	16.4847	19.1197	-1.61386	17.587	19.8819	19.4472	-1.58668	210890_x_at
KAT2B	0.0005481	0.0146111	64.2312	46.9293	24.551	-2.61624	35.0974	34.6581	31.399	-2.04564	239585_at
ITPA	0.0008827	0.0203721	174.617	109.722	108.074	-1.61572	122.566	133.469	130.014	-1.34306	209171_at
IMPDH2	0.0005374	0.0144014	273.513	125.503	118.421	-2.30967	156.684	153.149	156.637	-1.74616	201892_s_at
IL2RB	1.1e-06	0.0001266	426.128	70.3805	189.642	-2.24701	297.902	418.301	392.593	-1.08542	205291_at
IGHG3	3e-07	4.57e-05	143.497	76.4787	44.346	-3.23585	33.4615	42.1369	35.495	-4.04274	211430_s_at
ICOS	4.78e-05	0.0022885	13.2787	7.16039	7.37346	-1.80088	9.64769	8.2794	8.84559	-1.50117	210439_at
ICAM1	0.0005651	0.0149044	66.2815	139.595	76.2331	1.15014	76.7985	83.4236	73.9425	1.11558	202638_s_at
HARS	4e-07	5.79e-05	137.472	79.1437	77.9796	-1.76293	77.4849	93.9063	89.8959	-1.52924	202042_at
GZMB	9.05e-05	0.0037628	807.589	165.037	280.731	-2.87674	404.383	459.256	432.485	-1.86732	210164_at
GUCY1B3	0.0002129	0.0072255	5.68835	9.49418	14.5164	2.55194	12.1568	10.5688	14.0874	2.47654	203817_at
GSS	0.000841	0.0196382	77.9539	49.884	54.4671	-1.43121	56.3414	58.3184	56.2895	-1.38487	211630_s_at
GOT2	2.4e-06	0.0002294	142.233	70.8044	78.5087	-1.81169	91.3511	103.654	101.864	-1.39631	200708_at
GNPNAT1	7.23e-05	0.0031897	43.0129	21.8981	22.5768	-1.90518	31.9138	35.1435	31.7768	-1.35359	225853_at
GNB2L1	1.99e-05	0.0011712	74.6023	42.6753	34.1546	-2.18426	43.4442	46.9024	46.8202	-1.59338	222034_at
GNB1L	4.85e-05	0.0023099	68.4876	48.1243	38.636	-1.77264	46.9307	52.9841	45.6107	-1.50157	226204_at
GLS	3.5e-06	0.0003077	87.881	42.5243	34.7384	-2.52979	42.7771	44.4586	43.0477	-2.04148	223080_at
GART	0.0004965	0.0136991	99.668	40.8006	31.8815	-3.1262	58.1184	55.1211	51.6785	-1.92862	230097_at
GARS	0.0004541	0.0128642	354.793	251.81	220.029	-1.61248	228.659	221.245	250.75	-1.41493	208693_s_at
FYN	7e-07	8.86e-05	994.626	381.671	417.189	-2.38411	471	614.447	582.457	-1.70764	210105_s_at
FYN	1.8e-06	0.0001867	281.091	84.2235	81.41	-3.45278	120.529	144.659	132.702	-2.1182	1559101_at
FNBP1	9.09e-05	0.0037737	630.771	467.547	391.782	-1.61	446.062	399.303	412.906	-1.52764	213940_s_at
FHIT	2.51e-05	0.0013932	38.5897	14.5174	14.9897	-2.57441	18.3581	16.3662	13.3292	-2.89512	206492_at
FARSB	8.1e-05	0.0034817	153.237	90.7348	88.6838	-1.7279	105.258	112.298	106.746	-1.43553	223035_s_at
FARSB	1e-07	1.75e-05	14.6833	5.8373	4.9357	-2.97491	7.5718	6.53079	6.24938	-2.34956	223036_at
FARSA	8.71e-05	0.0036745	87.6024	65.932	53.8978	-1.62534	62.2613	57.2909	64.5913	-1.35626	202159_at
EPRS	8.78e-05	0.0036842	126.749	69.9897	73.5827	-1.72254	91.0404	93.8661	98.2809	-1.28966	200843_s_at
ENTPD6	0.0005112	0.013954	129.614	90.2161	71.8107	-1.80494	81.8867	93.8638	81.5946	-1.58851	201704_at
EIF3H	0.0002603	0.0083947	1038.04	569.053	758.575	-1.36841	813.864	837.662	831.793	-1.24796	201592_at
EIF3B	1e-06	0.0001186	72.8835	25.3445	27.302	-2.66953	30.7219	33.8297	35.6892	-2.04217	242550_at
EIF3B	4.99e-05	0.002356	81.8843	39.2351	30.583	-2.67745	38.3187	33.0512	38.5676	-2.12314	236274_at
DTYMK	0.0007308	0.0178059	45.2357	31.6336	27.7305	-1.63126	34.0449	33.698	33.6118	-1.34583	203270_at
DTYMK	2.18e-05	0.0012442	94.7022	54.857	51.1739	-1.8506	58.5616	61.133	63.0181	-1.50278	1553984_s_at
DLG3	4.41e-05	0.0021452	48.2793	28.6628	32.2573	-1.49669	34.6232	32.1606	36.0946	-1.33758	212727_at
DGKZ	0.0003025	0.009408	713.274	594.644	454.56	-1.56915	428.666	381.617	390.819	-1.82507	207556_s_at
DDIT4	1.1e-06	0.0001266	130.616	28.5974	29.6218	-4.40944	39.7679	40.3243	40.1141	-3.2561	202887_s_at
DCTD	0.0004861	0.0134706	67.4997	32.3543	33.401	-2.02089	43.402	53.4382	50.34	-1.34088	201572_x_at
DARS	0.0005452	0.0145409	772.217	487.994	426.105	-1.81227	609.539	590.648	566.908	-1.36216	201623_s_at
CYCS	3.2e-06	0.0002864	22.2411	7.48449	6.43103	-3.45841	9.59816	7.73346	10.1898	-2.18269	244546_at
CLTCL1	2.95e-05	0.0015766	16.8777	38.1805	26.1744	1.55083	25.0789	19.8487	19.5867	1.16051	205944_s_at
CDK6	0.0001651	0.005982	55.2963	32.1329	37.1596	-1.48808	40.1194	39.6934	44.2955	-1.24835	224848_at
CDK4	0.000121	0.0047492	120.716	51.2686	57.7496	-2.09034	71.1555	77.6544	76.3807	-1.58045	202246_s_at
CD8B	2.3e-06	0.0002238	180.056	41.9763	61.0747	-2.94813	89.5323	134.741	111.157	-1.61983	207979_s_at
CD8B	2.7e-06	0.0002515	61.1268	10.4123	13.5473	-4.51209	23.0309	27.0675	26.9082	-2.27168	215332_s_at
CD40LG	2.3e-06	0.0002238	55.1707	28.8824	37.1503	-1.48507	38.6106	43.6269	42.6097	-1.29479	207892_at
CD3E	1e-07	1.75e-05	121.243	23.2299	36.2932	-3.34066	54.349	70.2338	59.7502	-2.02917	205456_at
CD28	0.0001101	0.004394	10.1519	4.58818	6.92194	-1.46662	7.46656	6.95667	8.61297	-1.17867	206545_at
CASP9	0.0003901	0.0114424	100.918	141.696	143.429	1.42125	128.394	125.654	130.258	1.29074	203984_s_at
CASP6	5.4e-06	0.0004355	77.2486	36.7412	41.4845	-1.86211	46.9194	48.7303	48.0441	-1.60787	209790_s_at
CASP6	3.8e-06	0.0003277	100.942	69.8717	53.1585	-1.89889	65.8126	68.7477	61.8703	-1.63152	211464_x_at
CASK	4.1e-06	0.0003475	12.7428	6.43218	7.39572	-1.72299	7.93736	8.68062	8.3728	-1.52192	227156_at
CARD11	1.6e-06	0.0001712	101.278	58.4891	58.8945	-1.71964	63.5102	68.2624	67.5885	-1.49845	223514_at
CARD11	7e-07	8.86e-05	31.4411	12.4009	12.3619	-2.54339	15.4823	16.8368	17.8128	-1.76508	1562368_at
CAPN2	0.0006858	0.0169894	27.4165	14.114	17.5006	-1.5666	18.5667	19.3574	19.4739	-1.40786	214888_at
CAMK4	1e-07	1.75e-05	10.4982	3.89873	4.69188	-2.23753	4.88198	5.15393	4.98453	-2.10616	241871_at
CALM1	1.5e-06	0.0001618	1037.3	737.245	660.718	-1.56995	719.851	751.54	866.405	-1.19724	200655_s_at
CAD	6.1e-06	0.0004751	63.344	34.4055	31.8244	-1.99042	41.0364	42.6441	44.2847	-1.43038	202715_at
BCL2L11	0.0006413	0.0161755	8.90502	11.6105	12.34	1.38573	9.69889	9.50059	8.74497	-1.0183	222343_at
BCL2	1e-07	1.75e-05	58.6242	9.05522	18.1121	-3.23674	26.5368	34.592	30.8722	-1.89894	203685_at
ATP5G1	0.000651	0.0163423	265.256	192.798	154.939	-1.71201	196.565	188.158	173.665	-1.5274	208972_s_at
ATIC	1.16e-05	0.0007716	167.932	60.4081	71.5368	-2.34749	89.0601	104.287	99.6127	-1.68584	208758_at
ASS1	9.2e-06	0.0006499	16.209	8.44313	9.42242	-1.72026	10.8818	11.4896	10.457	-1.55006	207076_s_at
ASNS	1.42e-05	0.0008976	81.7472	28.4738	32.1437	-2.54318	33.489	30.7911	42.8204	-1.90907	205047_s_at
ARPC5L	8.22e-05	0.0035167	342.975	200.919	191.571	-1.79033	227.029	259.981	264.107	-1.29862	220966_x_at
ARPC5L	1e-07	1.75e-05	206.112	116.043	102.974	-2.00158	127.786	143.854	144.355	-1.42781	226915_s_at
APRT	0.0002418	0.0079164	535.605	322.652	254.83	-2.10181	340.842	343.1	357.917	-1.49645	213892_s_at
AKT3	0.0006065	0.0156148	19.0719	9.03407	13.6212	-1.40016	13.7189	18.1384	15.7733	-1.20912	212607_at
AKT3	0.0004678	0.0131164	56.8961	37.7112	32.8268	-1.73322	41.6036	45.6682	45.4171	-1.25275	212609_s_at
AKT3	3.3e-06	0.0002943	18.2672	8.04726	6.93382	-2.63451	10.3592	10.9945	9.94508	-1.83681	242876_at
AK5	2e-07	3.18e-05	26.731	11.7271	12.1151	-2.20642	12.7652	13.0977	12.1668	-2.19705	222862_s_at
AK3L1	1.34e-05	0.0008579	6.10035	8.20284	6.8656	1.12544	7.7747	8.06103	8.05316	1.32012	225342_at
AFG3L2	0.0003473	0.0104306	70.025	49.2596	52.5732	-1.33195	57.8758	58.1506	54.8935	-1.27565	202486_at
AFG3L2	0.0003308	0.0100592	48.9652	34.6794	25.1355	-1.94805	28.3037	28.196	29.1446	-1.68008	232919_at
ADSL	9.83e-05	0.0040229	204.589	121.883	110.526	-1.85106	144.741	145.349	144.543	-1.41543	202144_s_at
ADARB1	0.0009035	0.0207036	40.5533	16.3767	20.423	-1.98566	24.4365	31.7687	29.1256	-1.39236	203865_s_at
ADAM23	0.00056	0.0148128	5.19464	4.41623	4.37895	-1.18627	4.32961	4.55324	4.16943	-1.24589	244463_at
ADA	0.0002264	0.0075295	108.151	50.0736	63.6381	-1.69947	90.344	95.8476	102.783	-1.05222	216705_s_at
ADA	< 1e-07	< 1e-07	196.794	73.1822	79.0367	-2.4899	121.607	138.566	157.486	-1.24959	204639_at
AARSD1	0.0002447	0.0079827	40.2819	23.6661	24.5259	-1.64242	22.2029	27.088	25.1404	-1.60228	222064_s_at
AARS2	2.2e-06	0.0002156	75.2954	37.8324	39.0937	-1.92602	41.0012	42.8617	41.9176	-1.79627	231845_at
AARS	2.7e-06	0.0002515	150.836	85.7393	84.0281	-1.79507	92.9595	103.508	101.833	-1.48121	201000_at
