# Supplementary material for: Deconvoluting Post-Transplant Immunity: Cell Subset-Specific Mapping Reveals Pathways for Activation and Expansion of Memory T, Monocytes and B Cells
Source: PLoS One. 2010 Oct 14;5(10):e13358. doi: 10.1371/journal.pone.0013358 (PMC2954794; doi:10.1371/journal.pone.0013358)
Supplement: Table S3 — Significant pathways (p<0.05) identified in Ingenuity Pathway Analysis populated by genes from whole blood as a function of the serial time points sampled (0.05 MB XLS) [file pone.0013358.s005.xls]

## Sheet: Whole Blood Pathways
Supplemental table S3 - significant pathways identified in Ingenuity populated by genes from whole blood as a function of the serial time points sampled.
Ingenuity Canonical Pathways	AnalysisName	P-value	% populated	Molecules	Molecules	Molecules	Molecules	Molecules	Molecules	Molecules	Molecules	Molecules	Molecules	Molecules	Molecules	Molecules	Molecules	Molecules	Molecules	Molecules	Molecules	Molecules	Molecules	Molecules	Molecules	Molecules	Molecules	Molecules	Molecules	Molecules	Molecules	Molecules	Molecules	Molecules	Molecules	Molecules	Molecules	Molecules	Molecules	Molecules
iCOS-iCOSL Signaling in T Helper Cells	Pre-Tx_vs_week 1	2.63027e-08	23.1	PIK3R1	LCK	TRA@	TRD@	AKT3	CAMK4	PIK3C2B	IL2RB	PLCG1	CD3D	PRKCQ	ZAP70	CD28	CD40LG	TRGV9	ITPR3	PLEKHA1	CD3E	CALM1	NFATC2	TRAT1	CD247	ICOS	LAT	PPP3CC
iCOS-iCOSL Signaling in T Helper Cells	Pre-Tx_vs_week 2	2.88403e-06	19.4	CD3G	PIK3R1	TRA@	LCK	TRD@	AKT3	ITPR3	CAMK4	PIK3C2B	PLEKHA1	PLCG1	CD3E	CALM1	CD3D	ZAP70	PRKCQ	SHC1	CD247	ICOS	LAT	PPP3CC
iCOS-iCOSL Signaling in T Helper Cells	Pre-Tx_vs_week 4	9.33254e-05	12	LCK	TRA@	CD40LG	CAMK4	ITPR3	PLEKHA1	NFATC1	PLCG1	CD3D	CALM1	NFATC2	ZAP70	LAT
iCOS-iCOSL Signaling in T Helper Cells	Pre-Tx_vs_week 8	0.00331131	8.33	CD3G	LCK	PLCG1	CALM1	CD3D	NFATC2	ZAP70	LAT	PLEKHA1
T Cell Receptor Signaling	Pre-Tx_vs_week 1	2.63027e-08	23.1	PIK3R1	TRA@	LCK	CD8B	RASGRP1	TXK	FYN	CD8A	CAMK4	PIK3C2B	RRAS2	CARD11	PLCG1	CD3E	CALM1	CD3D	NFATC2	ZAP70	PRKCQ	CD247	LAT	PPP3CC	CD28	PTPN7
T Cell Receptor Signaling	Pre-Tx_vs_week 2	1.07152e-05	19.2	CD3G	PIK3R1	TRA@	LCK	CD8B	FYN	CAMK4	PIK3C2B	HRAS	CARD11	PLCG1	CD3E	CALM1	CD3D	ZAP70	PRKCQ	CD247	LAT	PPP3CC	PTPN7
T Cell Receptor Signaling	Pre-Tx_vs_week 4	0.000363078	11.5	NFATC1	TRA@	LCK	CARD11	PLCG1	CALM1	CD3D	NFATC2	ZAP70	FYN	LAT	CAMK4
T Cell Receptor Signaling	Pre-Tx_vs_week 8	0.000891251	9.62	CD3G	LCK	CARD11	PLCG1	CALM1	CD3D	NFATC2	ZAP70	FYN	LAT
Natural Killer Cell Signaling	Pre-Tx_vs_week 1	4.89779e-08	25.9	PIK3R1	LCK	PRKCH	KIR2DL5A	SH2D1A	KLRD1	AKT3	CD244	PIK3C2B	PLCG1	KLRC2	ZAP70	PRKCQ	SH2D1B	KIR2DL4	KIR2DS2	KIR3DL3	KIR2DL1	FYN	KLRC3	KIR2DS5	RRAS2	KIR3DL2	NCR3	KIR2DL2	KLRK1	CD247	LAT
Natural Killer Cell Signaling	Pre-Tx_vs_week 2	0.00154882	14.8	PIK3R1	HCST	LCK	AKT3	FYN	CD244	PIK3C2B	HRAS	PLCG1	KLRC2	ZAP70	PRKCQ	SHC1	KLRK1	CD247	LAT
Cytotoxic T Lymphocyte-mediated Apoptosis of Target Cells	Pre-Tx_vs_week 1	2.51189e-07	42.9	TRA@	CYCS (includes EG:54205)	TRGV9	DFFA	CD3E	CD3D	PRF1	BCL2	TRD@	CASP6	CD247	GZMB
Cytotoxic T Lymphocyte-mediated Apoptosis of Target Cells	Pre-Tx_vs_week 2	3.16228e-06	35.7	CD3G	TRA@	CYCS (includes EG:54205)	CD3E	CD3D	PRF1	BCL2	TRD@	CASP6	CD247
Cytotoxic T Lymphocyte-mediated Apoptosis of Target Cells	Pre-Tx_vs_week 4	0.00229087	17.9	TRA@	CYCS (includes EG:54205)	CD3D	PRF1	CASP6
Cytotoxic T Lymphocyte-mediated Apoptosis of Target Cells	Pre-Tx_vs_week 8	0.00676083	14.3	CD3G	CYCS (includes EG:54205)	CD3D	CASP6
Calcium-induced T Lymphocyte Apoptosis	Pre-Tx_vs_week 1	5.88844e-07	28.8	TRA@	LCK	PRKCH	TRGV9	TRD@	CAMK4	ITPR3	CAPN2	PLCG1	CD3E	CALM1	CD3D	NFATC2	PRKCQ	ZAP70	CD247	PPP3CC
Calcium-induced T Lymphocyte Apoptosis	Pre-Tx_vs_week 2	2.0893e-05	23.7	CD3G	LCK	TRA@	TRD@	CAMK4	ITPR3	PLCG1	CD3E	CALM1	CD3D	PRKCQ	ZAP70	CD247	PPP3CC
Calcium-induced T Lymphocyte Apoptosis	Pre-Tx_vs_week 4	0.00025704	15.3	TRA@	LCK	PLCG1	CALM1	CD3D	NFATC2	ZAP70	ITPR3	CAMK4
Calcium-induced T Lymphocyte Apoptosis	Pre-Tx_vs_week 8	0.00162181	11.9	CD3G	LCK	PLCG1	CALM1	CD3D	NFATC2	ZAP70
CD28 Signaling in T Helper Cells	Pre-Tx_vs_week 1	1.04713e-05	19.5	PIK3R1	TRA@	LCK	TRGV9	TRD@	AKT3	FYN	ITPR3	CAMK4	PIK3C2B	ARPC5L (includes EG:81873)	CARD11	PLCG1	CD3E	CALM1	CD3D	NFATC2	ZAP70	PRKCQ	CD247	LAT	PPP3CC	CD28
CD28 Signaling in T Helper Cells	Pre-Tx_vs_week 2	4.7863e-05	17.8	CD3G	PIK3R1	TRA@	LCK	TRD@	AKT3	FYN	ITPR3	CAMK4	PIK3C2B	ARPC5L (includes EG:81873)	CARD11	PLCG1	CD3E	CALM1	CD3D	ZAP70	PRKCQ	CD247	LAT	PPP3CC
CD28 Signaling in T Helper Cells	Pre-Tx_vs_week 4	0.000251189	11.9	LCK	TRA@	FYN	CAMK4	ITPR3	NFATC1	ARPC5L (includes EG:81873)	PLCG1	CARD11	CALM1	CD3D	NFATC2	ZAP70	LAT
CD28 Signaling in T Helper Cells	Pre-Tx_vs_week 8	0.00186209	9.32	CD3G	ARPC5L (includes EG:81873)	LCK	CARD11	PLCG1	CALM1	CD3D	NFATC2	ZAP70	FYN	LAT
CTLA4 Signaling in Cytotoxic T Lymphocytes	Pre-Tx_vs_week 1	0.000109648	18.9	PIK3R1	TRA@	LCK	TRGV9	TRD@	AKT3	FYN	PIK3C2B	PLCG1	CD3E	CD3D	ZAP70	PPP2R2B	TRAT1	CD247	LAT	CD28
CTLA4 Signaling in Cytotoxic T Lymphocytes	Pre-Tx_vs_week 2	0.000141254	17.8	CD3G	PIK3R1	TRA@	LCK	PPP2R1B	TRD@	AKT3	FYN	PPP2R5C	PIK3C2B	PLCG1	CD3E	CD3D	ZAP70	CD247	LAT
CTLA4 Signaling in Cytotoxic T Lymphocytes	Pre-Tx_vs_week 4	0.0131826	8.89	TRA@	LCK	PPP2R1B	PLCG1	CD3D	ZAP70	FYN	LAT
CTLA4 Signaling in Cytotoxic T Lymphocytes	Pre-Tx_vs_week 8	0.000954993	10	CD3G	LCK	PPP2R1B	PLCG1	CD3D	ZAP70	FYN	AP2A2	LAT
CTLA4 Signaling in Cytotoxic T Lymphocytes	Pre-Tx_vs_week 12	0.020893	7.78	PPP2R1B	PLCG1	ZAP70	AKT2	PPP2R5C	LAT	AP1G2
CCR5 Signaling in Macrophages	Pre-Tx_vs_week 1	0.000436516	17.9	CCL4	TRA@	PRKCH	CCR5	TRGV9	TRD@	CAMK4	GNB1L	PLCG1	CD3E	CALM1	CD3D	PRKCQ	CD247
CCR5 Signaling in Macrophages	Pre-Tx_vs_week 2	0.00177828	15.4	CD3G	TRA@	PLCG1	CD3E	CALM1	CD3D	TRD@	PRKCQ	GNB2L1	CD247	CAMK4	GNB1L
CCR5 Signaling in Macrophages	Pre-Tx_vs_week 4	0.040738	7.69	TRA@	PLCG1	CALM1	CD3D	CAMK4	GNB1L
Aminoacyl-tRNA Biosynthesis	Pre-Tx_vs_week 1	0.000457088	22.5	EPRS	QARS	YARS	VARS	HARS	AARS2	LARS	AARS	FARSB
Aminoacyl-tRNA Biosynthesis	Pre-Tx_vs_week 2	7.07946e-05	27.5	DARS	EPRS	QARS	YARS	VARS	HARS	AARS2	LARS	FARSA	AARS	FARSB
Aminoacyl-tRNA Biosynthesis	Pre-Tx_vs_week 4	0.00125893	17.5	AARSD1	EPRS	HARS	GARS	AARS2	AARS	FARSB
Aminoacyl-tRNA Biosynthesis	Pre-Tx_vs_week 8	0.0295121	12.5	QARS	GARS	AARS2	FARSA	FARSB
Aminoacyl-tRNA Biosynthesis	Pre-Tx_vs_week 12	0.0371535	12.5	VARS	HARS	GARS	AARS2	FARSB
Pyrimidine Metabolism	Pre-Tx_vs_week 1	0.00060256	17.1	PRIM2	RPUSD2	ITPA	POLR1C	CAD	EIF2AK4	NME3	POLH	CTPS2	TRUB1	UCKL1	UNG	POLR2H	POLR3A	POLD2	PUS1	DTYMK	NME2	DCTD	POLG	TRUB2	AK3	POLRMT	POLR1B	NME1	POLR1E
Pyrimidine Metabolism	Pre-Tx_vs_week 2	0.00446684	14.5	RPUSD4	POLR2H	POLR3A	RPUSD2	ITPA	POLR2I	POLD2	CAD	POLR1C	PUS1	ENTPD6	NME2	DTYMK	NME3	POLG	TRUB2	POLH	POLRMT	CTPS2	PRIM1	NME1	POLR1E
Pyrimidine Metabolism	Pre-Tx_vs_week 12	0.0354813	6.58	POLR3A	POLD2	POLA2	POLR2F	POLR1C	POLR1E	ENTPD6	POLE	TRUB2	POLG
Purine Metabolism	Pre-Tx_vs_week 1	0.00060256	11.8	PRIM2	ADSL	ITPA	PSMC2	POLR1C	CASK	TRAP1	NME3	EIF2AK4	POLH	AFG3L2	RUVBL1	GART	PAICS	CARD11	APRT	MYO9A	POLR3A	POLR2H	POLD2	PPAT	NME2	POLG	AK3	POLRMT	AK5	ADA	PRPS1	ATIC	POLR1B	IMPDH2	FHIT	DDX39	NME1	DLG3	POLR1E
Purine Metabolism	Pre-Tx_vs_week 2	9.54993e-05	12.2	ADSL	ITPA	POLR2I	POLR1C	CASK	GMPS	TRAP1	ATP5G1	RUVBL2	NME3	POLH	AFG3L2	RUVBL1	GART	PAICS	CARD11	APRT	MYO9A	POLR3A	POLR2H	POLD2	ENTPD6	NME2	POLG	POLRMT	AK5	ADA	ATIC	PDE4A	IMPDH2	PRIM1	DDX39	NME1	DLG3	POLR1E	ATP5G2	PDE7A
Purine Metabolism	Pre-Tx_vs_week 8	0.025704	4.93	PDE6B	POLR3A	POLR2I	ATP5G1	NME3	POLG	AFG3L2	AK5	RUVBL1	PRPS1	APRT	CARD11	DLG3	POLR1E	MYO9A
Purine Metabolism	Pre-Tx_vs_week 12	0.00288403	6.25	PDE6B	POLR3A	POLD2	POLR1C	TRAP1	ATP5G1	ENTPD6	POLG	POLE	AFG3L2	AK5	PRPS1	CARD11	FHIT	POLA2	POLR2F	POLR1E	PDE7A	MYO9A
Role of NFAT in Regulation of the Immune Response	Pre-Tx_vs_week 1	0.000676083	13.7	PIK3R1	LCK	TRA@	TRD@	AKT3	CAMK4	PIK3C2B	PLCG1	CD3D	PRKCQ	ZAP70	CSNK1E	CD28	TRGV9	FYN	ITPR3	GNB1L	RRAS2	CD3E	CALM1	RCAN3	NFATC2	CD247	LAT	PPP3CC
Role of NFAT in Regulation of the Immune Response	Pre-Tx_vs_week 2	0.000891251	13.1	CD3G	PIK3R1	TRA@	LCK	TRD@	AKT3	FYN	GNB2L1	ITPR3	CAMK4	GNB1L	PIK3C2B	HRAS	PLCG1	CD3E	CALM1	RCAN3	CD3D	ZAP70	PRKCQ	CD247	LAT	CSNK1E	PPP3CC
Role of NFAT in Regulation of the Immune Response	Pre-Tx_vs_week 4	0.0040738	8.2	TRA@	LCK	FYN	CAMK4	ITPR3	GNB1L	NFATC1	PLCG1	CALM1	CD3D	RCAN3	NFATC2	ZAP70	CSNK1E	LAT
Role of NFAT in Regulation of the Immune Response	Pre-Tx_vs_week 8	0.0301995	6.01	CD3G	LCK	PLCG1	CALM1	CD3D	RCAN3	NFATC2	ZAP70	FYN	LAT	CSNK1E
Glutamate Metabolism	Pre-Tx_vs_week 1	0.00165959	21.6	EPRS	QARS	GOT2	PPAT	CAD	GLS	GNPNAT1	GSS
Glutamate Metabolism	Pre-Tx_vs_week 2	0.00190546	21.6	EPRS	QARS	GOT2	CAD	GMPS	GLS	GNPNAT1	GSS
EIF2 Signaling	Pre-Tx_vs_week 1	0.00245471	14.8	EIF1AX	PIK3R1	EIF2B3	EIF2B4	AKT3	EIF3H	EIF2AK4	EIF3B	PIK3C2B	EIF2B5	RRAS2	EIF3E	EIF3G
EIF2 Signaling	Pre-Tx_vs_week 2	0.0467735	11.4	EIF2B5	PIK3R1	HRAS	EIF2B4	EIF3C	AKT3	SHC1	EIF3B	EIF3G	PIK3C2B
Non-Small Cell Lung Cancer Signaling	Pre-Tx_vs_week 1	0.00416869	15.1	PIK3R1	RRAS2	PLCG1	CDK4	CDK6	FHIT	SIN3A	AKT3	ERBB2	ITPR3	PIK3C2B
mTOR Signaling	Pre-Tx_vs_week 1	0.00758578	12.1	PIK3R1	PRKCH	AKT3	RHOH	EIF3H	EIF3B	GNB1L	PIK3C2B	RRAS2	NAPEPLD	RPS6	PRKCQ	PPP2R2B	RHOF	EIF3E	EIF3G	DDIT4
mTOR Signaling	Pre-Tx_vs_week 2	0.0380189	10.7	PIK3R1	PPP2R1B	EIF3C	AKT3	EIF3B	PPP2R5C	PIK3C2B	GNB1L	HRAS	NAPEPLD	RPS6	PRKCQ	RHOF	EIF3G	DDIT4
Primary Immunodeficiency Signaling	Pre-Tx_vs_week 1	0.00891251	16.1	LCK	CD40LG	CD3D	ZAP70	FYN	CD8A	TCF7	UNG	ADA
Primary Immunodeficiency Signaling	Pre-Tx_vs_week 2	0.0102329	16.1	RFX5	IGHG1	LCK	CD3D	ZAP70	SHC1	FYN	TCF7	ADA
Primary Immunodeficiency Signaling	Pre-Tx_vs_week 4	0.00398107	12.5	IGHG1	LCK	CD40LG	CD3D	ZAP70	FYN	TCF7
Primary Immunodeficiency Signaling	Pre-Tx_vs_week 8	0.0057544	10.7	IGHG1	LCK	CD3D	ZAP70	FYN	TCF7
Systemic Lupus Erythematosus Signaling	Pre-Tx_vs_week 1	0.0107152	12.5	PIK3R1	TRA@	LCK	CD40LG	TRGV9	TRD@	AKT3	CAMK4	PIK3C2B	RRAS2	PLCG1	CD3E	CD3D	NFATC2	CD247	LAT	CD28
Systemic Lupus Erythematosus Signaling	Pre-Tx_vs_week 2	0.0269153	11	CD3G	PIK3R1	TRA@	LCK	TRD@	AKT3	CAMK4	PIK3C2B	HRAS	IGHG1	PLCG1	CD3E	CD3D	CD247	LAT
Systemic Lupus Erythematosus Signaling	Pre-Tx_vs_week 4	0.00870964	8.09	NFATC1	TRA@	IGHG1	LCK	CD40LG	PLCG1	CD3D	NFATC2	IGHG3	LAT	CAMK4
Glioma Signaling	Pre-Tx_vs_week 1	0.0120226	12.1	PIK3R1	PRKCH	CDK4	CDK6	AKT3	PDGFD	CAMK4	PIK3C2B	RRAS2	PLCG1	CALM1	SIN3A	PRKCQ
Phenylalanine, Tyrosine and Tryptophan Biosynthesis	Pre-Tx_vs_week 1	0.0158489	23.5	YARS	GOT2	ENO2	FARSB
Phenylalanine, Tyrosine and Tryptophan Biosynthesis	Pre-Tx_vs_week 2	0.0169824	29.4	YARS	GOT2	ENO2	FARSA	FARSB
Phenylalanine, Tyrosine and Tryptophan Biosynthesis	Pre-Tx_vs_week 4	0.018197	17.6	PCBD2	ENO2	FARSB
Small Cell Lung Cancer Signaling	Pre-Tx_vs_week 1	0.0162181	12.3	PIK3R1	CYCS (includes EG:54205)	CDK4	CDK6	FHIT	BCL2	SIN3A	AKT3	TRAF1	PIK3C2B
Small Cell Lung Cancer Signaling	Pre-Tx_vs_week 2	0.0446684	11.1	PIK3R1	SUV39H1	CYCS (includes EG:54205)	CDK4	BCL2	PIAS3	AKT3	TRAF1	PIK3C2B
Apoptosis Signaling	Pre-Tx_vs_week 1	0.0245471	12.2	PARP1	CYCS (includes EG:54205)	RRAS2	CAPN2	PLCG1	DFFA	DIABLO	MAP3K14	BCL2	PRKCQ	CASP6
Ceramide Signaling	Pre-Tx_vs_week 1	0.0275423	12.7	PIK3R1	CYCS (includes EG:54205)	RRAS2	DIABLO	BCL2	S1PR1	AKT3	S1PR5	PPP2R2B	PIK3C2B
Alanine and Aspartate Metabolism	Pre-Tx_vs_week 1	0.0288403	16.7	ASS1	ADSL	GOT2	CAD	AARS2	ASNS	AARS
Alanine and Aspartate Metabolism	Pre-Tx_vs_week 2	0.00933254	19	ASS1	DARS	ADSL	GOT2	CAD	AARS2	ASNS	AARS
Lipid Antigen Presentation by CD1	Pre-Tx_vs_week 1	0.0301995	23.8	TRA@	TRGV9	CD3E	TRD@	CD1C
Allograft Rejection Signaling	Pre-Tx_vs_week 1	0.0331131	17.9	TRA@	CD40LG	TRGV9	PRF1	TRD@	GZMB	CD28
Allograft Rejection Signaling	Pre-Tx_vs_week 4	0.0114815	12.8	TRA@	IGHG1	CD40LG	PRF1	IGHG3
Crosstalk between Dendritic Cells and Natural Killer Cells	Pre-Tx_vs_week 1	0.0338844	15.1	KIR2DL4	CD40LG	KIR2DL5A	KIR3DL3	KIR2DL1	KLRD1	CCR7	IL2RB	PRF1	KIR3DL2	NCR3	KIR2DL2	KLRK1	CD28
Tyrosine Metabolism	Pre-Tx_vs_week 1	0.0380189	11.4	GOT2	MIF	DBT	MGMT	EDF1	ADHFE1	ADH5 (includes EG:128)	METTL1
Autoimmune Thyroid Disease Signaling	Pre-Tx_vs_week 1	0.0416869	17.1	TRA@	CD40LG	TRGV9	PRF1	TRD@	GZMB	CD28
Autoimmune Thyroid Disease Signaling	Pre-Tx_vs_week 4	0.0144544	12.2	TRA@	IGHG1	CD40LG	PRF1	IGHG3
One Carbon Pool by Folate	Pre-Tx_vs_week 1	0.0436516	18.2	ATIC	GART	MTR	SHMT2
One Carbon Pool by Folate	Pre-Tx_vs_week 2	0.0104713	22.7	ATIC	GART	MTR	AMT (includes EG:275)	SHMT2
One Carbon Pool by Folate	Pre-Tx_vs_week 4	0.0398107	13.6	ATIC	AMT (includes EG:275)	MTHFD1
Ubiquinone Biosynthesis	Pre-Tx_vs_week 2	4.7863e-05	23.9	NDUFB7	NDUFA11	METTL6	NDUFS8	METTL1	NDUFB8	FTSJ2	NDUFA9 (includes EG:4704)	METTL2B	MGMT	NDUFB11	EDF1	NDUFB9	NDUFV1	NDUFS3	NDUFB2	NDUFS6 (includes EG:4726)
Ubiquinone Biosynthesis	Pre-Tx_vs_week 8	0.0104713	8.45	NDUFB8	NDUFA7	NDUFB7	NDUFA11	EDF1	NDUFS5
Selenoamino Acid Metabolism	Pre-Tx_vs_week 2	0.0158489	23.7	SEPHS1	FTSJ2	MAT2A	GGT7	METTL6	METTL2B	MGMT	EDF1	METTL1
G Protein Signaling Mediated by Tubby	Pre-Tx_vs_week 4	0.0295121	11.4	LCK	PLCG1	ABL1	GNB1L
DNA Methylation and Transcriptional Repression Signaling	Pre-Tx_vs_week 12	0.0288403	13	MBD3 (includes EG:53615)	CHD4	CHD3
N-Glycan Degradation	Pre-Tx_vs_week 12	0.0323594	10.3	MAN1C1	MAN1B1	HEXA
Mitochondrial Dysfunction	Pre-Tx_vs_week 2	0.0323594	11.6	NDUFB7	CYCS (includes EG:54205)	NDUFA11	NDUFS8	COX4I1	NDUFB8	HSD17B10	NDUFA9 (includes EG:4704)	NDUFB11	NDUFB9	NDUFV1	NDUFS3	GPX7	NDUFB2	NDUFS6 (includes EG:4726)
Cleavage and Polyadenylation of Pre-mRNA	Pre-Tx_vs_week 8	0.0436516	16.7	PABPN1	CPSF1
